# Supplementary material
Source: publisher figshare collection journal article supplement (https://tandf.figshare.com/ndownloader/files/8171552)
Supplement: Supplementary file 1 [file 8171552]

**Supplementary Material**

Synthesis and characterization of lanthanide complexes prepared with 2‑((E)-(1-hydroxy-2-methylpropan-2-ylimino)methyl)-6-methoxyphenol

ABUBAK’R ABRAHAMS*, TATENDA MADANHIRE, ERIC HOSTEN and RICHARD BETZ

**fa355 P2(1)/c R = 0.03 : ay, 4 April 2016**

C o n t e n t s

===============

Table S1 - Crystal Data and Details of the Structure Determination

for: fa355 P2(1)/c R = 0.03

Table S2 - Final Coordinates and Equivalent Isotropic Displacement

Parameters of the non-Hydrogen atoms

for: fa355 P2(1)/c R = 0.03

Table S3 - Hydrogen Atom Positions and Isotropic Displacement

Parameters

for: fa355 P2(1)/c R = 0.03

Table S4 - (An)isotropic Displacement Parameters

for: fa355 P2(1)/c R = 0.03

Table S5 - Bond Distances (Angstrom)

for: fa355 P2(1)/c R = 0.03

Table S6 - Bond Angles (Degrees)

for: fa355 P2(1)/c R = 0.03

Table S7 - Torsion Angles (Degrees)

for: fa355 P2(1)/c R = 0.03

Table S8 - Contact Distances (Angstrom)

for: fa355 P2(1)/c R = 0.03

Table S9 - Hydrogen Bonds (Angstrom, Deg)

for: fa355 P2(1)/c R = 0.03

Table S1 - Crystal Data and Details of the Structure Determination

for: fa355 P2(1)/c R = 0.03

Crystal Data

Formula C24 H34 Gd N5 O15

Formula Weight 789.81

Crystal System monoclinic

Space group P21/c (No. 14)

a, b, c [Angstrom] 11.9775(4) 12.6167(3) 20.5691(5)

alpha, beta, gamma [deg] 90 90.271(1) 90

V [Ang**3] 3108.30(15)

Z 4

D(calc) [g/cm**3] 1.688

Mu(MoKa) [ /mm ] 2.211

F(000) 1588

Crystal Size [mm] 0.24 x 0.29 x 0.34

Data Collection

Temperature (K) 200

Radiation [Angstrom] MoKa 0.71073

Theta Min-Max [Deg] 1.7, 28.3

Dataset -15: 13 ; -16: 14 ; -22: 27

Tot., Uniq. Data, R(int) 28708, 7493, 0.016

Observed Data [I > 2.0 sigma(I)] 6385

Refinement

Nref, Npar 7493, 441

R, wR2, S 0.0255, 0.0557, 1.17

w = ^2^(FO^2^)+(0.0069P)^2^+5.8532P] WHERE P=(FO^2^+2FC^2^)/3'

Max. and Av. Shift/Error 0.00, 0.00

Min. and Max. Resd. Dens. [e/Ang^3] -0.91, 1.77

Table S2 - Final Coordinates and Equivalent Isotropic Displacement

Parameters of the non-Hydrogen atoms

for: fa355 P2(1)/c R = 0.03

Atom x y z U(eq) [Ang^2]

---- --- --- --- -----------

Gd1 0.34708(2) 0.38943(2) 0.32290(2) 0.0218(1)

O11 0.36207(15) 0.31177(15) 0.22276(8) 0.0257(6)

O12 0.50523(16) 0.46124(15) 0.25188(9) 0.0276(6)

O13 0.1393(3) 0.1024(4) 0.23126(15) 0.1094(18)

O21 0.28742(16) 0.54290(15) 0.27095(9) 0.0290(6)

O22 0.34547(17) 0.55974(16) 0.39253(9) 0.0301(6)

*O23 -0.0578(4) 0.5717(5) 0.1492(2) 0.076(2)

*O24 0.1074(8) 0.4093(6) 0.1390(4) 0.079(3)

O31 0.52046(17) 0.41319(16) 0.38937(9) 0.0326(6)

O32 0.50790(18) 0.26389(17) 0.33895(10) 0.0381(7)

O33 0.6495(2) 0.2942(2) 0.40269(13) 0.0624(10)

O41 0.32707(18) 0.29924(17) 0.43291(9) 0.0357(7)

O42 0.26635(18) 0.21127(16) 0.34985(9) 0.0350(7)

O43 0.2392(2) 0.1501(2) 0.44722(11) 0.0574(9)

O51 0.15681(18) 0.41799(18) 0.36847(11) 0.0400(7)

O52 0.15414(18) 0.35732(18) 0.27044(11) 0.0398(7)

O53 -0.00147(19) 0.3928(2) 0.31912(16) 0.0668(12)

N1 0.2485(2) 0.2063(2) 0.13351(12) 0.0299(7)

N2 0.1778(2) 0.6176(2) 0.16947(11) 0.0292(7)

N3 0.5622(2) 0.3225(2) 0.37753(12) 0.0353(8)

N4 0.2768(2) 0.2183(2) 0.41099(11) 0.0339(8)

N5 0.1001(2) 0.3891(2) 0.31912(14) 0.0377(8)

C11 0.5576(3) 0.5618(3) 0.26562(15) 0.0407(10)

Table S2 - Final Coordinates and Equivalent Isotropic Displacement

Parameters of the non-Hydrogen atoms (continued)

for: fa355 P2(1)/c R = 0.03

Atom x y z U(eq) [Ang^2]

---- --- --- --- -----------

C12 0.3194(2) 0.2446(2) 0.09287(13) 0.0279(8)

C13 0.1523(3) 0.1360(3) 0.11786(15) 0.0390(10)

C14 0.0775(3) 0.1392(3) 0.17714(19) 0.0539(13)

C15 0.1956(4) 0.0256(3) 0.1068(3) 0.0852(19)

C16 0.0893(4) 0.1791(5) 0.0594(2) 0.111(3)

C21 0.3715(3) 0.5661(3) 0.46072(14) 0.0437(10)

C22 0.1679(2) 0.7039(2) 0.20254(14) 0.0309(8)

C23 0.1293(3) 0.5936(3) 0.10471(14) 0.0350(9)

*C24 0.0244(10) 0.5246(11) 0.1162(10) 0.049(3)

C25 0.0885(4) 0.6931(3) 0.07088(18) 0.0601(14)

C26 0.2213(4) 0.5433(4) 0.06530(19) 0.0687(16)

*C27 0.051(2) 0.504(2) 0.1159(14) 0.054(4)

C111 0.4068(2) 0.3163(2) 0.10993(12) 0.0251(8)

C112 0.4211(2) 0.3504(2) 0.17499(12) 0.0230(7)

C113 0.4992(2) 0.4326(2) 0.18712(12) 0.0252(8)

C114 0.5600(2) 0.4771(2) 0.13774(14) 0.0321(9)

C115 0.5463(3) 0.4403(3) 0.07380(14) 0.0368(10)

C116 0.4722(2) 0.3619(2) 0.06004(13) 0.0324(9)

C211 0.2084(2) 0.7166(2) 0.26747(14) 0.0292(8)

C212 0.2634(2) 0.6322(2) 0.29949(13) 0.0257(8)

C213 0.2918(2) 0.6475(2) 0.36577(13) 0.0267(8)

C214 0.2673(3) 0.7396(2) 0.39789(15) 0.0358(9)

C215 0.2137(3) 0.8225(3) 0.36480(16) 0.0418(10)

C216 0.1849(3) 0.8119(2) 0.30091(16) 0.0381(10)

U(eq) = 1/3 of the trace of the orthogonalized U Tensor

Starred Atom sites have a S.O.F less than 1.0

Table S3 - Hydrogen Atom Positions and Isotropic Displacement

Parameters

for: fa355 P2(1)/c R = 0.03

Atom x y z U(iso) [Ang^2]

---- --- --- --- -----------

H1 0.258(3) 0.221(3) 0.1724(17) 0.044(10)

H2 0.213(3) 0.566(3) 0.1903(16) 0.042(10)

H11A 0.63700 0.55790 0.25470 0.0610

H11B 0.54950 0.57840 0.31190 0.0610

H11C 0.52170 0.61740 0.23960 0.0610

H12 0.31310 0.22380 0.04860 0.0340

H13 0.14110 0.14970 0.26000 0.1640

H14A 0.05160 0.21260 0.18500 0.0650

H14B 0.01120 0.09370 0.17000 0.0650

H15A 0.13420 -0.02020 0.09220 0.1280

H15B 0.22680 -0.00230 0.14750 0.1280

H15C 0.25380 0.02710 0.07350 0.1280

H16A 0.13680 0.17470 0.02080 0.1660

H16B 0.06910 0.25320 0.06730 0.1660

H16C 0.02150 0.13720 0.05240 0.1660

H21A 0.40220 0.49820 0.47550 0.0660

H21B 0.30350 0.58210 0.48510 0.0660

H21C 0.42670 0.62230 0.46810 0.0660

H22 0.13150 0.76240 0.18250 0.0370

*H23 -0.08020 0.62510 0.12860 0.1140

*H24 0.09820 0.40340 0.17930 0.1180

*H24A -0.00540 0.50200 0.07340 0.0590

*H24B 0.04720 0.46000 0.14010 0.0590

H25A 0.06490 0.67570 0.02650 0.0910

H25B 0.14910 0.74530 0.06950 0.0910

Table S3 - Hydrogen Atom Positions and Isotropic Displacement

Parameters (continued)

for: fa355 P2(1)/c R = 0.03

Atom x y z U(iso) [Ang^2]

---- --- --- --- -----------

H25C 0.02520 0.72270 0.09480 0.0910

H26A 0.19190 0.52240 0.02260 0.1030

H26B 0.24950 0.48050 0.08810 0.1030

H26C 0.28220 0.59430 0.05960 0.1030

*H27A -0.00510 0.52600 0.14820 0.0650

*H27B 0.01180 0.48780 0.07480 0.0650

H114 0.61130 0.53260 0.14680 0.0390

H115 0.58930 0.47060 0.03980 0.0440

H116 0.46420 0.33740 0.01660 0.0390

H214 0.28670 0.74730 0.44250 0.0430

H215 0.19730 0.88660 0.38710 0.0500

H216 0.14890 0.86870 0.27880 0.0460

=======================================================

The Temperature Factor has the Form of Exp(-T) Where

T = 8*(Pi**2)*U*(Sin(Theta)/Lambda)**2 for Isotropic Atoms

Table S4 - (An)isotropic Displacement Parameters

for: fa355 P2(1)/c R = 0.03

Atom U(1,1) or U U(2,2) U(3,3) U(2,3) U(1,3) U(1,2)

---- ------ ------ ------ ------ ------ ------

Gd1 0.0274(1) 0.0229(1) 0.0152(1) 0.0005(1) -0.0024(1) 0.0011(1)

O11 0.0308(10) 0.0284(10) 0.0178(9) 0.0013(7) 0.0012(7) -0.0060(8)

O12 0.0336(10) 0.0258(10) 0.0234(9) -0.0008(8) -0.0023(7) -0.0056(8)

O13 0.113(3) 0.166(4) 0.0491(18) 0.020(2)-0.0123(19) -0.087(3)

O21 0.0402(11) 0.0260(10) 0.0207(9) -0.0011(8) -0.0046(8) 0.0060(8)

O22 0.0410(11) 0.0306(11) 0.0185(9) -0.0031(8) -0.0060(8) 0.0032(8)

O23 0.049(3) 0.110(5) 0.068(3) 0.005(3) 0.006(2) 0.003(3)

O24 0.113(7) 0.064(5) 0.059(5) 0.005(4) -0.012(5) -0.013(4)

O31 0.0354(11) 0.0329(11) 0.0295(10) -0.0040(8) -0.0063(8) 0.0052(8)

O32 0.0452(13) 0.0357(12) 0.0332(11) -0.0094(9) -0.0101(9) 0.0072(9)

O33 0.0511(15) 0.0677(18) 0.0682(18)-0.0178(14)-0.0313(13) 0.0280(13)

O41 0.0508(13) 0.0352(12) 0.0211(10) 0.0015(8) -0.0023(9)-0.0053(10)

O42 0.0502(13) 0.0321(11) 0.0227(10) 0.0005(8) -0.0032(9) -0.0034(9)

O43 0.088(2) 0.0469(15) 0.0374(13) 0.0180(11) 0.0040(13)-0.0195(14)

O51 0.0380(12) 0.0438(13) 0.0383(12)-0.0049(10) 0.0068(9)-0.0001(10)

O52 0.0364(12) 0.0432(13) 0.0396(12)-0.0064(10) -0.0084(9) 0.0016(9)

O53 0.0250(12) 0.0553(17) 0.120(3)-0.0197(17) 0.0005(13)-0.0024(11)

N1 0.0340(13) 0.0333(13) 0.0224(12)-0.0023(10) -0.0009(9)-0.0047(10)

N2 0.0338(13) 0.0288(13) 0.0250(12) 0.0048(10) -0.0063(9) 0.0053(10)

N3 0.0368(14) 0.0405(15) 0.0284(13)-0.0041(11)-0.0080(10) 0.0075(11)

N4 0.0446(15) 0.0313(14) 0.0258(12) 0.0063(10) 0.0000(10)-0.0023(11)

N5 0.0290(13) 0.0244(12) 0.0596(17)-0.0023(12)-0.0002(11)-0.0012(10)

C11 0.0523(19) 0.0344(17) 0.0353(17)-0.0026(13)-0.0039(14)-0.0169(14)

Table S4 - (An)isotropic Displacement Parameters (continued)

for: fa355 P2(1)/c R = 0.03

Atom U(1,1) or U U(2,2) U(3,3) U(2,3) U(1,3) U(1,2)

---- ------ ------ ------ ------ ------ ------

C12 0.0324(14) 0.0324(15) 0.0190(12)-0.0011(11)-0.0009(10) 0.0019(11)

C13 0.0366(16) 0.0460(19) 0.0343(16)-0.0048(14)-0.0010(12)-0.0128(14)

C14 0.0378(18) 0.056(2) 0.068(3)-0.0194(19) 0.0144(17)-0.0131(16)

C15 0.062(3) 0.061(3) 0.133(4) -0.053(3) 0.041(3) -0.025(2)

C16 0.093(4) 0.157(6) 0.082(3) 0.055(4) -0.059(3) -0.075(4)

C21 0.065(2) 0.0453(19) 0.0208(14)-0.0045(13)-0.0091(14) 0.0095(16)

C22 0.0306(14) 0.0276(15) 0.0345(15) 0.0034(12)-0.0064(11) 0.0054(11)

C23 0.0384(16) 0.0417(18) 0.0248(14) 0.0022(12)-0.0072(11) 0.0065(13)

C24 0.041(5) 0.056(6) 0.050(5) -0.003(5) -0.010(4) -0.012(4)

C25 0.078(3) 0.056(2) 0.046(2) 0.0053(18)-0.0321(19) 0.010(2)

C26 0.071(3) 0.093(3) 0.042(2) -0.025(2)-0.0054(19) 0.030(2)

C27 0.065(9) 0.066(7) 0.032(7) 0.002(6) -0.009(7) -0.017(6)

C111 0.0288(13) 0.0283(14) 0.0181(12) 0.0026(10) 0.0006(10) 0.0012(10)

C112 0.0245(12) 0.0241(13) 0.0204(12) 0.0035(10) 0.0009(9) 0.0027(10)

C113 0.0276(13) 0.0268(14) 0.0211(12) 0.0023(10)-0.0021(10) 0.0011(10)

C114 0.0303(14) 0.0357(16) 0.0302(15) 0.0076(12) 0.0014(11)-0.0056(12)

C115 0.0368(16) 0.0462(19) 0.0276(15) 0.0101(13) 0.0075(12)-0.0036(13)

C116 0.0349(15) 0.0438(18) 0.0185(13) 0.0035(11) 0.0040(11) 0.0020(12)

C211 0.0300(14) 0.0260(14) 0.0316(15)-0.0015(11)-0.0030(11) 0.0015(11)

C212 0.0242(13) 0.0272(14) 0.0258(13)-0.0010(10)-0.0013(10)-0.0002(10)

C213 0.0289(13) 0.0254(13) 0.0258(13) 0.0011(11) 0.0004(10)-0.0017(10)

C214 0.0395(16) 0.0359(17) 0.0318(15)-0.0113(13)-0.0046(12) 0.0018(13)

C215 0.0468(18) 0.0313(17) 0.0471(19)-0.0147(14)-0.0076(14) 0.0083(14)

C216 0.0407(17) 0.0277(16) 0.0459(18)-0.0017(13)-0.0096(14) 0.0073(12)

=======================================================

The Temperature Factor has the Form of Exp(-T) Where

T = 8*(Pi**2)*U*(Sin(Theta)/Lambda)**2 for Isotropic Atoms

T = 2*(Pi**2)*Sumij(h(i)*h(j)*U(i,j)*Astar(i)*Astar(j)), for

Anisotropic Atoms. Astar(i) are Reciprocal Axial Lengths and

h(i) are the Reflection Indices.

Table S5 - Bond Distances (Angstrom)

for: fa355 P2(1)/c R = 0.03

Gd1 -O11 2.2888(17) N1 -C12 1.289(4)

Gd1 -O12 2.5630(19) N1 -C13 1.488(4)

Gd1 -O21 2.3226(19) N2 -C22 1.290(4)

Gd1 -O22 2.582(2) N2 -C23 1.482(4)

Gd1 -O31 2.499(2) O13 -H13 0.8400

Gd1 -O32 2.514(2) O23 -H23 0.8400

Gd1 -O41 2.545(2) O24 -H24 0.8400

Gd1 -O42 2.510(2) N1 -H1 0.83(4)

Gd1 -O51 2.495(2) N2 -H2 0.89(4)

Gd1 -O52 2.578(2) C12 -C111 1.426(3)

O11 -C112 1.308(3) C13 -C14 1.517(5)

O12 -C11 1.443(4) C13 -C16 1.517(6)

O12 -C113 1.382(3) C13 -C15 1.504(5)

O13 -C14 1.412(5) C22 -C211 1.428(4)

O21 -C212 1.303(3) C23 -C24 1.548(13)

O22 -C21 1.438(3) C23 -C25 1.515(5)

O22 -C213 1.392(3) C23 -C26 1.511(6)

O23 -C24 1.338(16) C23 -C27 1.49(3)

O24 -C27 1.45(3) C111 -C116 1.416(4)

O31 -N3 1.273(3) C111 -C112 1.415(3)

O32 -N3 1.263(3) C112 -C113 1.418(3)

O33 -N3 1.218(3) C113 -C114 1.373(4)

O41 -N4 1.267(3) C114 -C115 1.404(4)

O42 -N4 1.266(3) C115 -C116 1.358(4)

O43 -N4 1.226(3) C211 -C212 1.413(4)

O51 -N5 1.272(4) C211 -C216 1.414(4)

O52 -N5 1.260(4) C212 -C213 1.417(4)

O53 -N5 1.218(3) C213 -C214 1.369(4)

Table S5 - Bond Distances (Angstrom) (continued)

for: fa355 P2(1)/c R = 0.03

C214 -C215 1.402(5) C22 -H22 0.9500

C215 -C216 1.364(5) C24 -H24A 0.9900

C11 -H11A 0.9800 C24 -H24B 0.9900

C11 -H11B 0.9800 C25 -H25A 0.9800

C11 -H11C 0.9800 C25 -H25B 0.9800

C12 -H12 0.9500 C25 -H25C 0.9800

C14 -H14A 0.9900 C26 -H26A 0.9800

C14 -H14B 0.9900 C26 -H26B 0.9800

C15 -H15A 0.9800 C26 -H26C 0.9800

C15 -H15B 0.9800 C27 -H27B 0.9900

C15 -H15C 0.9800 C27 -H27A 0.9900

C16 -H16A 0.9800 C114 -H114 0.9500

C16 -H16B 0.9800 C115 -H115 0.9500

C16 -H16C 0.9800 C116 -H116 0.9500

C21 -H21A 0.9800 C214 -H214 0.9500

C21 -H21B 0.9800 C215 -H215 0.9500

C21 -H21C 0.9800 C216 -H216 0.9500

Table S6 - Bond Angles (Degrees)

for: fa355 P2(1)/c R = 0.03

O11 -Gd1 -O12 64.98(6) O22 -Gd1 -O51 70.26(7)

O11 -Gd1 -O21 88.17(7) O22 -Gd1 -O52 110.73(7)

O11 -Gd1 -O22 148.89(6) O31 -Gd1 -O32 50.92(7)

O11 -Gd1 -O31 118.37(6) O31 -Gd1 -O41 69.43(7)

O11 -Gd1 -O32 77.60(7) O31 -Gd1 -O42 107.86(7)

O11 -Gd1 -O41 128.09(7) O31 -Gd1 -O51 122.37(7)

O11 -Gd1 -O42 81.22(6) O31 -Gd1 -O52 171.44(7)

O11 -Gd1 -O51 118.41(7) O32 -Gd1 -O41 71.15(7)

O11 -Gd1 -O52 68.28(7) O32 -Gd1 -O42 72.70(7)

O12 -Gd1 -O21 70.71(6) O32 -Gd1 -O51 137.93(7)

O12 -Gd1 -O22 91.69(6) O32 -Gd1 -O52 129.84(7)

O12 -Gd1 -O31 69.81(6) O41 -Gd1 -O42 50.60(6)

O12 -Gd1 -O32 74.32(6) O41 -Gd1 -O51 68.93(7)

O12 -Gd1 -O41 137.54(7) O41 -Gd1 -O52 102.35(7)

O12 -Gd1 -O42 136.80(6) O42 -Gd1 -O51 72.11(7)

O12 -Gd1 -O51 147.36(7) O42 -Gd1 -O52 66.81(7)

O12 -Gd1 -O52 118.72(7) O51 -Gd1 -O52 50.30(7)

O21 -Gd1 -O22 63.79(6) Gd1 -O11 -C112 124.18(16)

O21 -Gd1 -O31 113.88(7) Gd1 -O12 -C11 121.40(17)

O21 -Gd1 -O32 145.03(7) Gd1 -O12 -C113 114.94(15)

O21 -Gd1 -O41 138.74(7) C11 -O12 -C113 116.1(2)

O21 -Gd1 -O42 136.90(7) Gd1 -O21 -C212 125.56(16)

O21 -Gd1 -O51 76.87(7) Gd1 -O22 -C21 125.83(19)

O21 -Gd1 -O52 70.44(7) Gd1 -O22 -C213 116.56(15)

O22 -Gd1 -O31 66.74(6) C21 -O22 -C213 116.0(2)

O22 -Gd1 -O32 117.33(7) Gd1 -O31 -N3 96.53(15)

O22 -Gd1 -O41 82.99(6) Gd1 -O32 -N3 96.06(16)

O22 -Gd1 -O42 128.23(6) Gd1 -O41 -N4 95.19(14)

Table S6 - Bond Angles (Degrees) (continued)

for: fa355 P2(1)/c R = 0.03

Gd1 -O42 -N4 96.91(16) O13 -C14 -C13 108.4(3)

Gd1 -O51 -N5 98.29(17) N2 -C22 -C211 123.8(2)

Gd1 -O52 -N5 94.60(16) N2 -C23 -C24 107.0(8)

C12 -N1 -C13 126.5(2) N2 -C23 -C25 111.6(3)

C22 -N2 -C23 127.6(3) N2 -C23 -C26 106.5(3)

O31 -N3 -O32 116.4(2) N2 -C23 -C27 105.1(11)

O31 -N3 -O33 121.3(2) C24 -C23 -C26 116.1(7)

O32 -N3 -O33 122.3(3) C25 -C23 -C26 109.6(3)

O41 -N4 -O42 117.0(2) C24 -C23 -C25 106.0(6)

O41 -N4 -O43 121.7(2) C26 -C23 -C27 103.1(10)

O42 -N4 -O43 121.3(2) C25 -C23 -C27 119.9(10)

O51 -N5 -O52 116.8(2) O23 -C24 -C23 115.3(10)

O51 -N5 -O53 121.3(3) O24 -C27 -C23 112.6(16)

O52 -N5 -O53 122.0(3) C12 -C111 -C116 119.2(2)

C14 -O13 -H13 109.00 C112 -C111 -C116 119.8(2)

C24 -O23 -H23 110.00 C12 -C111 -C112 120.7(2)

C27 -O24 -H24 109.00 O11 -C112 -C113 119.9(2)

C13 -N1 -H1 116(2) C111 -C112 -C113 117.7(2)

C12 -N1 -H1 117(3) O11 -C112 -C111 122.3(2)

C22 -N2 -H2 114(2) O12 -C113 -C114 125.5(2)

C23 -N2 -H2 118(2) C112 -C113 -C114 121.4(2)

N1 -C12 -C111 124.3(2) O12 -C113 -C112 113.1(2)

C14 -C13 -C16 109.5(3) C113 -C114 -C115 119.9(3)

N1 -C13 -C14 105.7(3) C114 -C115 -C116 120.6(3)

N1 -C13 -C15 108.5(3) C111 -C116 -C115 120.5(2)

N1 -C13 -C16 109.8(3) C22 -C211 -C212 120.5(2)

C14 -C13 -C15 110.6(3) C22 -C211 -C216 118.9(2)

C15 -C13 -C16 112.5(4) C212 -C211 -C216 120.5(3)

Table S6 - Bond Angles (Degrees) (continued)

for: fa355 P2(1)/c R = 0.03

O21 -C212 -C211 123.0(2) C13 -C16 -H16A 109.00

C211 -C212 -C213 117.1(2) C13 -C16 -H16B 109.00

O21 -C212 -C213 119.9(2) C13 -C16 -H16C 109.00

O22 -C213 -C214 125.7(2) H16A -C16 -H16B 109.00

C212 -C213 -C214 121.9(2) H16A -C16 -H16C 110.00

O22 -C213 -C212 112.4(2) H16B -C16 -H16C 110.00

C213 -C214 -C215 119.8(3) O22 -C21 -H21A 109.00

C214 -C215 -C216 120.5(3) O22 -C21 -H21B 110.00

C211 -C216 -C215 120.1(3) O22 -C21 -H21C 110.00

O12 -C11 -H11A 109.00 H21A -C21 -H21B 109.00

O12 -C11 -H11B 109.00 H21A -C21 -H21C 109.00

O12 -C11 -H11C 109.00 H21B -C21 -H21C 109.00

H11A -C11 -H11B 110.00 N2 -C22 -H22 118.00

H11A -C11 -H11C 110.00 C211 -C22 -H22 118.00

H11B -C11 -H11C 109.00 O23 -C24 -H24A 108.00

N1 -C12 -H12 118.00 O23 -C24 -H24B 108.00

C111 -C12 -H12 118.00 C23 -C24 -H24A 108.00

O13 -C14 -H14A 110.00 C23 -C24 -H24B 108.00

O13 -C14 -H14B 110.00 H24A -C24 -H24B 108.00

C13 -C14 -H14A 110.00 C23 -C25 -H25A 109.00

C13 -C14 -H14B 110.00 C23 -C25 -H25B 109.00

H14A -C14 -H14B 108.00 C23 -C25 -H25C 110.00

C13 -C15 -H15A 109.00 H25A -C25 -H25B 110.00

C13 -C15 -H15B 109.00 H25A -C25 -H25C 109.00

C13 -C15 -H15C 110.00 H25B -C25 -H25C 109.00

H15A -C15 -H15B 109.00 C23 -C26 -H26A 109.00

H15A -C15 -H15C 109.00 C23 -C26 -H26B 109.00

H15B -C15 -H15C 110.00 C23 -C26 -H26C 109.00

Table S6 - Bond Angles (Degrees) (continued)

for: fa355 P2(1)/c R = 0.03

H26A -C26 -H26B 109.00 C116 -C115 -H115 120.00

H26A -C26 -H26C 109.00 C114 -C115 -H115 120.00

H26B -C26 -H26C 109.00 C111 -C116 -H116 120.00

C23 -C27 -H27B 109.00 C115 -C116 -H116 120.00

H27A -C27 -H27B 108.00 C213 -C214 -H214 120.00

O24 -C27 -H27A 109.00 C215 -C214 -H214 120.00

O24 -C27 -H27B 109.00 C216 -C215 -H215 120.00

C23 -C27 -H27A 109.00 C214 -C215 -H215 120.00

C115 -C114 -H114 120.00 C215 -C216 -H216 120.00

C113 -C114 -H114 120.00 C211 -C216 -H216 120.00

Table S7 - Torsion Angles (Degrees)

for: fa355 P2(1)/c R = 0.03

O12 -Gd1 -O11 -C112 -14.36(17)

O21 -Gd1 -O11 -C112 55.17(19)

O22 -Gd1 -O11 -C112 30.4(3)

O31 -Gd1 -O11 -C112 -61.1(2)

O32 -Gd1 -O11 -C112 -92.66(19)

O41 -Gd1 -O11 -C112 -146.32(17)

O42 -Gd1 -O11 -C112 -166.75(19)

O51 -Gd1 -O11 -C112 129.16(18)

O52 -Gd1 -O11 -C112 124.8(2)

O11 -Gd1 -O12 -C11 162.4(2)

O11 -Gd1 -O12 -C113 14.01(15)

O21 -Gd1 -O12 -C11 65.2(2)

O21 -Gd1 -O12 -C113 -83.24(16)

O22 -Gd1 -O12 -C11 3.7(2)

O22 -Gd1 -O12 -C113 -144.66(16)

O31 -Gd1 -O12 -C11 -60.7(2)

O31 -Gd1 -O12 -C113 150.92(17)

O32 -Gd1 -O12 -C11 -114.2(2)

O32 -Gd1 -O12 -C113 97.39(17)

O41 -Gd1 -O12 -C11 -77.7(2)

O41 -Gd1 -O12 -C113 133.89(16)

O42 -Gd1 -O12 -C11 -155.60(19)

O42 -Gd1 -O12 -C113 56.01(19)

O51 -Gd1 -O12 -C11 58.3(2)

O51 -Gd1 -O12 -C113 -90.2(2)

O52 -Gd1 -O12 -C11 118.6(2)

O52 -Gd1 -O12 -C113 -29.83(18)

O11 -Gd1 -O21 -C212 -177.8(2)

Table S7 - Torsion Angles (Degrees) (continued)

for: fa355 P2(1)/c R = 0.03

O12 -Gd1 -O21 -C212 -113.7(2)

O22 -Gd1 -O21 -C212 -11.75(18)

O31 -Gd1 -O21 -C212 -57.4(2)

O32 -Gd1 -O21 -C212 -112.6(2)

O41 -Gd1 -O21 -C212 28.1(2)

O42 -Gd1 -O21 -C212 107.2(2)

O51 -Gd1 -O21 -C212 62.48(19)

O52 -Gd1 -O21 -C212 114.7(2)

O11 -Gd1 -O22 -C21 -156.2(2)

O11 -Gd1 -O22 -C213 38.8(2)

O12 -Gd1 -O22 -C21 -116.5(2)

O12 -Gd1 -O22 -C213 78.48(17)

O21 -Gd1 -O22 -C21 176.0(2)

O21 -Gd1 -O22 -C213 10.99(16)

O31 -Gd1 -O22 -C21 -49.4(2)

O31 -Gd1 -O22 -C213 145.63(18)

O32 -Gd1 -O22 -C21 -43.3(2)

O32 -Gd1 -O22 -C213 151.68(16)

O41 -Gd1 -O22 -C21 21.2(2)

O41 -Gd1 -O22 -C213 -143.79(17)

O42 -Gd1 -O22 -C21 45.6(2)

O42 -Gd1 -O22 -C213 -119.42(16)

O51 -Gd1 -O22 -C21 91.3(2)

O51 -Gd1 -O22 -C213 -73.71(17)

O52 -Gd1 -O22 -C21 121.8(2)

O52 -Gd1 -O22 -C213 -43.19(18)

O11 -Gd1 -O31 -N3 -42.58(17)

O12 -Gd1 -O31 -N3 -87.29(15)

Table S7 - Torsion Angles (Degrees) (continued)

for: fa355 P2(1)/c R = 0.03

O21 -Gd1 -O31 -N3 -144.09(15)

O22 -Gd1 -O31 -N3 171.63(16)

O32 -Gd1 -O31 -N3 -1.44(14)

O41 -Gd1 -O31 -N3 80.52(15)

O42 -Gd1 -O31 -N3 46.94(16)

O51 -Gd1 -O31 -N3 126.69(15)

O11 -Gd1 -O32 -N3 145.10(16)

O12 -Gd1 -O32 -N3 77.94(16)

O21 -Gd1 -O32 -N3 76.90(19)

O22 -Gd1 -O32 -N3 -5.71(18)

O31 -Gd1 -O32 -N3 1.45(14)

O41 -Gd1 -O32 -N3 -76.96(16)

O42 -Gd1 -O32 -N3 -130.36(16)

O51 -Gd1 -O32 -N3 -96.00(18)

O52 -Gd1 -O32 -N3 -167.50(15)

O11 -Gd1 -O41 -N4 -29.56(18)

O12 -Gd1 -O41 -N4 -123.03(15)

O21 -Gd1 -O41 -N4 116.73(16)

O22 -Gd1 -O41 -N4 152.16(16)

O31 -Gd1 -O41 -N4 -140.10(17)

O32 -Gd1 -O41 -N4 -85.79(16)

O42 -Gd1 -O41 -N4 -3.04(14)

O51 -Gd1 -O41 -N4 80.67(16)

O52 -Gd1 -O41 -N4 42.40(16)

O11 -Gd1 -O42 -N4 162.23(16)

O12 -Gd1 -O42 -N4 124.38(15)

O21 -Gd1 -O42 -N4 -120.03(16)

O22 -Gd1 -O42 -N4 -28.94(19)

Table S7 - Torsion Angles (Degrees) (continued)

for: fa355 P2(1)/c R = 0.03

O31 -Gd1 -O42 -N4 45.14(17)

O32 -Gd1 -O42 -N4 82.57(16)

O41 -Gd1 -O42 -N4 3.06(14)

O51 -Gd1 -O42 -N4 -74.02(16)

O52 -Gd1 -O42 -N4 -127.72(17)

O11 -Gd1 -O51 -N5 -6.09(19)

O12 -Gd1 -O51 -N5 81.2(2)

O21 -Gd1 -O51 -N5 74.50(17)

O22 -Gd1 -O51 -N5 141.05(18)

O31 -Gd1 -O51 -N5 -175.36(15)

O32 -Gd1 -O51 -N5 -109.67(17)

O41 -Gd1 -O51 -N5 -128.99(18)

O42 -Gd1 -O51 -N5 -75.18(17)

O52 -Gd1 -O51 -N5 -0.83(15)

O11 -Gd1 -O52 -N5 175.85(18)

O12 -Gd1 -O52 -N5 -141.65(15)

O21 -Gd1 -O52 -N5 -88.12(17)

O22 -Gd1 -O52 -N5 -37.57(18)

O32 -Gd1 -O52 -N5 125.16(16)

O41 -Gd1 -O52 -N5 49.52(17)

O42 -Gd1 -O52 -N5 86.32(17)

O51 -Gd1 -O52 -N5 0.83(15)

Gd1 -O11 -C112 -C111 -163.73(18)

Gd1 -O11 -C112 -C113 13.4(3)

Gd1 -O12 -C113 -C112 -13.1(3)

Gd1 -O12 -C113 -C114 166.4(2)

C11 -O12 -C113 -C112 -163.2(2)

C11 -O12 -C113 -C114 16.3(4)

Table S7 - Torsion Angles (Degrees) (continued)

for: fa355 P2(1)/c R = 0.03

Gd1 -O21 -C212 -C211 -168.05(18)

Gd1 -O21 -C212 -C213 11.4(3)

Gd1 -O22 -C213 -C212 -10.0(3)

Gd1 -O22 -C213 -C214 169.9(2)

C21 -O22 -C213 -C212 -176.5(2)

C21 -O22 -C213 -C214 3.4(4)

Gd1 -O31 -N3 -O32 2.5(2)

Gd1 -O31 -N3 -O33 -177.0(2)

Gd1 -O32 -N3 -O31 -2.5(2)

Gd1 -O32 -N3 -O33 177.0(2)

Gd1 -O41 -N4 -O42 5.2(2)

Gd1 -O41 -N4 -O43 -174.3(2)

Gd1 -O42 -N4 -O41 -5.3(2)

Gd1 -O42 -N4 -O43 174.2(2)

Gd1 -O51 -N5 -O52 1.5(3)

Gd1 -O51 -N5 -O53 -178.1(2)

Gd1 -O52 -N5 -O51 -1.4(3)

Gd1 -O52 -N5 -O53 178.2(3)

C13 -N1 -C12 -C111 176.5(3)

C12 -N1 -C13 -C14 -164.2(3)

C12 -N1 -C13 -C15 77.2(4)

C12 -N1 -C13 -C16 -46.1(4)

C23 -N2 -C22 -C211 173.6(3)

C22 -N2 -C23 -C24 -100.6(6)

C22 -N2 -C23 -C25 15.0(4)

C22 -N2 -C23 -C26 134.6(3)

N1 -C12 -C111 -C112 0.2(4)

N1 -C12 -C111 -C116 -173.3(3)

Table S7 - Torsion Angles (Degrees) (continued)

for: fa355 P2(1)/c R = 0.03

N1 -C13 -C14 -O13 -59.6(4)

C15 -C13 -C14 -O13 57.6(4)

C16 -C13 -C14 -O13 -177.9(4)

N2 -C22 -C211 -C212 0.2(4)

N2 -C22 -C211 -C216 -174.9(3)

N2 -C23 -C24 -O23 63.5(13)

C25 -C23 -C24 -O23 -55.7(14)

C26 -C23 -C24 -O23 -177.7(9)

C12 -C111 -C112 -O11 5.8(4)

C12 -C111 -C112 -C113 -171.4(2)

C116 -C111 -C112 -O11 179.2(2)

C116 -C111 -C112 -C113 2.0(4)

C12 -C111 -C116 -C115 171.6(3)

C112 -C111 -C116 -C115 -1.9(4)

O11 -C112 -C113 -O12 1.6(3)

O11 -C112 -C113 -C114 -178.0(2)

C111 -C112 -C113 -O12 178.9(2)

C111 -C112 -C113 -C114 -0.7(4)

O12 -C113 -C114 -C115 179.7(3)

C112 -C113 -C114 -C115 -0.8(4)

C113 -C114 -C115 -C116 0.9(5)

C114 -C115 -C116 -C111 0.4(5)

C22 -C211 -C212 -O21 5.2(4)

C22 -C211 -C212 -C213 -174.2(2)

C216 -C211 -C212 -O21 -179.8(3)

C216 -C211 -C212 -C213 0.8(4)

C22 -C211 -C216 -C215 174.1(3)

C212 -C211 -C216 -C215 -1.0(5)

Table S7 - Torsion Angles (Degrees) (continued)

for: fa355 P2(1)/c R = 0.03

O21 -C212 -C213 -O22 0.5(3)

O21 -C212 -C213 -C214 -179.4(3)

C211 -C212 -C213 -O22 180.0(2)

C211 -C212 -C213 -C214 0.1(4)

O22 -C213 -C214 -C215 179.4(3)

C212 -C213 -C214 -C215 -0.7(5)

C213 -C214 -C215 -C216 0.5(5)

C214 -C215 -C216 -C211 0.4(5)

Table S8 - Contact Distances (Angstrom)

for: fa355 P2(1)/c R = 0.03

Gd1 .O33 4.148(2) O21 .O52 2.834(3)

Gd1 .O43 4.166(2) O21 .C22 2.852(3)

Gd1 .O53 4.175(2) O21 .O22 2.601(3)

Gd1 .C113 3.386(2) O21 .O11 3.208(3)

Gd1 .C213 3.439(3) O21 .N2 2.635(3)

Gd1 .H1 3.90(4) O22 .O21 2.601(3)

Gd1 .H2 3.87(4) O22 .O51 2.922(3)

Gd1 .H11B 3.4100 O22 .O31 2.796(3)

Gd1 .H11C 3.9500 O23 .N2 2.909(5)

Gd1 .H21A 3.4900 O23 .C25 2.835(7)

O11 .O12 2.616(3) O23 .O13_c 2.678(5)

O11 .O21 3.208(3) O23 .O42_c 3.056(6)

O11 .O32 3.015(3) O23 .C22 3.356(6)

O11 .O42 3.128(3) O23 .O43_c 3.097(5)

O11 .O52 2.742(3) O24 .N2 2.829(8)

O11 .N1 2.640(3) O24 .C16 3.341(10)

O11 .C12 2.847(3) O24 .C26 2.653(10)

O11 .C11_a 3.306(4) O24 .N1 3.071(9)

O12 .O21 2.834(3) O24 .C24 1.822(16)

O12 .O11 2.616(3) O24 .O23 2.857(10)

O12 .O31 2.897(3) O24 .O52 2.835(9)

O12 .O32 3.067(3) O24 .C12 3.419(9)

O13 .O42 3.181(4) O31 .C21_d 3.349(4)

O13 .C15 2.822(7) O31 .O22 2.796(3)

O13 .N1 2.738(4) O31 .O12 2.897(3)

O13 .O23_b 2.678(5) O31 .O41 2.873(3)

O21 .O12 2.834(3) O31 .O32 2.155(3)

O21 .O51 2.997(3) O32 .O41 2.944(3)

Table S8 - Contact Distances (Angstrom) (continued)

for: fa355 P2(1)/c R = 0.03

O32 .O11 3.015(3) O52 .O24 2.835(9)

O32 .O31 2.155(3) O52 .O11 2.742(3)

O32 .O12 3.067(3) O52 .O42 2.802(3)

O32 .O42 2.978(3) O52 .O21 2.834(3)

O33 .C22_a 3.288(4) O53 .Gd1 4.175(2)

O33 .C21_d 3.327(4) O53 .C14_c 3.240(5)

O33 .Gd1 4.148(2) O53 .C22_b 3.138(3)

O41 .O42 2.161(3) O53 .C15_c 3.251(6)

O41 .O51 2.852(3) N1 .O13 2.738(4)

O41 .C12_e 3.338(3) N1 .O24 3.071(9)

O41 .O32 2.944(3) N1 .O11 2.640(3)

O41 .O31 2.873(3) N1 .C112 2.879(3)

O42 .O11 3.128(3) N2 .C212 2.866(3)

O42 .O51 2.945(3) N2 .O23 2.909(5)

O42 .O13 3.181(4) N2 .O24 2.829(8)

O42 .O41 2.161(3) N2 .O21 2.635(3)

O42 .O23_b 3.056(6) N3 .O41 3.057(3)

O42 .O32 2.978(3) N3 .O12 3.193(3)

O42 .O52 2.802(3) N4 .O32 3.198(3)

O43 .O23_b 3.097(5) N4 .O51 3.028(3)

O43 .C12_e 3.411(4) N5 .O21 3.131(3)

O43 .Gd1 4.166(2) N5 .O42 3.064(3)

O51 .O21 2.997(3) O11 .H1 1.98(4)

O51 .O22 2.922(3) O12 .H114 2.6700

O51 .O42 2.945(3) O13 .H1 2.40(4)

O51 .O41 2.852(3) O13 .H11A_a 2.7500

O51 .O52 2.157(3) O13 .H15B 2.4100

O52 .O51 2.157(3) O21 .H2 1.90(3)

Table S8 - Contact Distances (Angstrom) (continued)

for: fa355 P2(1)/c R = 0.03

O22 .H214 2.6800 O53 .H216_b 2.6900

O23 .H13_c 2.3400 O53 .H22_b 2.2700

O23 .H25C 2.4200 N1 .H16B 2.6100

O24 .H16B 2.5000 N1 .H14A 2.5900

O24 .H14A 2.7400 N1 .H15B 2.6600

O24 .H24A 2.2400 N1 .H15C 2.5800

O24 .H26B 2.1900 N1 .H16A 2.7000

O24 .H2 2.57(4) N2 .H26C 2.6000

O31 .H11B 2.6500 N2 .H24B 2.6000

O31 .H21A 2.5100 N2 .H27A 2.5100

O32 .H11C_a 2.4800 N2 .H26B 2.5600

O33 .H26C_a 2.7600 N2 .H25B 2.6300

O33 .H25B_a 2.5500 N2 .H25C 2.7300

O33 .H21B_d 2.8400 N2 .H24 2.8700

O41 .H12_e 2.4000 N4 .H23_b 2.7500

O41 .H21A 2.8100 N5 .H14B_c 2.9100

O42 .H13 2.5000 N5 .H24 2.8800

O42 .H23_b 2.5200 C11 .O21 3.247(4)

O42 .H114_a 2.6900 C11 .O31 3.194(4)

O43 .H26A_e 2.7300 C11 .C114 2.839(4)

O43 .H12_e 2.7700 C11 .O11_f 3.306(4)

O43 .H23_b 2.4800 C12 .O24 3.419(9)

O52 .H14A 2.8100 C12 .O11 2.847(3)

O52 .H24 2.0700 C12 .O43_g 3.411(4)

O52 .H13 2.6300 C12 .C15 3.150(5)

O53 .H25C_b 2.8000 C12 .C16 2.955(5)

O53 .H14B_c 2.5500 C12 .O41_g 3.338(3)

O53 .H15A_c 2.6600 C14 .O53_b 3.240(5)

Table S8 - Contact Distances (Angstrom) (continued)

for: fa355 P2(1)/c R = 0.03

C15 .O13 2.822(7) C113 .O11 2.360(3)

C15 .C12 3.150(5) C113 .O21 3.374(3)

C15 .O53_b 3.251(6) C114 .C215_a 3.340(4)

C16 .C12 2.955(5) C114 .C111 2.793(4)

C16 .O24 3.341(10) C114 .C11 2.839(4)

C21 .O33_d 3.327(4) C115 .C215_a 3.469(5)

C21 .O31_d 3.349(4) C115 .C112 2.810(4)

C21 .C214 2.829(5) C115 .C115_h 3.562(4)

C21 .O31 3.014(4) C115 .C214_a 3.424(5)

C22 .O21 2.852(3) C116 .C214_a 3.583(4)

C22 .O33_f 3.288(4) C116 .C113 2.779(4)

C22 .C26 3.536(5) C211 .C214 2.786(4)

C22 .O53_c 3.138(3) C212 .O51 3.311(3)

C22 .C24 3.346(16) C212 .N2 2.866(3)

C22 .C27 3.39(3) C212 .O22 2.334(3)

C22 .C25 2.869(5) C212 .C215 2.816(4)

C22 .O23 3.356(6) C213 .C216 2.776(4)

C24 .C22 3.346(16) C213 .O21 2.355(3)

C25 .O23 2.835(7) C213 .O51 3.317(3)

C25 .C22 2.869(5) C214 .C211 2.786(4)

C26 .C22 3.536(5) C214 .C115_f 3.424(5)

C26 .O24 2.653(10) C214 .C116_f 3.583(4)

C27 .C22 3.39(3) C214 .C21 2.829(5)

C111 .C114 2.793(4) C215 .C212 2.816(4)

C112 .C115 2.810(4) C215 .C115_f 3.469(5)

C112 .N1 2.879(3) C215 .C114_f 3.340(4)

C112 .O12 2.336(3) C216 .C213 2.776(4)

C113 .C116 2.779(4) C11 .H114 2.5600

Table S8 - Contact Distances (Angstrom) (continued)

for: fa355 P2(1)/c R = 0.03

C12 .H116 2.6200 C23 .H22 2.6600

C12 .H26B 3.0900 C24 .H26B 2.8200

C12 .H16B 3.0400 C24 .H25A 2.7000

C12 .H16A 2.7800 C24 .H2 2.77(4)

C12 .H15C 2.8800 C24 .H25C 2.5400

C13 .H12 2.6400 C24 .H26A 2.7900

C13 .H13 2.9300 C25 .H24A 2.6600

C14 .H1 2.40(4) C25 .H22 2.5100

C14 .H15A 2.7500 C25 .H27A 2.8700

C14 .H15B 2.6000 C25 .H26A 2.6800

C14 .H16B 2.6800 C25 .H26C 2.6400

C14 .H16C 2.6500 C25 .H27B 2.7500

C15 .H16C 2.7500 C25 .H23 2.5000

C15 .H1 2.91(4) C26 .H27B 2.6100

C15 .H14B 2.7100 C26 .H25A 2.6300

C15 .H16A 2.6700 C26 .H24B 2.8000

C16 .H15C 2.7600 C26 .H25B 2.6900

C16 .H14B 2.6900 C26 .H24A 2.7700

C16 .H12 2.7500 C26 .H2 2.59(3)

C16 .H14A 2.6600 C27 .H26B 2.4700

C16 .H15A 2.6600 C27 .H25A 2.8500

C21 .H15C_e 2.9600 C27 .H26A 2.5700

C21 .H214 2.5300 C27 .H25C 2.8100

C22 .H25C 2.8000 C27 .H2 2.59(4)

C22 .H25B 2.7900 C27 .H23 2.2100

C22 .H216 2.6200 C111 .H1 2.51(4)

C23 .H24 2.8700 C111 .H26B 2.8300

C23 .H23 2.5900 C112 .H1 2.55(4)

Table S8 - Contact Distances (Angstrom) (continued)

for: fa355 P2(1)/c R = 0.03

C113 .H11C 2.5800 H2 .C211 2.48(4)

C113 .H11A 2.6700 H2 .C212 2.47(3)

C114 .H11C 2.7800 H2 .C27 2.59(4)

C114 .H11A 2.7700 H2 .H26B 2.4000

C115 .H115_h 3.0500 H2 .H24 2.4800

C116 .H115_h 3.0400 H11A .C113 2.6700

C116 .H12 2.5900 H11A .C114 2.7700

C211 .H2 2.48(4) H11A .H114 2.2600

C212 .H2 2.47(3) H11A .O13_f 2.7500

C213 .H21B 2.5900 H11B .Gd1 3.4100

C213 .H21C 2.6700 H11B .O31 2.6500

C214 .H21C 2.8100 H11C .Gd1 3.9500

C214 .H21B 2.7100 H11C .C113 2.5800

C216 .H22 2.5900 H11C .C114 2.7800

H1 .Gd1 3.90(4) H11C .H114 2.4400

H1 .O11 1.98(4) H11C .O32_f 2.4800

H1 .O13 2.40(4) H12 .C13 2.6400

H1 .C14 2.40(4) H12 .C16 2.7500

H1 .C15 2.91(4) H12 .C116 2.5900

H1 .C111 2.51(4) H12 .H16A 2.2700

H1 .C112 2.55(4) H12 .H116 2.4000

H1 .H13 2.4600 H12 .O41_g 2.4000

H1 .H14A 2.4900 H12 .O43_g 2.7700

H2 .Gd1 3.87(4) H13 .O42 2.5000

H2 .O21 1.90(3) H13 .O52 2.6300

H2 .O24 2.57(4) H13 .C13 2.9300

H2 .C24 2.77(4) H13 .H1 2.4600

H2 .C26 2.59(3) H13 .H14A 2.0400

Table S8 - Contact Distances (Angstrom) (continued)

for: fa355 P2(1)/c R = 0.03

H13 .H14B 2.5100 H15C .C21_g 2.9600

H13 .O23_b 2.3400 H15C .H21B_g 2.3600

H13 .H23_b 2.4300 H16A .N1 2.7000

H14A .O52 2.8100 H16A .C12 2.7800

H14A .N1 2.5900 H16A .C15 2.6700

H14A .O24 2.7400 H16A .H12 2.2700

H14A .C16 2.6600 H16A .H15C 2.5700

H14A .H1 2.4900 H16B .N1 2.6100

H14A .H13 2.0400 H16B .O24 2.5000

H14A .H16B 2.4800 H16B .C12 3.0400

H14A .H24 2.4700 H16B .C14 2.6800

H14B .C15 2.7100 H16B .H14A 2.4800

H14B .C16 2.6900 H16C .C14 2.6500

H14B .H13 2.5100 H16C .C15 2.7500

H14B .H16C 2.4800 H16C .H14B 2.4800

H14B .O53_b 2.5500 H16C .H15A 2.5300

H14B .N5_b 2.9100 H21A .Gd1 3.4900

H15A .C14 2.7500 H21A .O31 2.5100

H15A .C16 2.6600 H21A .O41 2.8100

H15A .H16C 2.5300 H21A .H21A_d 2.5500

H15A .O53_b 2.6600 H21B .C213 2.5900

H15B .O13 2.4100 H21B .C214 2.7100

H15B .N1 2.6600 H21B .H214 2.2700

H15B .C14 2.6000 H21B .O33_d 2.8400

H15C .N1 2.5800 H21B .H15C_e 2.3600

H15C .C12 2.8800 H21C .C213 2.6700

H15C .C16 2.7600 H21C .C214 2.8100

H15C .H16A 2.5700 H21C .H214 2.3600

Table S8 - Contact Distances (Angstrom) (continued)

for: fa355 P2(1)/c R = 0.03

H22 .C23 2.6600 H24A .H23 2.1200

H22 .C25 2.5100 H24A .H25A 2.5400

H22 .C216 2.5900 H24B .N2 2.6000

H22 .H25B 2.3400 H24B .C26 2.8000

H22 .H25C 2.2600 H24B .H23 2.5900

H22 .H216 2.4000 H25A .C24 2.7000

H22 .O53_c 2.2700 H25A .C26 2.6300

H23 .C23 2.5900 H25A .C27 2.8500

H23 .C25 2.5000 H25A .H24A 2.5400

H23 .H24A 2.1200 H25A .H26A 2.4600

H23 .H24B 2.5900 H25B .H22 2.3400

H23 .H25C 1.9000 H25B .H26C 2.4900

H23 .O42_c 2.5200 H25B .O33_f 2.5500

H23 .O43_c 2.4800 H25B .C26 2.6900

H23 .N4_c 2.7500 H25B .N2 2.6300

H23 .H13_c 2.4300 H25B .C22 2.7900

H24 .N5 2.8800 H25C .O23 2.4200

H24 .C23 2.8700 H25C .N2 2.7300

H24 .C24 2.1900 H25C .C22 2.8000

H24 .H2 2.4800 H25C .H22 2.2600

H24 .O23 2.8900 H25C .H23 1.9000

H24 .O52 2.0700 H25C .O53_c 2.8000

H24 .N2 2.8700 H25C .C27 2.8100

H24 .H27A 2.0800 H25C .C24 2.5400

H24 .H14A 2.4700 H26A .C25 2.6800

H24 .H24B 1.2400 H26A .C24 2.7900

H24A .C25 2.6600 H26A .O43_g 2.7300

H24A .C26 2.7700 H26A .H27B 2.4500

Table S8 - Contact Distances (Angstrom) (continued)

for: fa355 P2(1)/c R = 0.03

H26A .C27 2.5700 H27B .H24B 1.4500

H26A .H25A 2.4600 H114 .O12 2.6700

H26B .N2 2.5600 H114 .C11 2.5600

H26B .O24 2.1900 H114 .H11A 2.2600

H26B .C12 3.0900 H114 .H11C 2.4400

H26B .C24 2.8200 H114 .H115 2.3500

H26B .C27 2.4700 H114 .O42_f 2.6900

H26B .H2 2.4000 H115 .H114 2.3500

H26B .C111 2.8300 H115 .H116 2.3000

H26C .N2 2.6000 H115 .C115_h 3.0500

H26C .H25B 2.4900 H115 .C116_h 3.0400

H26C .O33_f 2.7600 H116 .C12 2.6200

H26C .C25 2.6400 H116 .H12 2.4000

H27A .N2 2.5100 H116 .H115 2.3000

H27A .C25 2.8700 H214 .H21C 2.3600

H27A .H23 1.5900 H214 .O22 2.6800

H27A .H24A 1.5700 H214 .C21 2.5300

H27A .H24B 1.0600 H214 .H215 2.3500

H27A .H24 2.0800 H214 .H21B 2.2700

H27B .H26A 2.4500 H215 .H216 2.3100

H27B .O23 2.0400 H215 .H214 2.3500

H27B .C25 2.7500 H216 .C22 2.6200

H27B .C26 2.6100 H216 .H215 2.3100

H27B .H23 2.3300 H216 .O53_c 2.6900

H27B .H24A 0.2700 H216 .H22 2.4000

Table S9 - Hydrogen Bonds (Angstrom, Deg)

for: fa355 P2(1)/c R = 0.03

N1 -- H1 .. O11 0.83(4) 1.98(4) 2.640(3) 136(3) .

N1 -- H1 .. O13 0.83(4) 2.40(4) 2.738(4) 106(3) .

N2 -- H2 .. O21 0.89(4) 1.90(3) 2.635(3) 139(3) .

O13 -- H13 .. O42 0.8400 2.5000 3.181(4) 139.00 .

O13 -- H13 .. O23 0.8400 2.3400 2.678(5) 105.00 2_545

O23 -- H23 .. O42 0.8400 2.5200 3.056(6) 123.00 2_555

O23 -- H23 .. O43 0.8400 2.4800 3.097(5) 132.00 2_555

C11 -- H11C .. O32 0.9800 2.4800 3.425(4) 162.00 2_655

C12 -- H12 .. O41 0.9500 2.4000 3.338(3) 168.00 4_554

C14 -- H14B .. O53 0.9900 2.5500 3.240(5) 127.00 2_545

C15 -- H15B .. O13 0.9800 2.4100 2.822(7) 104.00 .

C16 -- H16B .. O24 0.9800 2.5000 3.341(10) 144.00 .

C21 -- H21A .. O31 0.9800 2.5100 3.014(4) 111.00 .

C22 -- H22 .. O53 0.9500 2.2700 3.138(3) 152.00 2_555

C25 -- H25B .. O33 0.9800 2.5500 3.428(5) 149.00 2_655

C25 -- H25C .. O23 0.9800 2.4200 2.835(7) 105.00 .

C26 -- H26B .. O24 0.9800 2.1900 2.653(10) 107.00 .

**fa438 P2(1)/c R = 0.02 : ay, 4 April 2016**

C o n t e n t s

===============

Table S1 - Crystal Data and Details of the Structure Determination

for: fa438 P2(1)/c R = 0.02

Table S2 - Final Coordinates and Equivalent Isotropic Displacement

Parameters of the non-Hydrogen atoms

for: fa438 P2(1)/c R = 0.02

Table S3 - Hydrogen Atom Positions and Isotropic Displacement

Parameters

for: fa438 P2(1)/c R = 0.02

Table S4 - (An)isotropic Displacement Parameters

for: fa438 P2(1)/c R = 0.02

Table S5 - Bond Distances (Angstrom)

for: fa438 P2(1)/c R = 0.02

Table S6 - Bond Angles (Degrees)

for: fa438 P2(1)/c R = 0.02

Table S7 - Torsion Angles (Degrees)

for: fa438 P2(1)/c R = 0.02

Table S8 - Contact Distances (Angstrom)

for: fa438 P2(1)/c R = 0.02

Table S9 - Hydrogen Bonds (Angstrom, Deg)

for: fa438 P2(1)/c R = 0.02

Table S1 - Crystal Data and Details of the Structure Determination

for: fa438 P2(1)/c R = 0.02

Crystal Data

Formula C24 H34 Ho N5 O15

Formula Weight 797.49

Crystal System monoclinic

Space group P21/c (No. 14)

a, b, c [Angstrom] 11.9411(5) 12.5894(5) 20.4572(9)

alpha, beta, gamma [deg] 90 90.335(2) 90

V [Ang**3] 3075.3(2)

Z 4

D(calc) [g/cm**3] 1.722

Mu(MoKa) [ /mm ] 2.651

F(000) 1600

Crystal Size [mm] 0.25 x 0.28 x 0.29

Data Collection

Temperature (K) 200

Radiation [Angstrom] MoKa 0.71073

Theta Min-Max [Deg] 1.7, 28.4

Dataset -15: 15 ; -16: 16 ; -27: 27

Tot., Uniq. Data, R(int) 28175, 7617, 0.019

Observed Data [I > 2.0 sigma(I)] 6534

Refinement

Nref, Npar 7617, 442

R, wR2, S 0.0203, 0.0505, 1.03

w = ^2^(FO^2^)+(0.0201P)^2^+3.4599P] WHERE P=(FO^2^+2FC^2^)/3'

Max. and Av. Shift/Error 0.00, 0.00

Min. and Max. Resd. Dens. [e/Ang^3] -0.76, 1.03

Table S2 - Final Coordinates and Equivalent Isotropic Displacement

Parameters of the non-Hydrogen atoms

for: fa438 P2(1)/c R = 0.02

Atom x y z U(eq) [Ang^2]

---- --- --- --- -----------

Ho1 0.34648(2) 0.39127(2) 0.32309(2) 0.0217(1)

O11 0.36045(13) 0.31467(12) 0.22409(7) 0.0252(4)

O12 0.50354(14) 0.46399(12) 0.25327(7) 0.0273(4)

O13 0.1366(3) 0.1037(3) 0.23322(15) 0.1142(17)

O21 0.28653(14) 0.54131(13) 0.27106(7) 0.0279(5)

O22 0.34474(14) 0.55889(13) 0.39290(7) 0.0294(5)

*O23 -0.0592(4) 0.5733(5) 0.1461(2) 0.078(2)

*O24 0.1055(7) 0.4092(5) 0.1387(3) 0.079(3)

O31 0.51826(14) 0.41588(13) 0.38855(8) 0.0308(5)

O32 0.50475(15) 0.26703(14) 0.33741(8) 0.0360(5)

O33 0.64853(18) 0.29726(18) 0.40050(11) 0.0572(8)

O41 0.32884(16) 0.30272(14) 0.43246(8) 0.0351(5)

O42 0.26794(15) 0.21523(14) 0.34888(8) 0.0339(5)

O43 0.2431(2) 0.15226(17) 0.44652(10) 0.0555(8)

O51 0.15921(15) 0.41900(15) 0.36896(9) 0.0383(6)

O52 0.15379(15) 0.35801(15) 0.27069(9) 0.0385(6)

O53 -0.00070(17) 0.39181(18) 0.32160(15) 0.0656(9)

N1 0.24849(17) 0.20716(17) 0.13473(10) 0.0295(6)

N2 0.17757(17) 0.61665(17) 0.16890(9) 0.0296(6)

N3 0.56008(17) 0.32520(18) 0.37602(10) 0.0335(6)

N4 0.27880(19) 0.22122(17) 0.41038(10) 0.0340(6)

N5 0.10112(18) 0.38949(16) 0.32018(12) 0.0365(7)

C11 0.5553(2) 0.5652(2) 0.26677(13) 0.0391(8)

Table S2 - Final Coordinates and Equivalent Isotropic Displacement

Parameters of the non-Hydrogen atoms (continued)

for: fa438 P2(1)/c R = 0.02

Atom x y z U(eq) [Ang^2]

---- --- --- --- -----------

C12 0.3196(2) 0.24506(19) 0.09391(11) 0.0277(7)

C13 0.1527(2) 0.1358(2) 0.11908(13) 0.0381(8)

C14 0.0769(3) 0.1396(3) 0.17794(17) 0.0543(10)

C15 0.1970(3) 0.0253(3) 0.1087(2) 0.0802(16)

C16 0.0905(4) 0.1769(5) 0.0598(2) 0.1076(19)

C21 0.3704(3) 0.5651(2) 0.46167(11) 0.0417(9)

C22 0.1681(2) 0.70311(19) 0.20186(12) 0.0303(7)

C23 0.1291(2) 0.5925(2) 0.10367(12) 0.0342(8)

*C24 0.0217(12) 0.5245(16) 0.1140(10) 0.049(4)

C25 0.0883(3) 0.6927(3) 0.07000(16) 0.0649(13)

C26 0.2220(3) 0.5439(4) 0.06393(16) 0.0717(13)

*C27 0.0530(18) 0.504(2) 0.1155(14) 0.056(5)

C111 0.40668(18) 0.31714(18) 0.11093(10) 0.0251(6)

C112 0.41996(18) 0.35246(17) 0.17626(10) 0.0231(6)

C113 0.49822(18) 0.43465(18) 0.18827(10) 0.0247(6)

C114 0.5591(2) 0.4791(2) 0.13884(12) 0.0325(7)

C115 0.5465(2) 0.4417(2) 0.07455(12) 0.0360(8)

C116 0.4722(2) 0.3624(2) 0.06083(11) 0.0321(7)

C211 0.20862(19) 0.71547(18) 0.26703(11) 0.0284(7)

C212 0.26316(18) 0.63103(18) 0.29940(11) 0.0251(6)

C213 0.29198(19) 0.64658(18) 0.36610(11) 0.0261(6)

C214 0.2678(2) 0.7389(2) 0.39817(12) 0.0351(7)

C215 0.2144(2) 0.8222(2) 0.36456(14) 0.0408(8)

C216 0.1853(2) 0.8116(2) 0.30057(13) 0.0375(8)

U(eq) = 1/3 of the trace of the orthogonalized U Tensor

Starred Atom sites have a S.O.F less than 1.0

Table S3 - Hydrogen Atom Positions and Isotropic Displacement

Parameters

for: fa438 P2(1)/c R = 0.02

Atom x y z U(iso) [Ang^2]

---- --- --- --- -----------

H1 0.258(2) 0.222(2) 0.1723(14) 0.035(8)

H2 0.214(2) 0.568(2) 0.1891(13) 0.031(7)

H11A 0.63490 0.56200 0.25560 0.0590

H11B 0.54750 0.58200 0.31330 0.0590

H11C 0.51850 0.62050 0.24060 0.0590

H12 0.31350 0.22350 0.04950 0.0330

H13 0.15850 0.15610 0.25530 0.1710

H14A 0.05070 0.21330 0.18520 0.0650

H14B 0.01050 0.09390 0.17040 0.0650

H15A 0.13630 -0.02080 0.09310 0.1200

H15B 0.22680 -0.00240 0.15000 0.1200

H15C 0.25680 0.02710 0.07610 0.1200

H16A 0.13780 0.16940 0.02110 0.1620

H16B 0.07200 0.25200 0.06630 0.1620

H16C 0.02140 0.13600 0.05370 0.1620

H21A 0.40240 0.49750 0.47640 0.0630

H21B 0.30170 0.57970 0.48600 0.0630

H21C 0.42450 0.62240 0.46940 0.0630

H22 0.13210 0.76200 0.18160 0.0360

*H23 -0.05290 0.56040 0.18620 0.1170

*H24 0.10370 0.40800 0.17970 0.1190

*H24A -0.00750 0.50250 0.07070 0.0580

*H24B 0.04250 0.45930 0.13820 0.0580

H25A 0.06500 0.67580 0.02520 0.0970

H25B 0.14900 0.74510 0.06900 0.0970

Table S3 - Hydrogen Atom Positions and Isotropic Displacement

Parameters (continued)

for: fa438 P2(1)/c R = 0.02

Atom x y z U(iso) [Ang^2]

---- --- --- --- -----------

H25C 0.02460 0.72200 0.09400 0.0970

H26A 0.19310 0.52410 0.02070 0.1080

H26B 0.25050 0.48050 0.08630 0.1080

H26C 0.28280 0.59550 0.05900 0.1080

*H27A -0.00340 0.52690 0.14790 0.0670

*H27B 0.01270 0.48770 0.07430 0.0670

H114 0.60980 0.53540 0.14800 0.0390

H115 0.58990 0.47170 0.04050 0.0430

H116 0.46440 0.33740 0.01720 0.0380

H214 0.28690 0.74670 0.44310 0.0420

H215 0.19850 0.88670 0.38680 0.0490

H216 0.14940 0.86840 0.27830 0.0450

=======================================================

The Temperature Factor has the Form of Exp(-T) Where

T = 8*(Pi**2)*U*(Sin(Theta)/Lambda)**2 for Isotropic Atoms

Table S4 - (An)isotropic Displacement Parameters

for: fa438 P2(1)/c R = 0.02

Atom U(1,1) or U U(2,2) U(3,3) U(2,3) U(1,3) U(1,2)

---- ------ ------ ------ ------ ------ ------

Ho1 0.0265(1) 0.0228(1) 0.0160(1) 0.0004(1) -0.0023(1) 0.0010(1)

O11 0.0297(8) 0.0281(8) 0.0179(7) 0.0003(6) 0.0020(6) -0.0056(7)

O12 0.0315(8) 0.0271(8) 0.0232(7) 0.0006(6) -0.0027(6) -0.0068(7)

O13 0.117(3) 0.173(4) 0.0525(16) 0.0195(19)-0.0108(16) -0.094(3)

O21 0.0363(9) 0.0255(8) 0.0217(7) -0.0014(6) -0.0038(6) 0.0045(7)

O22 0.0392(9) 0.0292(8) 0.0197(7) -0.0031(6) -0.0066(7) 0.0038(7)

O23 0.049(3) 0.127(5) 0.059(3) -0.003(3) 0.005(2) 0.000(3)

O24 0.123(6) 0.057(4) 0.057(4) 0.001(3) -0.008(4) -0.012(4)

O31 0.0330(9) 0.0301(9) 0.0293(8) -0.0031(7) -0.0061(7) 0.0052(7)

O32 0.0416(10) 0.0338(9) 0.0324(9) -0.0078(7) -0.0089(7) 0.0062(8)

O33 0.0464(12) 0.0624(14) 0.0625(14)-0.0149(11)-0.0271(10) 0.0255(11)

O41 0.0491(11) 0.0342(9) 0.0219(8) 0.0011(7) -0.0022(7) -0.0058(8)

O42 0.0459(10) 0.0316(9) 0.0240(8) 0.0002(7) -0.0029(7) -0.0034(8)

O43 0.0833(16) 0.0458(12) 0.0375(11) 0.0171(9) 0.0035(10)-0.0186(11)

O51 0.0367(10) 0.0403(10) 0.0378(10) -0.0056(8) 0.0052(8) -0.0011(8)

O52 0.0367(10) 0.0412(10) 0.0375(10) -0.0058(8) -0.0065(8) 0.0005(8)

O53 0.0244(10) 0.0533(14) 0.119(2)-0.0217(13) 0.0016(11) -0.0024(9)

N1 0.0335(11) 0.0328(11) 0.0221(9) -0.0013(8) -0.0021(8) -0.0043(8)

N2 0.0322(10) 0.0316(11) 0.0249(9) 0.0040(8) -0.0061(8) 0.0065(9)

N3 0.0346(11) 0.0377(11) 0.0280(10) -0.0026(9) -0.0073(8) 0.0057(9)

N4 0.0440(12) 0.0317(11) 0.0262(10) 0.0048(8) -0.0003(9) -0.0014(9)

N5 0.0285(11) 0.0234(10) 0.0576(14) -0.0009(9) 0.0000(10) -0.0017(9)

C11 0.0484(16) 0.0325(13) 0.0362(13)-0.0010(11)-0.0032(11)-0.0158(12)

Table S4 - (An)isotropic Displacement Parameters (continued)

for: fa438 P2(1)/c R = 0.02

Atom U(1,1) or U U(2,2) U(3,3) U(2,3) U(1,3) U(1,2)

---- ------ ------ ------ ------ ------ ------

C12 0.0330(12) 0.0309(12) 0.0192(10) -0.0003(8) -0.0010(9) 0.0032(10)

C13 0.0348(13) 0.0434(14) 0.0360(13)-0.0059(11)-0.0014(10)-0.0132(11)

C14 0.0388(15) 0.0543(18) 0.070(2)-0.0210(15) 0.0157(14)-0.0155(14)

C15 0.060(2) 0.055(2) 0.126(4) -0.045(2) 0.037(2)-0.0218(17)

C16 0.091(3) 0.148(4) 0.083(3) 0.047(3) -0.057(2) -0.071(3)

C21 0.0611(18) 0.0434(15) 0.0204(11)-0.0047(10)-0.0090(11) 0.0075(14)

C22 0.0293(12) 0.0284(12) 0.0331(12) 0.0036(9) -0.0062(9) 0.0047(9)

C23 0.0394(14) 0.0396(14) 0.0234(11)-0.0001(10)-0.0078(10) 0.0051(11)

C24 0.040(7) 0.062(7) 0.044(4) 0.001(4) -0.010(5) -0.011(5)

C25 0.092(3) 0.056(2) 0.0463(17) 0.0036(15)-0.0373(18) 0.0132(19)

C26 0.074(2) 0.100(3) 0.0411(17)-0.0244(19)-0.0062(16) 0.035(2)

C27 0.050(11) 0.073(11) 0.044(5) -0.004(6) -0.020(8) -0.011(7)

C111 0.0273(11) 0.0285(11) 0.0196(10) 0.0028(8) 0.0009(8) 0.0029(9)

C112 0.0249(11) 0.0235(10) 0.0208(10) 0.0038(8) 0.0001(8) 0.0032(8)

C113 0.0249(11) 0.0275(11) 0.0218(10) 0.0031(8) -0.0018(8) 0.0012(9)

C114 0.0304(12) 0.0339(13) 0.0332(12) 0.0067(10) 0.0013(10)-0.0058(10)

C115 0.0347(13) 0.0463(15) 0.0272(12) 0.0089(11) 0.0078(10)-0.0029(12)

C116 0.0342(13) 0.0419(14) 0.0201(10) 0.0035(9) 0.0028(9) 0.0018(11)

C211 0.0270(11) 0.0261(11) 0.0319(12) -0.0015(9) -0.0029(9) 0.0013(9)

C212 0.0239(11) 0.0262(11) 0.0253(10) -0.0015(8) -0.0005(8) 0.0001(9)

C213 0.0267(11) 0.0251(11) 0.0266(11) -0.0010(8) -0.0027(9) -0.0004(9)

C214 0.0377(13) 0.0347(13) 0.0328(12)-0.0110(10)-0.0067(10) 0.0018(11)

C215 0.0431(15) 0.0304(13) 0.0488(15)-0.0145(11)-0.0085(12) 0.0089(12)

C216 0.0385(14) 0.0285(13) 0.0455(14)-0.0034(11)-0.0094(11) 0.0083(11)

=======================================================

The Temperature Factor has the Form of Exp(-T) Where

T = 8*(Pi**2)*U*(Sin(Theta)/Lambda)**2 for Isotropic Atoms

T = 2*(Pi**2)*Sumij(h(i)*h(j)*U(i,j)*Astar(i)*Astar(j)), for

Anisotropic Atoms. Astar(i) are Reciprocal Axial Lengths and

h(i) are the Reflection Indices.

Table S5 - Bond Distances (Angstrom)

for: fa438 P2(1)/c R = 0.02

Ho1 -O11 2.2502(15) N1 -C12 1.286(3)

Ho1 -O12 2.5351(16) N1 -C13 1.488(3)

Ho1 -O21 2.2813(16) N2 -C22 1.286(3)

Ho1 -O22 2.5482(16) N2 -C23 1.483(3)

Ho1 -O31 2.4627(17) O13 -H13 0.8400

Ho1 -O32 2.4693(18) O23 -H23 0.8400

Ho1 -O41 2.5097(17) O24 -H24 0.8400

Ho1 -O42 2.4648(18) N1 -H1 0.80(3)

Ho1 -O51 2.4551(18) N2 -H2 0.86(3)

Ho1 -O52 2.5671(18) C12 -C111 1.422(3)

O11 -C112 1.303(3) C13 -C14 1.511(4)

O12 -C11 1.442(3) C13 -C16 1.510(5)

O12 -C113 1.381(3) C13 -C15 1.504(5)

O13 -C14 1.408(5) C22 -C211 1.424(3)

O21 -C212 1.301(3) C23 -C24 1.557(17)

O22 -C21 1.440(3) C23 -C25 1.516(4)

O22 -C213 1.383(3) C23 -C26 1.509(4)

O23 -C24 1.323(18) C23 -C27 1.46(2)

O24 -C27 1.43(3) C111 -C116 1.413(3)

O31 -N3 1.273(3) C111 -C112 1.417(3)

O32 -N3 1.261(3) C112 -C113 1.415(3)

O33 -N3 1.218(3) C113 -C114 1.369(3)

O41 -N4 1.269(3) C114 -C115 1.404(3)

O42 -N4 1.266(3) C115 -C116 1.364(3)

O43 -N4 1.219(3) C211 -C212 1.410(3)

O51 -N5 1.268(3) C211 -C216 1.420(3)

O52 -N5 1.259(3) C212 -C213 1.419(3)

O53 -N5 1.217(3) C213 -C214 1.366(3)

Table S5 - Bond Distances (Angstrom) (continued)

for: fa438 P2(1)/c R = 0.02

C214 -C215 1.405(4) C22 -H22 0.9500

C215 -C216 1.359(4) C24 -H24A 0.9900

C11 -H11A 0.9800 C24 -H24B 0.9900

C11 -H11B 0.9800 C25 -H25A 0.9800

C11 -H11C 0.9800 C25 -H25B 0.9800

C12 -H12 0.9500 C25 -H25C 0.9800

C14 -H14A 0.9900 C26 -H26A 0.9800

C14 -H14B 0.9900 C26 -H26B 0.9800

C15 -H15A 0.9800 C26 -H26C 0.9800

C15 -H15B 0.9800 C27 -H27B 0.9900

C15 -H15C 0.9800 C27 -H27A 0.9900

C16 -H16A 0.9800 C114 -H114 0.9500

C16 -H16B 0.9800 C115 -H115 0.9500

C16 -H16C 0.9800 C116 -H116 0.9500

C21 -H21A 0.9800 C214 -H214 0.9500

C21 -H21B 0.9800 C215 -H215 0.9500

C21 -H21C 0.9800 C216 -H216 0.9500

Table S6 - Bond Angles (Degrees)

for: fa438 P2(1)/c R = 0.02

O11 -Ho1 -O12 65.71(5) O22 -Ho1 -O51 69.98(6)

O11 -Ho1 -O21 87.69(6) O22 -Ho1 -O52 111.03(6)

O11 -Ho1 -O22 149.34(5) O31 -Ho1 -O32 51.74(6)

O11 -Ho1 -O31 118.52(6) O31 -Ho1 -O41 69.21(6)

O11 -Ho1 -O32 76.97(6) O31 -Ho1 -O42 108.27(6)

O11 -Ho1 -O41 128.25(6) O31 -Ho1 -O51 122.14(6)

O11 -Ho1 -O42 80.66(6) O31 -Ho1 -O52 171.61(6)

O11 -Ho1 -O51 118.52(6) O32 -Ho1 -O41 71.40(6)

O11 -Ho1 -O52 67.99(6) O32 -Ho1 -O42 72.36(6)

O12 -Ho1 -O21 70.69(5) O32 -Ho1 -O51 137.98(6)

O12 -Ho1 -O22 91.44(5) O32 -Ho1 -O52 129.03(6)

O12 -Ho1 -O31 69.17(5) O41 -Ho1 -O42 51.37(6)

O12 -Ho1 -O32 74.18(5) O41 -Ho1 -O51 68.96(6)

O12 -Ho1 -O41 136.80(6) O41 -Ho1 -O52 102.72(6)

O12 -Ho1 -O42 136.80(5) O42 -Ho1 -O51 72.39(6)

O12 -Ho1 -O51 147.40(6) O42 -Ho1 -O52 66.51(6)

O12 -Ho1 -O52 119.20(6) O51 -Ho1 -O52 50.70(6)

O21 -Ho1 -O22 64.68(5) Ho1 -O11 -C112 124.28(13)

O21 -Ho1 -O31 114.06(6) Ho1 -O12 -C11 121.93(13)

O21 -Ho1 -O32 144.85(6) Ho1 -O12 -C113 114.57(13)

O21 -Ho1 -O41 139.11(6) C11 -O12 -C113 115.97(17)

O21 -Ho1 -O42 136.52(6) Ho1 -O21 -C212 125.36(13)

O21 -Ho1 -O51 77.09(6) Ho1 -O22 -C21 126.16(14)

O21 -Ho1 -O52 70.26(6) Ho1 -O22 -C213 116.37(12)

O22 -Ho1 -O31 66.46(5) C21 -O22 -C213 115.96(18)

O22 -Ho1 -O32 117.83(6) Ho1 -O31 -N3 95.98(13)

O22 -Ho1 -O41 82.37(5) Ho1 -O32 -N3 95.99(14)

O22 -Ho1 -O42 128.34(5) Ho1 -O41 -N4 94.80(13)

Table S6 - Bond Angles (Degrees) (continued)

for: fa438 P2(1)/c R = 0.02

Ho1 -O42 -N4 97.02(14) O13 -C14 -C13 109.1(3)

Ho1 -O51 -N5 98.79(14) N2 -C22 -C211 123.6(2)

Ho1 -O52 -N5 93.65(14) N2 -C23 -C24 107.9(8)

C12 -N1 -C13 126.4(2) N2 -C23 -C25 111.2(2)

C22 -N2 -C23 127.6(2) N2 -C23 -C26 106.5(2)

O31 -N3 -O32 116.25(19) N2 -C23 -C27 104.3(11)

O31 -N3 -O33 121.1(2) C24 -C23 -C26 117.3(8)

O32 -N3 -O33 122.7(2) C25 -C23 -C26 109.1(3)

O41 -N4 -O42 116.6(2) C24 -C23 -C25 104.9(7)

O41 -N4 -O43 121.7(2) C26 -C23 -C27 103.9(10)

O42 -N4 -O43 121.7(2) C25 -C23 -C27 120.8(10)

O51 -N5 -O52 116.9(2) O23 -C24 -C23 114.6(14)

O51 -N5 -O53 121.1(2) O24 -C27 -C23 114.9(15)

O52 -N5 -O53 122.1(2) C12 -C111 -C116 119.1(2)

C14 -O13 -H13 110.00 C112 -C111 -C116 119.9(2)

C24 -O23 -H23 110.00 C12 -C111 -C112 120.60(19)

C27 -O24 -H24 109.00 O11 -C112 -C113 119.96(18)

C13 -N1 -H1 117.0(18) C111 -C112 -C113 117.62(19)

C12 -N1 -H1 116.6(18) O11 -C112 -C111 122.38(19)

C22 -N2 -H2 113.5(18) O12 -C113 -C114 125.5(2)

C23 -N2 -H2 118.8(17) C112 -C113 -C114 121.6(2)

N1 -C12 -C111 124.2(2) O12 -C113 -C112 112.92(18)

C14 -C13 -C16 109.6(3) C113 -C114 -C115 120.0(2)

N1 -C13 -C14 105.8(2) C114 -C115 -C116 120.3(2)

N1 -C13 -C15 108.6(2) C111 -C116 -C115 120.6(2)

N1 -C13 -C16 109.9(3) C22 -C211 -C212 120.7(2)

C14 -C13 -C15 110.8(3) C22 -C211 -C216 118.6(2)

C15 -C13 -C16 112.1(3) C212 -C211 -C216 120.5(2)

Table S6 - Bond Angles (Degrees) (continued)

for: fa438 P2(1)/c R = 0.02

O21 -C212 -C211 123.0(2) C13 -C16 -H16A 109.00

C211 -C212 -C213 117.2(2) C13 -C16 -H16B 109.00

O21 -C212 -C213 119.8(2) C13 -C16 -H16C 109.00

O22 -C213 -C214 125.9(2) H16A -C16 -H16B 110.00

C212 -C213 -C214 121.9(2) H16A -C16 -H16C 110.00

O22 -C213 -C212 112.24(19) H16B -C16 -H16C 110.00

C213 -C214 -C215 119.8(2) O22 -C21 -H21A 109.00

C214 -C215 -C216 120.7(2) O22 -C21 -H21B 109.00

C211 -C216 -C215 120.0(2) O22 -C21 -H21C 109.00

O12 -C11 -H11A 110.00 H21A -C21 -H21B 109.00

O12 -C11 -H11B 109.00 H21A -C21 -H21C 110.00

O12 -C11 -H11C 109.00 H21B -C21 -H21C 109.00

H11A -C11 -H11B 109.00 N2 -C22 -H22 118.00

H11A -C11 -H11C 110.00 C211 -C22 -H22 118.00

H11B -C11 -H11C 109.00 O23 -C24 -H24A 109.00

N1 -C12 -H12 118.00 O23 -C24 -H24B 109.00

C111 -C12 -H12 118.00 C23 -C24 -H24A 109.00

O13 -C14 -H14A 110.00 C23 -C24 -H24B 109.00

O13 -C14 -H14B 110.00 H24A -C24 -H24B 108.00

C13 -C14 -H14A 110.00 C23 -C25 -H25A 109.00

C13 -C14 -H14B 110.00 C23 -C25 -H25B 109.00

H14A -C14 -H14B 108.00 C23 -C25 -H25C 110.00

C13 -C15 -H15A 109.00 H25A -C25 -H25B 109.00

C13 -C15 -H15B 110.00 H25A -C25 -H25C 109.00

C13 -C15 -H15C 109.00 H25B -C25 -H25C 109.00

H15A -C15 -H15B 110.00 C23 -C26 -H26A 109.00

H15A -C15 -H15C 109.00 C23 -C26 -H26B 109.00

H15B -C15 -H15C 109.00 C23 -C26 -H26C 110.00

Table S6 - Bond Angles (Degrees) (continued)

for: fa438 P2(1)/c R = 0.02

H26A -C26 -H26B 110.00 C116 -C115 -H115 120.00

H26A -C26 -H26C 109.00 C114 -C115 -H115 120.00

H26B -C26 -H26C 109.00 C111 -C116 -H116 120.00

C23 -C27 -H27B 109.00 C115 -C116 -H116 120.00

H27A -C27 -H27B 108.00 C213 -C214 -H214 120.00

O24 -C27 -H27A 109.00 C215 -C214 -H214 120.00

O24 -C27 -H27B 109.00 C216 -C215 -H215 120.00

C23 -C27 -H27A 108.00 C214 -C215 -H215 120.00

C115 -C114 -H114 120.00 C215 -C216 -H216 120.00

C113 -C114 -H114 120.00 C211 -C216 -H216 120.00

Table S7 - Torsion Angles (Degrees)

for: fa438 P2(1)/c R = 0.02

O12 -Ho1 -O11 -C112 -13.60(15)

O21 -Ho1 -O11 -C112 56.22(16)

O22 -Ho1 -O11 -C112 31.4(2)

O31 -Ho1 -O11 -C112 -60.03(17)

O32 -Ho1 -O11 -C112 -91.91(16)

O41 -Ho1 -O11 -C112 -145.10(15)

O42 -Ho1 -O11 -C112 -165.83(17)

O51 -Ho1 -O11 -C112 130.17(16)

O52 -Ho1 -O11 -C112 125.84(17)

O11 -Ho1 -O12 -C11 161.71(17)

O11 -Ho1 -O12 -C113 13.26(13)

O21 -Ho1 -O12 -C11 65.33(15)

O21 -Ho1 -O12 -C113 -83.12(14)

O22 -Ho1 -O12 -C11 2.86(16)

O22 -Ho1 -O12 -C113 -145.59(14)

O31 -Ho1 -O12 -C11 -61.22(15)

O31 -Ho1 -O12 -C113 150.33(15)

O32 -Ho1 -O12 -C11 -115.71(16)

O32 -Ho1 -O12 -C113 95.84(14)

O41 -Ho1 -O12 -C11 -77.52(17)

O41 -Ho1 -O12 -C113 134.03(14)

O42 -Ho1 -O12 -C11 -156.08(15)

O42 -Ho1 -O12 -C113 55.47(16)

O51 -Ho1 -O12 -C11 56.3(2)

O51 -Ho1 -O12 -C113 -92.20(16)

O52 -Ho1 -O12 -C11 118.03(15)

O52 -Ho1 -O12 -C113 -30.42(15)

O11 -Ho1 -O21 -C212 -177.19(17)

Table S7 - Torsion Angles (Degrees) (continued)

for: fa438 P2(1)/c R = 0.02

O12 -Ho1 -O21 -C212 -112.15(18)

O22 -Ho1 -O21 -C212 -10.89(16)

O31 -Ho1 -O21 -C212 -56.85(18)

O32 -Ho1 -O21 -C212 -113.89(17)

O41 -Ho1 -O21 -C212 28.7(2)

O42 -Ho1 -O21 -C212 109.00(17)

O51 -Ho1 -O21 -C212 62.84(17)

O52 -Ho1 -O21 -C212 115.39(18)

O11 -Ho1 -O22 -C21 -156.8(2)

O11 -Ho1 -O22 -C213 37.9(2)

O12 -Ho1 -O22 -C21 -116.7(2)

O12 -Ho1 -O22 -C213 78.01(15)

O21 -Ho1 -O22 -C21 175.6(2)

O21 -Ho1 -O22 -C213 10.22(14)

O31 -Ho1 -O22 -C21 -50.2(2)

O31 -Ho1 -O22 -C213 144.49(15)

O32 -Ho1 -O22 -C21 -43.8(2)

O32 -Ho1 -O22 -C213 150.85(14)

O41 -Ho1 -O22 -C21 20.4(2)

O41 -Ho1 -O22 -C213 -144.91(15)

O42 -Ho1 -O22 -C21 45.1(2)

O42 -Ho1 -O22 -C213 -120.26(14)

O51 -Ho1 -O22 -C21 90.8(2)

O51 -Ho1 -O22 -C213 -74.58(15)

O52 -Ho1 -O22 -C21 121.2(2)

O52 -Ho1 -O22 -C213 -44.17(15)

O11 -Ho1 -O31 -N3 -42.27(14)

O12 -Ho1 -O31 -N3 -87.23(13)

Table S7 - Torsion Angles (Degrees) (continued)

for: fa438 P2(1)/c R = 0.02

O21 -Ho1 -O31 -N3 -143.36(12)

O22 -Ho1 -O31 -N3 171.51(14)

O32 -Ho1 -O31 -N3 -1.32(12)

O41 -Ho1 -O31 -N3 80.91(13)

O42 -Ho1 -O31 -N3 46.86(14)

O51 -Ho1 -O31 -N3 127.14(13)

O11 -Ho1 -O32 -N3 145.10(14)

O12 -Ho1 -O32 -N3 77.02(13)

O21 -Ho1 -O32 -N3 78.72(16)

O22 -Ho1 -O32 -N3 -6.09(15)

O31 -Ho1 -O32 -N3 1.33(12)

O41 -Ho1 -O32 -N3 -76.46(13)

O42 -Ho1 -O32 -N3 -130.72(14)

O51 -Ho1 -O32 -N3 -96.52(15)

O52 -Ho1 -O32 -N3 -167.96(12)

O11 -Ho1 -O41 -N4 -29.47(17)

O12 -Ho1 -O41 -N4 -123.73(14)

O21 -Ho1 -O41 -N4 116.82(14)

O22 -Ho1 -O41 -N4 152.33(14)

O31 -Ho1 -O41 -N4 -140.02(15)

O32 -Ho1 -O41 -N4 -84.85(14)

O42 -Ho1 -O41 -N4 -2.92(13)

O51 -Ho1 -O41 -N4 80.91(14)

O52 -Ho1 -O41 -N4 42.39(15)

O11 -Ho1 -O42 -N4 162.10(14)

O12 -Ho1 -O42 -N4 123.74(14)

O21 -Ho1 -O42 -N4 -121.38(14)

O22 -Ho1 -O42 -N4 -29.01(16)

Table S7 - Torsion Angles (Degrees) (continued)

for: fa438 P2(1)/c R = 0.02

O31 -Ho1 -O42 -N4 45.02(15)

O32 -Ho1 -O42 -N4 82.90(14)

O41 -Ho1 -O42 -N4 2.94(13)

O51 -Ho1 -O42 -N4 -73.86(14)

O52 -Ho1 -O42 -N4 -127.94(15)

O11 -Ho1 -O51 -N5 -5.73(16)

O12 -Ho1 -O51 -N5 83.17(17)

O21 -Ho1 -O51 -N5 74.39(14)

O22 -Ho1 -O51 -N5 141.83(15)

O31 -Ho1 -O51 -N5 -175.13(12)

O32 -Ho1 -O51 -N5 -108.43(14)

O41 -Ho1 -O51 -N5 -128.81(15)

O42 -Ho1 -O51 -N5 -74.24(14)

O52 -Ho1 -O51 -N5 -0.53(12)

O11 -Ho1 -O52 -N5 175.60(15)

O12 -Ho1 -O52 -N5 -141.64(13)

O21 -Ho1 -O52 -N5 -88.73(14)

O22 -Ho1 -O52 -N5 -37.41(14)

O32 -Ho1 -O52 -N5 125.44(13)

O41 -Ho1 -O52 -N5 49.21(14)

O42 -Ho1 -O52 -N5 86.48(14)

O51 -Ho1 -O52 -N5 0.53(12)

Ho1 -O11 -C112 -C111 -164.86(16)

Ho1 -O11 -C112 -C113 12.6(3)

Ho1 -O12 -C113 -C112 -12.4(2)

Ho1 -O12 -C113 -C114 166.65(19)

C11 -O12 -C113 -C112 -162.75(19)

C11 -O12 -C113 -C114 16.3(3)

Table S7 - Torsion Angles (Degrees) (continued)

for: fa438 P2(1)/c R = 0.02

Ho1 -O21 -C212 -C211 -168.86(16)

Ho1 -O21 -C212 -C213 10.6(3)

Ho1 -O22 -C213 -C212 -9.2(2)

Ho1 -O22 -C213 -C214 170.33(19)

C21 -O22 -C213 -C212 -176.1(2)

C21 -O22 -C213 -C214 3.5(3)

Ho1 -O31 -N3 -O32 2.3(2)

Ho1 -O31 -N3 -O33 -177.5(2)

Ho1 -O32 -N3 -O31 -2.3(2)

Ho1 -O32 -N3 -O33 177.5(2)

Ho1 -O41 -N4 -O42 5.0(2)

Ho1 -O41 -N4 -O43 -175.1(2)

Ho1 -O42 -N4 -O41 -5.1(2)

Ho1 -O42 -N4 -O43 175.0(2)

Ho1 -O51 -N5 -O52 0.9(2)

Ho1 -O51 -N5 -O53 -179.1(2)

Ho1 -O52 -N5 -O51 -0.9(2)

Ho1 -O52 -N5 -O53 179.1(2)

C13 -N1 -C12 -C111 176.9(2)

C12 -N1 -C13 -C14 -164.1(3)

C12 -N1 -C13 -C15 77.0(3)

C12 -N1 -C13 -C16 -45.9(4)

C23 -N2 -C22 -C211 173.7(2)

C22 -N2 -C23 -C24 -100.0(8)

C22 -N2 -C23 -C25 14.4(3)

C22 -N2 -C23 -C26 133.2(3)

N1 -C12 -C111 -C112 -0.1(4)

N1 -C12 -C111 -C116 -173.2(2)

Table S7 - Torsion Angles (Degrees) (continued)

for: fa438 P2(1)/c R = 0.02

N1 -C13 -C14 -O13 -60.1(3)

C15 -C13 -C14 -O13 57.4(4)

C16 -C13 -C14 -O13 -178.5(3)

N2 -C22 -C211 -C212 0.3(4)

N2 -C22 -C211 -C216 -174.8(2)

N2 -C23 -C24 -O23 63.4(14)

C25 -C23 -C24 -O23 -55.2(15)

C26 -C23 -C24 -O23 -176.5(10)

C12 -C111 -C112 -O11 5.9(3)

C12 -C111 -C112 -C113 -171.7(2)

C116 -C111 -C112 -O11 178.9(2)

C116 -C111 -C112 -C113 1.3(3)

C12 -C111 -C116 -C115 171.6(2)

C112 -C111 -C116 -C115 -1.5(3)

O11 -C112 -C113 -O12 1.6(3)

O11 -C112 -C113 -C114 -177.5(2)

C111 -C112 -C113 -O12 179.20(19)

C111 -C112 -C113 -C114 0.2(3)

O12 -C113 -C114 -C115 179.7(2)

C112 -C113 -C114 -C115 -1.4(4)

C113 -C114 -C115 -C116 1.2(4)

C114 -C115 -C116 -C111 0.3(4)

C22 -C211 -C212 -O21 5.0(3)

C22 -C211 -C212 -C213 -174.5(2)

C216 -C211 -C212 -O21 180.0(2)

C216 -C211 -C212 -C213 0.6(3)

C22 -C211 -C216 -C215 174.4(2)

C212 -C211 -C216 -C215 -0.8(4)

Table S7 - Torsion Angles (Degrees) (continued)

for: fa438 P2(1)/c R = 0.02

O21 -C212 -C213 -O22 0.4(3)

O21 -C212 -C213 -C214 -179.1(2)

C211 -C212 -C213 -O22 179.9(2)

C211 -C212 -C213 -C214 0.3(3)

O22 -C213 -C214 -C215 179.5(2)

C212 -C213 -C214 -C215 -1.0(4)

C213 -C214 -C215 -C216 0.7(4)

C214 -C215 -C216 -C211 0.1(4)

Table S8 - Contact Distances (Angstrom)

for: fa438 P2(1)/c R = 0.02

Ho1 .O33 4.105(2) O21 .O51 2.955(2)

Ho1 .O43 4.122(2) O21 .C22 2.851(3)

Ho1 .O53 4.146(2) O21 .N2 2.632(2)

Ho1 .C113 3.354(2) O21 .O12 2.794(2)

Ho1 .C213 3.396(2) O21 .O52 2.800(2)

Ho1 .H1 3.89(3) O22 .O51 2.870(2)

Ho1 .H2 3.86(3) O22 .O31 2.747(2)

Ho1 .H11B 3.4000 O22 .O21 2.593(2)

Ho1 .H11C 3.9300 O23 .O13_c 2.669(5)

Ho1 .H21A 3.4700 O23 .C25 2.796(6)

O11 .O12 2.607(2) O23 .O42_c 3.069(6)

O11 .O21 3.139(2) O23 .C22 3.362(6)

O11 .O32 2.942(2) O23 .N2 2.914(5)

O11 .O42 3.056(2) O23 .O43_c 3.058(5)

O11 .O52 2.706(2) O24 .O52 2.832(7)

O11 .N1 2.633(3) O24 .C24 1.83(2)

O11 .C12 2.843(3) O24 .N2 2.817(7)

O11 .C11_a 3.303(3) O24 .N1 3.065(7)

O12 .O21 2.794(2) O24 .O23 2.857(9)

O12 .O11 2.607(2) O24 .C16 3.345(9)

O12 .O31 2.837(2) O24 .C12 3.417(8)

O12 .O32 3.019(2) O24 .C26 2.679(8)

O13 .O42 3.160(4) O31 .O22 2.747(2)

O13 .C15 2.829(5) O31 .O12 2.837(2)

O13 .N1 2.752(4) O31 .C21_d 3.342(3)

O13 .O23_b 2.669(5) O31 .O41 2.824(2)

O21 .O11 3.139(2) O31 .O32 2.152(2)

O21 .O22 2.593(2) O32 .O42 2.913(3)

Table S8 - Contact Distances (Angstrom) (continued)

for: fa438 P2(1)/c R = 0.02

O32 .O41 2.906(2) O51 .O22 2.870(2)

O32 .O12 3.019(2) O52 .O11 2.706(2)

O32 .C11_a 3.390(3) O52 .O42 2.761(3)

O32 .O31 2.152(2) O52 .O21 2.800(2)

O32 .O11 2.942(2) O52 .O51 2.153(3)

O33 .Ho1 4.105(2) O52 .O24 2.832(7)

O33 .C21_d 3.318(3) O53 .C15_c 3.224(4)

O33 .C22_a 3.262(3) O53 .C22_b 3.140(3)

O33 .C15_e 3.418(4) O53 .C14_c 3.250(4)

O41 .O32 2.906(2) O53 .Ho1 4.146(2)

O41 .O31 2.824(2) N1 .O24 3.065(7)

O41 .C12_f 3.360(3) N1 .O13 2.752(4)

O41 .O51 2.811(3) N1 .O11 2.633(3)

O41 .O42 2.157(2) N1 .C112 2.871(3)

O42 .O11 3.056(2) N2 .O23 2.914(5)

O42 .O41 2.157(2) N2 .C212 2.859(3)

O42 .O23_b 3.069(6) N2 .O24 2.817(7)

O42 .O32 2.913(3) N2 .O21 2.632(2)

O42 .O52 2.761(3) N3 .O41 3.013(3)

O42 .O13 3.160(4) N3 .O12 3.130(3)

O42 .O51 2.906(3) N4 .O32 3.145(3)

O43 .C12_f 3.401(3) N4 .O51 2.991(3)

O43 .O23_b 3.058(5) N5 .O42 3.019(3)

O43 .Ho1 4.122(2) N5 .O21 3.097(3)

O51 .O41 2.811(3) O11 .H1 1.99(3)

O51 .O52 2.153(3) O12 .H114 2.6600

O51 .O42 2.906(3) O13 .H1 2.43(3)

O51 .O21 2.955(2) O13 .H23_b 2.0100

Table S8 - Contact Distances (Angstrom) (continued)

for: fa438 P2(1)/c R = 0.02

O13 .H15B 2.4200 O53 .H25C_b 2.7600

O13 .H11A_a 2.7900 O53 .H14B_c 2.5500

O21 .H2 1.91(3) O53 .H216_b 2.7200

O22 .H214 2.6700 O53 .H15A_c 2.6300

O23 .H13_c 2.5700 N1 .H13 2.7700

O23 .H25C 2.3800 N1 .H16A 2.7100

O24 .H14A 2.7200 N1 .H15B 2.6700

O24 .H23 2.8600 N1 .H15C 2.5700

O24 .H26B 2.2300 N1 .H14A 2.5800

O24 .H24A 2.2600 N1 .H16B 2.5900

O24 .H16B 2.5000 N2 .H26C 2.6000

O24 .H2 2.59(3) N2 .H24B 2.6300

O31 .H11B 2.6200 N2 .H23 2.8700

O31 .H21A 2.5000 N2 .H26B 2.5600

O32 .H11C_a 2.4500 N2 .H25B 2.6300

O33 .H26C_a 2.7900 N2 .H25C 2.7200

O33 .H25B_a 2.5800 N2 .H27A 2.4700

O33 .H21B_d 2.8500 N2 .H24 2.7800

O41 .H12_f 2.4200 N4 .H114_a 2.9500

O41 .H21A 2.7500 N5 .H14B_c 2.9100

O42 .H114_a 2.6900 N5 .H24 2.8800

O42 .H13 2.4300 C11 .O21 3.225(3)

O43 .H26A_f 2.7600 C11 .O31 3.154(3)

O43 .H12_f 2.7500 C11 .C114 2.833(4)

O52 .H24 2.0500 C11 .O11_e 3.303(3)

O52 .H13 2.5600 C11 .O32_e 3.390(3)

O52 .H14A 2.8000 C12 .O11 2.843(3)

O53 .H22_b 2.2700 C12 .C16 2.947(5)

Table S8 - Contact Distances (Angstrom) (continued)

for: fa438 P2(1)/c R = 0.02

C12 .O24 3.417(8) C26 .C22 3.524(5)

C12 .C15 3.146(4) C27 .C22 3.36(3)

C12 .O41_g 3.360(3) C111 .C114 2.790(3)

C12 .O43_g 3.401(3) C112 .C115 2.813(3)

C14 .O53_b 3.250(4) C112 .N1 2.871(3)

C15 .O13 2.829(5) C112 .O12 2.331(3)

C15 .O53_b 3.224(4) C113 .C116 2.777(3)

C15 .O33_a 3.418(4) C113 .O11 2.354(3)

C15 .C12 3.146(4) C113 .O21 3.333(3)

C16 .C12 2.947(5) C114 .C215_a 3.350(3)

C16 .O24 3.345(9) C114 .C11 2.833(4)

C21 .C214 2.821(4) C114 .C111 2.790(3)

C21 .O31 2.986(3) C115 .C112 2.813(3)

C21 .O31_d 3.342(3) C115 .C214_a 3.425(3)

C21 .O33_d 3.318(3) C115 .C115_h 3.557(3)

C21 .O41 3.393(3) C115 .C215_a 3.453(3)

C22 .O53_c 3.140(3) C116 .C214_a 3.568(3)

C22 .C26 3.524(5) C116 .C113 2.777(3)

C22 .C25 2.859(4) C211 .C214 2.786(3)

C22 .O21 2.851(3) C212 .C215 2.814(3)

C22 .C24 3.363(19) C212 .N2 2.859(3)

C22 .O33_e 3.262(3) C212 .O22 2.326(3)

C22 .O23 3.362(6) C212 .O51 3.273(3)

C22 .C27 3.36(3) C213 .C216 2.778(3)

C24 .C22 3.363(19) C213 .O21 2.354(3)

C25 .O23 2.796(6) C213 .O51 3.275(3)

C25 .C22 2.859(4) C214 .C115_e 3.425(3)

C26 .O24 2.679(8) C214 .C21 2.821(4)

Table S8 - Contact Distances (Angstrom) (continued)

for: fa438 P2(1)/c R = 0.02

C214 .C116_e 3.568(3) C16 .H14A 2.6500

C214 .C211 2.786(3) C16 .H1 3.09(3)

C215 .C115_e 3.453(3) C21 .H21A_d 3.0900

C215 .C212 2.814(3) C21 .H15C_f 2.9500

C215 .C114_e 3.350(3) C21 .H214 2.5200

C216 .C213 2.778(3) C22 .H25B 2.7800

C11 .H114 2.5500 C22 .H216 2.6100

C12 .H26B 3.0800 C22 .H25C 2.8000

C12 .H116 2.6100 C23 .H24 2.8100

C12 .H16B 3.0100 C23 .H22 2.6600

C12 .H16A 2.7900 C23 .H23 2.7900

C12 .H15C 2.8700 C24 .H26B 2.8500

C13 .H12 2.6400 C24 .H26A 2.8100

C13 .H13 2.8000 C24 .H25A 2.6800

C14 .H15B 2.6000 C24 .H25C 2.5200

C14 .H1 2.40(2) C24 .H2 2.81(3)

C14 .H16B 2.6900 C25 .H24A 2.6500

C14 .H16C 2.6200 C25 .H22 2.5000

C14 .H23_b 2.9700 C25 .H27B 2.7400

C14 .H15A 2.7600 C25 .H27A 2.8500

C15 .H16C 2.7500 C25 .H26A 2.6700

C15 .H14B 2.7100 C25 .H26C 2.6400

C15 .H1 2.89(3) C26 .H2 2.58(3)

C15 .H16A 2.6400 C26 .H24A 2.7900

C16 .H15C 2.7600 C26 .H27B 2.6100

C16 .H15A 2.6400 C26 .H25B 2.6800

C16 .H12 2.7400 C26 .H24B 2.8400

C16 .H14B 2.6700 C26 .H25A 2.6200

Table S8 - Contact Distances (Angstrom) (continued)

for: fa438 P2(1)/c R = 0.02

C27 .H26A 2.5800 H1 .C14 2.40(2)

C27 .H26B 2.4500 H1 .C15 2.89(3)

C27 .H25C 2.8000 H1 .C16 3.09(3)

C27 .H2 2.57(4) H1 .C111 2.49(3)

C27 .H25A 2.8500 H1 .C112 2.54(2)

C27 .H23 2.0500 H1 .H13 2.2400

C111 .H26B 2.8200 H1 .H14A 2.4900

C111 .H1 2.49(3) H2 .Ho1 3.86(3)

C112 .H1 2.54(2) H2 .O21 1.91(3)

C113 .H11C 2.5800 H2 .O24 2.59(3)

C113 .H11A 2.6700 H2 .C24 2.81(3)

C114 .H11A 2.7500 H2 .C26 2.58(3)

C114 .H11C 2.7800 H2 .C211 2.45(3)

C115 .H115_h 3.0600 H2 .C212 2.46(3)

C116 .H115_h 3.0300 H2 .C27 2.57(4)

C116 .H26B 3.0800 H2 .H26B 2.4200

C116 .H12 2.5900 H2 .H24 2.4100

C211 .H2 2.45(3) H11A .C113 2.6700

C212 .H2 2.46(3) H11A .C114 2.7500

C213 .H21C 2.6500 H11A .H114 2.2400

C213 .H21B 2.6000 H11A .O13_e 2.7900

C214 .H21C 2.7800 H11B .Ho1 3.4000

C214 .H21B 2.7200 H11B .O31 2.6200

C216 .H22 2.5900 H11C .Ho1 3.9300

C216 .H14A_c 3.0900 H11C .C113 2.5800

H1 .Ho1 3.89(3) H11C .C114 2.7800

H1 .O11 1.99(3) H11C .H114 2.4400

H1 .O13 2.43(3) H11C .O32_e 2.4500

Table S8 - Contact Distances (Angstrom) (continued)

for: fa438 P2(1)/c R = 0.02

H12 .C13 2.6400 H14B .H16C 2.4500

H12 .C16 2.7400 H14B .O53_b 2.5500

H12 .C116 2.5900 H14B .N5_b 2.9100

H12 .H16A 2.2800 H15A .C14 2.7600

H12 .H116 2.4000 H15A .C16 2.6400

H12 .O41_g 2.4200 H15A .H16C 2.5300

H12 .O43_g 2.7500 H15A .O53_b 2.6300

H13 .O42 2.4300 H15B .O13 2.4200

H13 .O52 2.5600 H15B .N1 2.6700

H13 .N1 2.7700 H15B .C14 2.6000

H13 .C13 2.8000 H15C .N1 2.5700

H13 .H1 2.2400 H15C .C12 2.8700

H13 .H14A 2.0500 H15C .C16 2.7600

H13 .H14B 2.5900 H15C .H16A 2.5400

H13 .O23_b 2.5700 H15C .C21_g 2.9500

H13 .H23_b 2.1200 H15C .H21B_g 2.3500

H14A .O52 2.8000 H16A .N1 2.7100

H14A .N1 2.5800 H16A .C12 2.7900

H14A .O24 2.7200 H16A .C15 2.6400

H14A .C16 2.6500 H16A .H12 2.2800

H14A .H1 2.4900 H16A .H15C 2.5400

H14A .H13 2.0500 H16B .N1 2.5900

H14A .H16B 2.5000 H16B .O24 2.5000

H14A .H24 2.5300 H16B .C12 3.0100

H14A .C216_b 3.0900 H16B .C14 2.6900

H14B .C15 2.7100 H16B .H14A 2.5000

H14B .C16 2.6700 H16C .C14 2.6200

H14B .H13 2.5900 H16C .C15 2.7500

Table S8 - Contact Distances (Angstrom) (continued)

for: fa438 P2(1)/c R = 0.02

H16C .H14B 2.4500 H23 .H13_c 2.1200

H16C .H15A 2.5300 H24 .N5 2.8800

H21A .Ho1 3.4700 H24 .C23 2.8100

H21A .O31 2.5000 H24 .C24 2.2100

H21A .O41 2.7500 H24 .H2 2.4100

H21A .C21_d 3.0900 H24 .H14A 2.5300

H21A .H21A_d 2.5200 H24 .O52 2.0500

H21B .C213 2.6000 H24 .N2 2.7800

H21B .C214 2.7200 H24 .H27A 2.0700

H21B .H214 2.2800 H24 .H24B 1.2900

H21B .O33_d 2.8500 H24A .C26 2.7900

H21B .H15C_f 2.3500 H24A .C25 2.6500

H21C .C213 2.6500 H24A .H23 2.5300

H21C .C214 2.7800 H24A .H25A 2.5300

H21C .H214 2.3300 H24B .N2 2.6300

H22 .C23 2.6600 H24B .C26 2.8400

H22 .C25 2.5000 H24B .H23 1.9700

H22 .C216 2.5900 H25A .H26A 2.4500

H22 .H25B 2.3200 H25A .C24 2.6800

H22 .H25C 2.2600 H25A .C26 2.6200

H22 .H216 2.4000 H25A .C27 2.8500

H22 .O53_c 2.2700 H25A .H24A 2.5300

H23 .N2 2.8700 H25B .C26 2.6800

H23 .C23 2.7900 H25B .H22 2.3200

H23 .H24A 2.5300 H25B .H26C 2.4800

H23 .H24B 1.9700 H25B .O33_e 2.5800

H23 .O13_c 2.0100 H25B .N2 2.6300

H23 .C14_c 2.9700 H25B .C22 2.7800

Table S8 - Contact Distances (Angstrom) (continued)

for: fa438 P2(1)/c R = 0.02

H25C .O23 2.3800 H27A .H24 2.0700

H25C .C24 2.5200 H27A .H24A 1.6100

H25C .N2 2.7200 H27A .H24B 1.0300

H25C .C22 2.8000 H27B .O23 2.0200

H25C .H22 2.2600 H27B .H26A 2.4700

H25C .O53_c 2.7600 H27B .H23 2.5900

H25C .C27 2.8000 H27B .C25 2.7400

H26A .C24 2.8100 H27B .C26 2.6100

H26A .C27 2.5800 H27B .H24A 0.3100

H26A .H25A 2.4500 H27B .H24B 1.4000

H26A .C25 2.6700 H114 .C11 2.5500

H26A .O43_g 2.7600 H114 .O12 2.6600

H26A .H27B 2.4700 H114 .H115 2.3500

H26B .O24 2.2300 H114 .H11A 2.2400

H26B .C12 3.0800 H114 .H11C 2.4400

H26B .C111 2.8200 H114 .O42_e 2.6900

H26B .C116 3.0800 H114 .N4_e 2.9500

H26B .C24 2.8500 H115 .H116 2.3100

H26B .N2 2.5600 H115 .H114 2.3500

H26B .C27 2.4500 H115 .C116_h 3.0300

H26B .H2 2.4200 H115 .C115_h 3.0600

H26C .N2 2.6000 H116 .C12 2.6100

H26C .C25 2.6400 H116 .H115 2.3100

H26C .H25B 2.4800 H116 .H12 2.4000

H26C .O33_e 2.7900 H214 .H21C 2.3300

H27A .H23 1.0700 H214 .H21B 2.2800

H27A .N2 2.4700 H214 .O22 2.6700

H27A .C25 2.8500 H214 .C21 2.5200

Table S8 - Contact Distances (Angstrom) (continued)

for: fa438 P2(1)/c R = 0.02

H214 .H215 2.3500 H216 .H22 2.4000

H215 .H214 2.3500 H216 .H215 2.3000

H215 .H216 2.3000 H216 .O53_c 2.7200

H216 .C22 2.6100

Table S9 - Hydrogen Bonds (Angstrom, Deg)

for: fa438 P2(1)/c R = 0.02

N1 -- H1 .. O11 0.80(3) 1.99(3) 2.633(3) 137(2) .

N1 -- H1 .. O13 0.80(3) 2.43(3) 2.752(4) 106(2) .

N2 -- H2 .. O21 0.86(3) 1.91(3) 2.632(2) 141(2) .

O13 -- H13 .. O42 0.8400 2.4300 3.160(4) 146.00 .

O13 -- H13 .. O52 0.8400 2.5600 3.298(4) 147.00 .

O23 -- H23 .. O13 0.8400 2.0100 2.669(5) 135.00 2_555

C11 -- H11C .. O32 0.9800 2.4500 3.390(3) 160.00 2_655

C12 -- H12 .. O41 0.9500 2.4200 3.360(3) 168.00 4_554

C14 -- H14B .. O53 0.9900 2.5500 3.250(4) 127.00 2_545

C15 -- H15B .. O13 0.9800 2.4200 2.829(5) 104.00 .

C16 -- H16B .. O24 0.9800 2.5000 3.345(9) 144.00 .

C21 -- H21A .. O31 0.9800 2.5000 2.986(3) 111.00 .

C22 -- H22 .. O53 0.9500 2.2700 3.140(3) 152.00 2_555

C25 -- H25B .. O33 0.9800 2.5800 3.457(4) 149.00 2_655

C25 -- H25C .. O23 0.9800 2.3800 2.796(6) 105.00 .

C26 -- H26B .. O24 0.9800 2.2300 2.679(8) 106.00 .

**fa440 P2(1)/c R = 0.05 : day, 5 April 2016**

C o n t e n t s

===============

Table S1 - Crystal Data and Details of the Structure Determination

for: fa440 P2(1)/c R = 0.05

Table S2 - Final Coordinates and Equivalent Isotropic Displacement

Parameters of the non-Hydrogen atoms

for: fa440 P2(1)/c R = 0.05

Table S3 - Hydrogen Atom Positions and Isotropic Displacement

Parameters

for: fa440 P2(1)/c R = 0.05

Table S4 - (An)isotropic Displacement Parameters

for: fa440 P2(1)/c R = 0.05

Table S5 - Bond Distances (Angstrom)

for: fa440 P2(1)/c R = 0.05

Table S6 - Bond Angles (Degrees)

for: fa440 P2(1)/c R = 0.05

Table S7 - Torsion Angles (Degrees)

for: fa440 P2(1)/c R = 0.05

Table S8 - Contact Distances (Angstrom)

for: fa440 P2(1)/c R = 0.05

Table S9 - Hydrogen Bonds (Angstrom, Deg)

for: fa440 P2(1)/c R = 0.05

Table S1 - Crystal Data and Details of the Structure Determination

for: fa440 P2(1)/c R = 0.05

Crystal Data

Formula C36 H38 Ce2 N4 O21, 2(C H4 O)

Formula Weight 1207.03

Crystal System monoclinic

Space group P21/c (No. 14)

a, b, c [Angstrom] 12.3609(6) 33.9840(15) 11.0875(5)

alpha, beta, gamma [deg] 90 99.052(2) 90

V [Ang**3] 4599.6(4)

Z 4

D(calc) [g/cm**3] 1.743

Mu(MoKa) [ /mm ] 2.043

F(000) 2408

Crystal Size [mm] 0.32 x 0.34 x 0.44

Data Collection

Temperature (K) 200

Radiation [Angstrom] MoKa 0.71073

Theta Min-Max [Deg] 1.8, 28.4

Dataset -16: 16 ; -41: 45 ; -14: 14

Tot., Uniq. Data, R(int) 66489, 11484, 0.025

Observed Data [I > 2.0 sigma(I)] 10507

Refinement

Nref, Npar 11484, 617

R, wR2, S 0.0489, 0.0989, 1.29

w = ^2^(FO^2^)+24.0336P] WHERE P=(FO^2^+2FC^2^)/3'

Max. and Av. Shift/Error 0.00, 0.00

Min. and Max. Resd. Dens. [e/Ang^3] -1.97, 1.84

Table S2 - Final Coordinates and Equivalent Isotropic Displacement

Parameters of the non-Hydrogen atoms

for: fa440 P2(1)/c R = 0.05

Atom x y z U(eq) [Ang^2]

---- --- --- --- -----------

Ce1 0.40098(2) 0.36147(2) 0.56414(2) 0.0257(1)

Ce2 0.18468(2) 0.42285(2) 0.68990(2) 0.0258(1)

*O5 0.7217(10) 0.2686(4) 0.5482(12) 0.158(5)

*O6 0.853(3) 0.3510(12) 0.2452(17) 0.158(5)

O11 0.2871(3) 0.43797(13) 0.9107(3) 0.0456(14)

O12 0.3824(3) 0.40287(10) 0.7470(3) 0.0312(10)

O13 0.5830(3) 0.37600(13) 0.6813(4) 0.0445(14)

O21 0.4835(3) 0.42509(12) 0.4734(4) 0.0411(12)

O22 0.2836(3) 0.42031(10) 0.5185(3) 0.0304(10)

O23 0.0841(3) 0.46029(12) 0.5083(4) 0.0452(12)

O31 0.2821(3) 0.29695(11) 0.5001(4) 0.0401(11)

O32 0.2217(3) 0.35430(10) 0.6299(3) 0.0297(10)

O33 0.1291(3) 0.37327(12) 0.8400(3) 0.0403(12)

O41 0.2856(3) 0.36317(12) 0.3287(3) 0.0374(11)

O42 0.4876(3) 0.34229(11) 0.3953(3) 0.0352(11)

O71 -0.0139(3) 0.43465(12) 0.7345(4) 0.0476(14)

O72 0.0015(3) 0.38922(12) 0.6016(4) 0.0470(14)

O73 -0.1560(4) 0.40031(18) 0.6603(8) 0.102(3)

O81 0.4261(3) 0.31455(12) 0.7517(3) 0.0426(12)

O82 0.5206(4) 0.29708(12) 0.6136(4) 0.0461(14)

O83 0.5409(5) 0.26657(17) 0.7875(5) 0.080(2)

O91 0.1358(3) 0.49414(12) 0.7556(4) 0.0463(14)

O92 0.2878(3) 0.49068(12) 0.6836(4) 0.0423(12)

O93 0.2162(4) 0.54768(12) 0.7114(5) 0.0560(16)

Table S2 - Final Coordinates and Equivalent Isotropic Displacement

Parameters of the non-Hydrogen atoms (continued)

for: fa440 P2(1)/c R = 0.05

Atom x y z U(eq) [Ang^2]

---- --- --- --- -----------

N4 0.6714(4) 0.31810(17) 0.3411(5) 0.0522(18)

N7 -0.0589(4) 0.40804(15) 0.6653(6) 0.0527(18)

N8 0.4975(4) 0.29203(14) 0.7193(5) 0.0445(17)

N9 0.2131(4) 0.51183(14) 0.7144(4) 0.0372(14)

O7 0.0701(10) 0.5807(3) 0.8611(11) 0.166(6)

C11 0.4002(5) 0.43275(17) 0.9394(5) 0.0383(17)

C12 0.4470(4) 0.41292(15) 0.8466(4) 0.0298(14)

C13 0.5610(4) 0.40606(17) 0.8687(5) 0.0376(17)

C14 0.6232(5) 0.4187(2) 0.9822(6) 0.056(2)

C15 0.5744(6) 0.4367(2) 1.0665(6) 0.067(3)

C16 0.4623(6) 0.4441(2) 1.0457(6) 0.059(3)

C17 0.2340(6) 0.4549(2) 1.0026(6) 0.063(3)

C18 0.6190(5) 0.38884(19) 0.7811(6) 0.0441(19)

C21 0.4104(4) 0.45305(15) 0.4156(4) 0.0312(16)

C22 0.3041(4) 0.44883(14) 0.4452(4) 0.0282(14)

C23 0.2235(4) 0.47574(16) 0.3913(5) 0.0352(17)

C24 0.2502(5) 0.50444(16) 0.3084(5) 0.0438(19)

C25 0.3538(6) 0.50728(17) 0.2841(5) 0.0468(19)

C26 0.4353(5) 0.48215(16) 0.3389(5) 0.0401(17)

C27 0.5912(5) 0.4272(2) 0.4462(6) 0.050(2)

C28 0.1147(5) 0.47699(18) 0.4224(5) 0.0444(17)

C31 0.2050(4) 0.28795(15) 0.5733(5) 0.0358(17)

C32 0.1788(4) 0.31983(15) 0.6455(4) 0.0298(14)

C33 0.1094(4) 0.31219(16) 0.7324(5) 0.0359(16)

C34 0.0607(5) 0.27453(19) 0.7361(6) 0.050(2)

Table S2 - Final Coordinates and Equivalent Isotropic Displacement

Parameters of the non-Hydrogen atoms (continued)

for: fa440 P2(1)/c R = 0.05

Atom x y z U(eq) [Ang^2]

---- --- --- --- -----------

C35 0.0817(5) 0.24555(19) 0.6594(7) 0.0534(19)

C36 0.1562(5) 0.25178(17) 0.5784(6) 0.0457(17)

C37 0.3188(6) 0.26564(18) 0.4286(6) 0.052(2)

C38 0.0934(5) 0.33979(18) 0.8258(5) 0.0424(19)

C41 0.3403(4) 0.35224(15) 0.2353(4) 0.0326(14)

C42 0.4502(4) 0.34156(14) 0.2780(4) 0.0314(14)

C43 0.5147(5) 0.32927(16) 0.1906(5) 0.0367(16)

C44 0.4683(6) 0.32814(19) 0.0654(5) 0.047(2)

C45 0.3634(6) 0.33916(18) 0.0277(5) 0.0487(19)

C46 0.2977(5) 0.35119(17) 0.1131(5) 0.0440(19)

C47 0.1686(5) 0.3688(2) 0.2990(6) 0.053(2)

C48 0.6248(5) 0.3176(2) 0.2301(6) 0.0505(19)

*C51 0.7854(6) 0.3080(3) 0.3934(7) 0.097(3)

C52 0.8203(10) 0.2719(5) 0.3291(13) 0.188(8)

*C53 0.8582(10) 0.3431(5) 0.3714(12) 0.152(5)

*C54 0.7888(8) 0.3025(4) 0.5301(9) 0.121(4)

*C61 0.7854(6) 0.3080(3) 0.3934(7) 0.097(3)

*C63 0.8582(10) 0.3431(5) 0.3714(12) 0.152(5)

*C64 0.7888(8) 0.3025(4) 0.5301(9) 0.121(4)

C7 0.0540(11) 0.5565(4) 0.9577(13) 0.148(7)

O8 0.0535(9) 0.6604(3) 0.9362(10) 0.151(5)

C8 0.1545(12) 0.6712(6) 1.0114(17) 0.214(10)

U(eq) = 1/3 of the trace of the orthogonalized U Tensor

Starred Atom sites have a S.O.F less than 1.0

Table S3 - Hydrogen Atom Positions and Isotropic Displacement

Parameters

for: fa440 P2(1)/c R = 0.05

Atom x y z U(iso) [Ang^2]

---- --- --- --- -----------

H4 0.62970 0.32560 0.39430 0.0630

*H5 0.65740 0.27240 0.51250 0.2360

*H6 0.89490 0.36990 0.23590 0.2360

H14 0.70000 0.41420 0.99770 0.0670

H15 0.61690 0.44460 1.14160 0.0800

H16 0.42900 0.45710 1.10630 0.0710

H17A 0.25070 0.43940 1.07780 0.0950

H17B 0.15460 0.45510 0.97520 0.0950

H17C 0.25990 0.48200 1.01830 0.0950

H18 0.69620 0.38720 0.80400 0.0530

H24 0.19510 0.52180 0.26970 0.0530

H25 0.37090 0.52680 0.22860 0.0560

H26 0.50830 0.48510 0.32330 0.0480

H27A 0.61870 0.45420 0.45890 0.0750

H27B 0.59110 0.41960 0.36090 0.0750

H27C 0.63870 0.40930 1/2 0.0750

H28 0.06180 0.49230 0.37120 0.0530

H34 0.01270 0.26960 0.79330 0.0600

H35 0.04580 0.22090 0.66060 0.0640

H36 0.17300 0.23100 0.52700 0.0550

H37A 0.25680 0.25580 0.37030 0.0770

H37B 0.34910 0.24420 0.48280 0.0770

H37C 0.37550 0.27570 0.38400 0.0770

H38 0.04960 0.33100 0.88360 0.0510

H44 0.51170 0.31950 0.00690 0.0570

Table S3 - Hydrogen Atom Positions and Isotropic Displacement

Parameters (continued)

for: fa440 P2(1)/c R = 0.05

Atom x y z U(iso) [Ang^2]

---- --- --- --- -----------

H45 0.33420 0.33880 -0.05680 0.0580

H46 0.22370 0.35860 0.08650 0.0530

H47A 0.15320 0.39000 0.23880 0.0800

H47B 0.13900 0.37580 0.37310 0.0800

H47C 0.13430 0.34440 0.26490 0.0800

H48 0.66630 0.30880 0.17010 0.0610

H52A 0.77000 0.25010 0.33760 0.2820

H52B 0.89480 0.26440 0.36580 0.2820

H52C 0.81870 0.27780 0.24230 0.2820

*H53A 0.93460 0.33720 0.40520 0.2280

*H53B 0.85210 0.34800 0.28350 0.2280

*H53C 0.83430 0.36650 0.41150 0.2280

*H54A 0.86520 0.29810 0.57040 0.1450

*H54B 0.76030 0.32630 0.56590 0.1450

*H63A 0.83410 0.36670 0.41220 0.1820

*H63B 0.93490 0.33740 0.40800 0.1820

*H64A 0.86350 0.29570 0.56800 0.1820

*H64B 0.76640 0.32700 0.56580 0.1820

*H64C 0.73880 0.28120 0.54450 0.1820

H7 0.02980 0.60070 0.85990 0.2490

H7A -0.00720 0.53860 0.93120 0.2230

H7B 0.03730 0.57270 1.02570 0.2230

H7C 0.12060 0.54120 0.98460 0.2230

H8 0.03280 0.63840 0.95850 0.2260

Table S3 - Hydrogen Atom Positions and Isotropic Displacement

Parameters (continued)

for: fa440 P2(1)/c R = 0.05

Atom x y z U(iso) [Ang^2]

---- --- --- --- -----------

H8A 0.21620 0.66070 0.97570 0.3190

H8B 0.15620 0.66030 1.09360 0.3190

H8C 0.16010 0.69990 1.01620 0.3190

=======================================================

The Temperature Factor has the Form of Exp(-T) Where

T = 8*(Pi**2)*U*(Sin(Theta)/Lambda)**2 for Isotropic Atoms

Table S4 - (An)isotropic Displacement Parameters

for: fa440 P2(1)/c R = 0.05

Atom U(1,1) or U U(2,2) U(3,3) U(2,3) U(1,3) U(1,2)

---- ------ ------ ------ ------ ------ ------

Ce1 0.0249(1) 0.0287(1) 0.0252(1) -0.0030(1) 0.0093(1) 0.0007(1)

Ce2 0.0218(1) 0.0295(1) 0.0270(1) -0.0024(1) 0.0063(1) 0.0008(1)

O5 0.100(7) 0.239(11) 0.132(7) 0.005(7) 0.012(6) 0.060(7)

O6 0.100(7) 0.239(11) 0.132(7) 0.005(7) 0.012(6) 0.060(7)

O11 0.046(2) 0.060(3) 0.032(2)-0.0157(18) 0.0101(17) 0.000(2)

O12 0.0248(16) 0.040(2) 0.0278(17)-0.0079(14) 0.0007(13) 0.0013(14)

O13 0.0281(19) 0.055(3) 0.050(2) -0.001(2) 0.0048(17)-0.0005(17)

O21 0.037(2) 0.047(2) 0.043(2) 0.0024(18) 0.0180(17)-0.0018(17)

O22 0.0346(18) 0.0292(17) 0.0295(17) 0.0024(14) 0.0116(14) 0.0020(14)

O23 0.039(2) 0.050(2) 0.047(2) 0.0097(19) 0.0080(18) 0.0084(18)

O31 0.048(2) 0.0296(19) 0.045(2)-0.0085(16) 0.0149(18)-0.0040(16)

O32 0.0271(16) 0.0256(17) 0.0385(19)-0.0004(14) 0.0119(14)-0.0022(13)

O33 0.041(2) 0.044(2) 0.038(2) 0.0068(17) 0.0129(17) 0.0029(17)

O41 0.0314(18) 0.049(2) 0.0312(18)-0.0073(16) 0.0035(14) 0.0034(16)

O42 0.0316(18) 0.051(2) 0.0238(17)-0.0079(15) 0.0065(14) 0.0016(16)

O71 0.032(2) 0.044(2) 0.069(3) -0.003(2) 0.0147(19) 0.0037(17)

O72 0.033(2) 0.045(2) 0.060(3) -0.007(2)-0.0020(18)-0.0008(17)

O73 0.029(3) 0.081(4) 0.199(8) -0.030(4) 0.028(4) -0.014(3)

O81 0.046(2) 0.048(2) 0.036(2) 0.0035(17) 0.0131(17) 0.0085(18)

O82 0.054(3) 0.046(2) 0.041(2) 0.0026(18) 0.0163(19) 0.0156(19)

O83 0.092(4) 0.073(4) 0.074(4) 0.034(3) 0.014(3) 0.036(3)

O91 0.038(2) 0.040(2) 0.064(3) -0.008(2) 0.0180(19)-0.0022(17)

O92 0.034(2) 0.044(2) 0.051(2)-0.0089(18) 0.0137(17)-0.0044(17)

O93 0.056(3) 0.031(2) 0.080(3) -0.005(2) 0.008(2)-0.0077(19)

Table S4 - (An)isotropic Displacement Parameters (continued)

for: fa440 P2(1)/c R = 0.05

Atom U(1,1) or U U(2,2) U(3,3) U(2,3) U(1,3) U(1,2)

---- ------ ------ ------ ------ ------ ------

N4 0.032(2) 0.077(4) 0.049(3) -0.025(3) 0.011(2) 0.002(2)

N7 0.028(2) 0.039(3) 0.091(4) 0.004(3) 0.009(3) 0.003(2)

N8 0.052(3) 0.037(3) 0.043(3) 0.007(2) 0.003(2) 0.006(2)

N9 0.028(2) 0.037(2) 0.045(3) -0.008(2) 0.0004(19)-0.0037(18)

O7 0.165(10) 0.142(9) 0.209(11) 0.006(7) 0.084(8) 0.049(7)

C11 0.038(3) 0.043(3) 0.034(3) -0.009(2) 0.006(2) -0.001(2)

C12 0.029(2) 0.032(3) 0.027(2) 0.0014(19) 0.0005(18)-0.0048(19)

C13 0.031(3) 0.044(3) 0.036(3) 0.006(2) 0.000(2) -0.007(2)

C14 0.039(3) 0.082(5) 0.042(3) -0.001(3) -0.009(3) -0.016(3)

C15 0.067(5) 0.092(6) 0.037(3) -0.018(4) -0.007(3) -0.020(4)

C16 0.067(5) 0.074(5) 0.036(3) -0.018(3) 0.008(3) -0.008(4)

C17 0.065(4) 0.091(6) 0.036(3) -0.021(3) 0.017(3) 0.014(4)

C18 0.029(3) 0.056(4) 0.046(3) 0.010(3) 0.002(2) 0.002(2)

C21 0.036(3) 0.031(3) 0.028(2)-0.0035(19) 0.009(2) 0.000(2)

C22 0.036(3) 0.026(2) 0.024(2)-0.0009(18) 0.0093(19)-0.0007(19)

C23 0.041(3) 0.035(3) 0.030(3) -0.005(2) 0.007(2) 0.005(2)

C24 0.066(4) 0.031(3) 0.034(3) 0.001(2) 0.007(3) 0.013(3)

C25 0.077(4) 0.032(3) 0.035(3) 0.002(2) 0.020(3) -0.005(3)

C26 0.051(3) 0.038(3) 0.036(3) -0.007(2) 0.021(2) -0.012(2)

C27 0.033(3) 0.064(4) 0.057(4) -0.003(3) 0.021(3) -0.004(3)

C28 0.045(3) 0.050(3) 0.038(3) 0.004(3) 0.006(2) 0.008(3)

C31 0.034(3) 0.031(3) 0.041(3) 0.001(2) 0.002(2) -0.003(2)

C32 0.023(2) 0.032(3) 0.033(2) 0.007(2) 0.0002(18)-0.0017(18)

C33 0.026(2) 0.036(3) 0.046(3) 0.013(2) 0.007(2) 0.001(2)

C34 0.038(3) 0.048(4) 0.065(4) 0.022(3) 0.009(3) -0.006(3)

Table S4 - (An)isotropic Displacement Parameters (continued)

for: fa440 P2(1)/c R = 0.05

Atom U(1,1) or U U(2,2) U(3,3) U(2,3) U(1,3) U(1,2)

---- ------ ------ ------ ------ ------ ------

C35 0.046(3) 0.041(3) 0.071(4) 0.012(3) 0.002(3) -0.015(3)

C36 0.048(3) 0.035(3) 0.051(3) -0.002(3) -0.002(3) -0.010(2)

C37 0.066(4) 0.036(3) 0.056(4) -0.017(3) 0.019(3) -0.004(3)

C38 0.034(3) 0.050(4) 0.046(3) 0.012(3) 0.015(2) 0.002(2)

C41 0.043(3) 0.027(2) 0.027(2)-0.0008(19) 0.003(2) 0.000(2)

C42 0.041(3) 0.028(2) 0.026(2)-0.0028(19) 0.008(2) -0.007(2)

C43 0.046(3) 0.039(3) 0.028(2) -0.005(2) 0.015(2) -0.006(2)

C44 0.067(4) 0.050(4) 0.027(3) -0.006(2) 0.014(3) -0.006(3)

C45 0.072(4) 0.047(3) 0.024(3) -0.005(2) -0.002(3) -0.004(3)

C46 0.058(4) 0.037(3) 0.035(3) -0.001(2) 0.001(3) 0.000(3)

C47 0.031(3) 0.067(4) 0.057(4) -0.016(3) -0.005(3) 0.005(3)

C48 0.048(3) 0.067(4) 0.041(3) -0.022(3) 0.021(3) -0.004(3)

C51 0.032(3) 0.174(8) 0.080(4) -0.057(5) -0.002(3) 0.024(4)

C52 0.103(9) 0.29(2) 0.159(12) -0.114(13) -0.017(8) 0.127(11)

C53 0.082(7) 0.255(11) 0.108(7) -0.031(7) -0.015(5) -0.046(8)

C54 0.059(5) 0.217(11) 0.083(5) -0.029(6) -0.004(4) 0.062(6)

C61 0.032(3) 0.174(8) 0.080(4) -0.057(5) -0.002(3) 0.024(4)

C63 0.082(7) 0.255(11) 0.108(7) -0.031(7) -0.015(5) -0.046(8)

C64 0.059(5) 0.217(11) 0.083(5) -0.029(6) -0.004(4) 0.062(6)

C7 0.131(11) 0.144(12) 0.194(14) 0.003(9) 0.099(10) 0.001(9)

O8 0.153(8) 0.149(9) 0.163(9) 0.057(7) 0.062(7) 0.055(7)

C8 0.137(11) 0.27(2) 0.238(18) 0.001(16) 0.042(11) 0.051(12)

=======================================================

The Temperature Factor has the Form of Exp(-T) Where

T = 8*(Pi**2)*U*(Sin(Theta)/Lambda)**2 for Isotropic Atoms

T = 2*(Pi**2)*Sumij(h(i)*h(j)*U(i,j)*Astar(i)*Astar(j)), for

Anisotropic Atoms. Astar(i) are Reciprocal Axial Lengths and

h(i) are the Reflection Indices.

Table S5 - Bond Distances (Angstrom)

for: fa440 P2(1)/c R = 0.05

Ce1 -O12 2.508(3) O22 -C22 1.315(6)

Ce1 -O13 2.465(4) O23 -C28 1.219(7)

Ce1 -O21 2.655(4) O31 -C31 1.380(7)

Ce1 -O22 2.476(4) O31 -C37 1.442(8)

Ce1 -O31 2.673(4) O32 -C32 1.309(6)

Ce1 -O32 2.452(4) O33 -C38 1.222(7)

Ce1 -O41 2.771(3) O41 -C47 1.445(7)

Ce1 -O42 2.389(3) O41 -C41 1.374(6)

Ce1 -O81 2.600(4) O42 -C42 1.310(6)

Ce1 -O82 2.650(4) O71 -N7 1.258(7)

Ce2 -O11 2.624(3) O72 -N7 1.277(7)

Ce2 -O12 2.520(4) O73 -N7 1.221(7)

Ce2 -O22 2.418(3) O81 -N8 1.262(6)

Ce2 -O23 2.536(4) O82 -N8 1.261(7)

Ce2 -O32 2.485(3) O83 -N8 1.217(8)

Ce2 -O33 2.538(4) O91 -N9 1.273(6)

Ce2 -O71 2.610(4) O92 -N9 1.259(6)

Ce2 -O72 2.587(4) O93 -N9 1.220(6)

Ce2 -O91 2.628(4) N4 -C51 1.477(9)

Ce2 -O92 2.640(4) N4 -C61 1.477(9)

O5 -C54 1.452(18) N4 -C48 1.274(9)

O6 -C63 1.42(2) O5 -H5 0.8400

O11 -C11 1.395(7) O6 -H6 0.8400

O11 -C17 1.418(8) N4 -H4 0.8800

O12 -C12 1.302(6) O7 -C7 1.389(18)

O13 -C18 1.207(8) C11 -C16 1.357(9)

O21 -C21 1.396(6) C11 -C12 1.427(7)

O21 -C27 1.412(7) C12 -C13 1.411(7)

Table S5 - Bond Distances (Angstrom) (continued)

for: fa440 P2(1)/c R = 0.05

C13 -C18 1.421(8) C52 -C61 1.515(18)

C13 -C14 1.434(9) C61 -C64 1.521(13)

C14 -C15 1.338(10) C61 -C63 1.537(18)

C15 -C16 1.391(11) O7 -H7 0.8400

C21 -C22 1.411(7) C14 -H14 0.9500

C21 -C26 1.371(7) C15 -H15 0.9500

C22 -C23 1.414(7) C16 -H16 0.9500

C23 -C24 1.414(8) C17 -H17C 0.9800

C23 -C28 1.441(8) C17 -H17A 0.9800

C24 -C25 1.353(10) C17 -H17B 0.9800

C25 -C26 1.386(9) C18 -H18 0.9500

C31 -C32 1.415(7) C24 -H24 0.9500

C31 -C36 1.374(8) C25 -H25 0.9500

C32 -C33 1.411(7) C26 -H26 0.9500

C33 -C38 1.434(8) C27 -H27C 0.9800

C33 -C34 1.418(8) C27 -H27B 0.9800

C34 -C35 1.353(9) C27 -H27A 0.9800

C35 -C36 1.400(9) C28 -H28 0.9500

C41 -C42 1.414(7) C34 -H34 0.9500

C41 -C46 1.375(7) C35 -H35 0.9500

C42 -C43 1.412(7) C36 -H36 0.9500

C43 -C44 1.417(8) C37 -H37B 0.9800

C43 -C48 1.419(9) C37 -H37A 0.9800

C44 -C45 1.351(10) C37 -H37C 0.9800

C45 -C46 1.402(9) C38 -H38 0.9500

C51 -C54 1.521(13) C44 -H44 0.9500

C51 -C53 1.537(18) C45 -H45 0.9500

C51 -C52 1.515(18) C46 -H46 0.9500

Table S5 - Bond Distances (Angstrom) (continued)

for: fa440 P2(1)/c R = 0.05

C47 -H47B 0.9800 C63 -H63A 0.9900

C47 -H47A 0.9800 C64 -H64C 0.9800

C47 -H47C 0.9800 C64 -H64A 0.9800

C48 -H48 0.9500 C64 -H64B 0.9800

C52 -H52B 0.9800 O8 -C8 1.44(2)

C52 -H52C 0.9800 C7 -H7B 0.9800

C52 -H52A 0.9800 C7 -H7C 0.9800

C53 -H53C 0.9800 C7 -H7A 0.9800

C53 -H53A 0.9800 O8 -H8 0.8400

C53 -H53B 0.9800 C8 -H8A 0.9800

C54 -H54B 0.9900 C8 -H8B 0.9800

C54 -H54A 0.9900 C8 -H8C 0.9800

C63 -H63B 0.9900

Table S6 - Bond Angles (Degrees)

for: fa440 P2(1)/c R = 0.05

O12 -Ce1 -O13 69.73(13) O22 -Ce1 -O81 130.64(12)

O12 -Ce1 -O21 86.50(12) O22 -Ce1 -O82 178.06(13)

O12 -Ce1 -O22 65.60(11) O31 -Ce1 -O32 60.83(12)

O12 -Ce1 -O31 123.96(12) O31 -Ce1 -O41 65.60(12)

O12 -Ce1 -O32 67.25(12) O31 -Ce1 -O42 82.15(13)

O12 -Ce1 -O41 130.60(12) O31 -Ce1 -O81 72.59(12)

O12 -Ce1 -O42 153.63(12) O31 -Ce1 -O82 69.09(13)

O12 -Ce1 -O81 73.27(11) O32 -Ce1 -O41 85.81(11)

O12 -Ce1 -O82 114.53(12) O32 -Ce1 -O42 138.03(12)

O13 -Ce1 -O21 70.32(14) O32 -Ce1 -O81 72.60(11)

O13 -Ce1 -O22 113.77(13) O32 -Ce1 -O82 110.95(13)

O13 -Ce1 -O31 136.27(13) O41 -Ce1 -O42 59.68(12)

O13 -Ce1 -O32 131.01(13) O41 -Ce1 -O81 138.17(12)

O13 -Ce1 -O41 141.64(13) O41 -Ce1 -O82 113.57(13)

O13 -Ce1 -O42 89.03(13) O42 -Ce1 -O81 116.59(12)

O13 -Ce1 -O81 73.56(13) O42 -Ce1 -O82 68.44(13)

O13 -Ce1 -O82 67.85(14) O81 -Ce1 -O82 48.35(13)

O21 -Ce1 -O22 60.83(12) O11 -Ce2 -O12 60.78(11)

O21 -Ce1 -O31 142.69(13) O11 -Ce2 -O22 120.73(12)

O21 -Ce1 -O32 127.79(12) O11 -Ce2 -O23 138.32(14)

O21 -Ce1 -O41 78.32(12) O11 -Ce2 -O32 110.56(12)

O21 -Ce1 -O42 71.28(13) O11 -Ce2 -O33 70.05(12)

O21 -Ce1 -O81 142.92(12) O11 -Ce2 -O71 97.08(13)

O21 -Ce1 -O82 121.05(13) O11 -Ce2 -O72 134.80(13)

O22 -Ce1 -O31 109.17(12) O11 -Ce2 -O91 70.06(13)

O22 -Ce1 -O32 67.23(12) O11 -Ce2 -O92 71.92(13)

O22 -Ce1 -O41 65.95(11) O12 -Ce2 -O22 66.26(11)

O22 -Ce1 -O42 112.38(12) O12 -Ce2 -O23 132.05(12)

Table S6 - Bond Angles (Degrees) (continued)

for: fa440 P2(1)/c R = 0.05

O12 -Ce2 -O32 66.57(12) O71 -Ce2 -O72 49.19(13)

O12 -Ce2 -O33 90.47(12) O71 -Ce2 -O91 62.72(12)

O12 -Ce2 -O71 153.87(12) O71 -Ce2 -O92 110.07(12)

O12 -Ce2 -O72 137.11(12) O72 -Ce2 -O91 106.65(12)

O12 -Ce2 -O91 115.79(12) O72 -Ce2 -O92 140.63(13)

O12 -Ce2 -O92 77.80(12) O91 -Ce2 -O92 48.35(12)

O22 -Ce2 -O23 68.85(12) Ce2 -O11 -C11 120.5(3)

O22 -Ce2 -O32 67.60(11) Ce2 -O11 -C17 122.7(4)

O22 -Ce2 -O33 135.59(12) C11 -O11 -C17 116.6(4)

O22 -Ce2 -O71 139.59(13) Ce1 -O12 -Ce2 99.01(12)

O22 -Ce2 -O72 101.98(13) Ce1 -O12 -C12 135.3(3)

O22 -Ce2 -O91 114.69(12) Ce2 -O12 -C12 125.7(3)

O22 -Ce2 -O92 72.81(12) Ce1 -O13 -C18 136.9(4)

O23 -Ce2 -O32 110.23(12) Ce1 -O21 -C21 118.0(3)

O23 -Ce2 -O33 134.77(12) Ce1 -O21 -C27 123.6(4)

O23 -Ce2 -O71 73.45(13) C21 -O21 -C27 115.6(4)

O23 -Ce2 -O72 68.32(13) Ce1 -O22 -Ce2 102.76(12)

O23 -Ce2 -O91 69.64(13) Ce1 -O22 -C22 123.9(3)

O23 -Ce2 -O92 73.70(13) Ce2 -O22 -C22 129.1(3)

O32 -Ce2 -O33 68.49(12) Ce2 -O23 -C28 132.9(4)

O32 -Ce2 -O71 114.40(13) Ce1 -O31 -C31 115.3(3)

O32 -Ce2 -O72 70.83(12) Ce1 -O31 -C37 123.0(4)

O32 -Ce2 -O91 177.10(12) C31 -O31 -C37 117.8(4)

O32 -Ce2 -O92 134.54(12) Ce1 -O32 -Ce2 101.51(13)

O33 -Ce2 -O71 67.55(13) Ce1 -O32 -C32 122.2(3)

O33 -Ce2 -O72 69.13(13) Ce2 -O32 -C32 135.1(3)

O33 -Ce2 -O91 109.43(13) Ce2 -O33 -C38 131.6(3)

O33 -Ce2 -O92 141.14(13) Ce1 -O41 -C41 117.6(3)

Table S6 - Bond Angles (Degrees) (continued)

for: fa440 P2(1)/c R = 0.05

Ce1 -O41 -C47 124.5(3) C11 -C12 -C13 117.4(5)

C41 -O41 -C47 117.2(4) O12 -C12 -C11 118.1(5)

Ce1 -O42 -C42 130.7(3) O12 -C12 -C13 124.5(4)

Ce2 -O71 -N7 96.5(3) C12 -C13 -C18 123.2(5)

Ce2 -O72 -N7 97.0(3) C14 -C13 -C18 117.7(5)

Ce1 -O81 -N8 98.3(3) C12 -C13 -C14 119.1(5)

Ce1 -O82 -N8 96.0(3) C13 -C14 -C15 120.8(6)

Ce2 -O91 -N9 96.8(3) C14 -C15 -C16 120.9(6)

Ce2 -O92 -N9 96.5(3) C11 -C16 -C15 120.3(6)

C48 -N4 -C51 129.4(6) O13 -C18 -C13 128.5(6)

C48 -N4 -C61 129.4(6) O21 -C21 -C26 125.7(5)

C54 -O5 -H5 109.00 C22 -C21 -C26 121.7(5)

C63 -O6 -H6 109.00 O21 -C21 -C22 112.5(4)

O71 -N7 -O72 117.2(5) C21 -C22 -C23 117.1(4)

O71 -N7 -O73 121.3(6) O22 -C22 -C21 119.7(4)

O72 -N7 -O73 121.5(6) O22 -C22 -C23 123.1(5)

O81 -N8 -O83 120.9(5) C22 -C23 -C24 120.0(5)

O81 -N8 -O82 116.9(5) C22 -C23 -C28 122.7(5)

O82 -N8 -O83 122.2(5) C24 -C23 -C28 117.2(5)

O91 -N9 -O93 120.7(5) C23 -C24 -C25 120.2(5)

O92 -N9 -O93 122.4(5) C24 -C25 -C26 121.0(5)

O91 -N9 -O92 116.9(4) C21 -C26 -C25 119.9(6)

C48 -N4 -H4 115.00 O23 -C28 -C23 126.1(5)

C51 -N4 -H4 115.00 O31 -C31 -C36 124.8(5)

C61 -N4 -H4 115.00 O31 -C31 -C32 113.8(4)

O11 -C11 -C16 124.8(5) C32 -C31 -C36 121.4(5)

C12 -C11 -C16 121.5(6) O32 -C32 -C31 118.5(4)

O11 -C11 -C12 113.6(5) O32 -C32 -C33 123.9(4)

Table S6 - Bond Angles (Degrees) (continued)

for: fa440 P2(1)/c R = 0.05

C31 -C32 -C33 117.6(5) C63 -C61 -C64 109.2(9)

C32 -C33 -C38 122.7(5) N4 -C61 -C64 107.1(6)

C34 -C33 -C38 117.5(5) N4 -C61 -C52 109.2(8)

C32 -C33 -C34 119.5(5) N4 -C61 -C63 107.7(8)

C33 -C34 -C35 121.0(6) C52 -C61 -C63 109.7(9)

C34 -C35 -C36 120.3(6) C52 -C61 -C64 113.8(10)

C31 -C36 -C35 119.9(6) O6 -C63 -C61 111.6(18)

O33 -C38 -C33 127.9(5) C7 -O7 -H7 110.00

C42 -C41 -C46 121.5(5) C13 -C14 -H14 120.00

O41 -C41 -C42 112.2(4) C15 -C14 -H14 120.00

O41 -C41 -C46 126.3(5) C16 -C15 -H15 120.00

O42 -C42 -C43 122.5(5) C14 -C15 -H15 120.00

O42 -C42 -C41 119.9(4) C11 -C16 -H16 120.00

C41 -C42 -C43 117.6(4) C15 -C16 -H16 120.00

C42 -C43 -C44 119.7(6) O11 -C17 -H17B 110.00

C42 -C43 -C48 119.3(5) O11 -C17 -H17C 109.00

C44 -C43 -C48 121.0(6) O11 -C17 -H17A 110.00

C43 -C44 -C45 121.1(6) H17A -C17 -H17C 110.00

C44 -C45 -C46 120.1(5) H17B -C17 -H17C 109.00

C41 -C46 -C45 120.0(6) H17A -C17 -H17B 109.00

N4 -C48 -C43 124.1(6) O13 -C18 -H18 116.00

C53 -C51 -C54 109.2(9) C13 -C18 -H18 116.00

N4 -C51 -C53 107.7(8) C25 -C24 -H24 120.00

C52 -C51 -C54 113.8(10) C23 -C24 -H24 120.00

N4 -C51 -C52 109.2(8) C24 -C25 -H25 119.00

N4 -C51 -C54 107.1(6) C26 -C25 -H25 120.00

C52 -C51 -C53 109.7(9) C25 -C26 -H26 120.00

O5 -C54 -C51 108.0(9) C21 -C26 -H26 120.00

Table S6 - Bond Angles (Degrees) (continued)

for: fa440 P2(1)/c R = 0.05

O21 -C27 -H27A 110.00 O41 -C47 -H47A 109.00

O21 -C27 -H27C 109.00 O41 -C47 -H47C 109.00

H27A -C27 -H27B 109.00 H47A -C47 -H47B 110.00

O21 -C27 -H27B 110.00 H47A -C47 -H47C 109.00

H27B -C27 -H27C 109.00 H47B -C47 -H47C 109.00

H27A -C27 -H27C 109.00 O41 -C47 -H47B 109.00

C23 -C28 -H28 117.00 N4 -C48 -H48 118.00

O23 -C28 -H28 117.00 C43 -C48 -H48 118.00

C35 -C34 -H34 120.00 C51 -C52 -H52B 109.00

C33 -C34 -H34 119.00 C51 -C52 -H52C 109.00

C34 -C35 -H35 120.00 C61 -C52 -H52A 110.00

C36 -C35 -H35 120.00 C61 -C52 -H52B 109.00

C31 -C36 -H36 120.00 C61 -C52 -H52C 109.00

C35 -C36 -H36 120.00 H52A -C52 -H52B 109.00

O31 -C37 -H37B 110.00 H52A -C52 -H52C 109.00

O31 -C37 -H37C 109.00 H52B -C52 -H52C 109.00

H37A -C37 -H37B 110.00 C51 -C52 -H52A 110.00

H37A -C37 -H37C 109.00 C51 -C53 -H53B 110.00

H37B -C37 -H37C 109.00 C51 -C53 -H53C 109.00

O31 -C37 -H37A 109.00 H53A -C53 -H53B 109.00

O33 -C38 -H38 116.00 H53A -C53 -H53C 110.00

C33 -C38 -H38 116.00 H53B -C53 -H53C 109.00

C45 -C44 -H44 119.00 C51 -C53 -H53A 109.00

C43 -C44 -H44 119.00 O5 -C54 -H54A 110.00

C44 -C45 -H45 120.00 C51 -C54 -H54A 110.00

C46 -C45 -H45 120.00 C51 -C54 -H54B 110.00

C45 -C46 -H46 120.00 H54A -C54 -H54B 108.00

C41 -C46 -H46 120.00 O5 -C54 -H54B 110.00

Table S6 - Bond Angles (Degrees) (continued)

for: fa440 P2(1)/c R = 0.05

O6 -C63 -H63A 109.00 O7 -C7 -H7B 109.00

C61 -C63 -H63A 109.00 O7 -C7 -H7C 109.00

C61 -C63 -H63B 109.00 H7A -C7 -H7B 109.00

O6 -C63 -H63B 109.00 H7A -C7 -H7C 110.00

H63A -C63 -H63B 108.00 H7B -C7 -H7C 109.00

C61 -C64 -H64B 109.00 C8 -O8 -H8 110.00

C61 -C64 -H64C 109.00 O8 -C8 -H8A 109.00

C61 -C64 -H64A 109.00 O8 -C8 -H8B 109.00

H64A -C64 -H64C 109.00 O8 -C8 -H8C 110.00

H64B -C64 -H64C 110.00 H8A -C8 -H8B 109.00

H64A -C64 -H64B 110.00 H8A -C8 -H8C 109.00

O7 -C7 -H7A 110.00 H8B -C8 -H8C 110.00

Table S7 - Torsion Angles (Degrees)

for: fa440 P2(1)/c R = 0.05

O13 -Ce1 -O12 -Ce2 166.72(16)

O13 -Ce1 -O12 -C12 -14.0(4)

O21 -Ce1 -O12 -Ce2 96.42(13)

O21 -Ce1 -O12 -C12 -84.3(4)

O22 -Ce1 -O12 -Ce2 36.98(11)

O22 -Ce1 -O12 -C12 -143.7(5)

O31 -Ce1 -O12 -Ce2 -60.43(16)

O31 -Ce1 -O12 -C12 118.9(4)

O32 -Ce1 -O12 -Ce2 -37.32(11)

O32 -Ce1 -O12 -C12 142.0(5)

O41 -Ce1 -O12 -Ce2 25.05(19)

O41 -Ce1 -O12 -C12 -155.7(4)

O42 -Ce1 -O12 -Ce2 128.5(2)

O42 -Ce1 -O12 -C12 -52.2(5)

O81 -Ce1 -O12 -Ce2 -115.05(14)

O81 -Ce1 -O12 -C12 64.2(4)

O82 -Ce1 -O12 -Ce2 -140.89(13)

O82 -Ce1 -O12 -C12 38.4(5)

O12 -Ce1 -O13 -C18 13.6(6)

O21 -Ce1 -O13 -C18 107.2(6)

O22 -Ce1 -O13 -C18 63.5(6)

O31 -Ce1 -O13 -C18 -104.8(6)

O32 -Ce1 -O13 -C18 -16.3(7)

O41 -Ce1 -O13 -C18 144.2(6)

O42 -Ce1 -O13 -C18 177.6(6)

O81 -Ce1 -O13 -C18 -64.2(6)

O82 -Ce1 -O13 -C18 -115.3(6)

O12 -Ce1 -O21 -C21 -82.4(3)

Table S7 - Torsion Angles (Degrees) (continued)

for: fa440 P2(1)/c R = 0.05

O12 -Ce1 -O21 -C27 117.8(4)

O13 -Ce1 -O21 -C21 -152.1(4)

O13 -Ce1 -O21 -C27 48.1(4)

O22 -Ce1 -O21 -C21 -18.5(3)

O22 -Ce1 -O21 -C27 -178.3(5)

O31 -Ce1 -O21 -C21 65.1(4)

O31 -Ce1 -O21 -C27 -94.8(4)

O32 -Ce1 -O21 -C21 -24.9(4)

O32 -Ce1 -O21 -C27 175.2(4)

O41 -Ce1 -O21 -C21 50.4(3)

O41 -Ce1 -O21 -C27 -109.5(4)

O42 -Ce1 -O21 -C21 112.1(4)

O42 -Ce1 -O21 -C27 -47.8(4)

O81 -Ce1 -O21 -C21 -138.4(3)

O81 -Ce1 -O21 -C27 61.8(5)

O82 -Ce1 -O21 -C21 161.0(3)

O82 -Ce1 -O21 -C27 1.1(5)

O12 -Ce1 -O22 -Ce2 -39.41(12)

O12 -Ce1 -O22 -C22 119.1(4)

O13 -Ce1 -O22 -Ce2 -91.43(16)

O13 -Ce1 -O22 -C22 67.1(4)

O21 -Ce1 -O22 -Ce2 -139.58(18)

O21 -Ce1 -O22 -C22 19.0(3)

O31 -Ce1 -O22 -Ce2 80.04(15)

O31 -Ce1 -O22 -C22 -121.4(3)

O32 -Ce1 -O22 -Ce2 34.92(12)

O32 -Ce1 -O22 -C22 -166.6(4)

O41 -Ce1 -O22 -Ce2 130.69(16)

Table S7 - Torsion Angles (Degrees) (continued)

for: fa440 P2(1)/c R = 0.05

O41 -Ce1 -O22 -C22 -70.8(3)

O42 -Ce1 -O22 -Ce2 169.29(12)

O42 -Ce1 -O22 -C22 -32.2(4)

O81 -Ce1 -O22 -Ce2 -3.1(2)

O81 -Ce1 -O22 -C22 155.4(3)

O12 -Ce1 -O31 -C31 1.9(4)

O12 -Ce1 -O31 -C37 -155.1(4)

O13 -Ce1 -O31 -C31 97.7(4)

O13 -Ce1 -O31 -C37 -59.4(5)

O21 -Ce1 -O31 -C31 -137.7(3)

O21 -Ce1 -O31 -C37 65.3(5)

O22 -Ce1 -O31 -C31 -71.0(3)

O22 -Ce1 -O31 -C37 132.0(4)

O32 -Ce1 -O31 -C31 -22.6(3)

O32 -Ce1 -O31 -C37 -179.6(4)

O41 -Ce1 -O31 -C31 -121.9(4)

O41 -Ce1 -O31 -C37 81.1(4)

O42 -Ce1 -O31 -C31 178.0(3)

O42 -Ce1 -O31 -C37 20.9(4)

O81 -Ce1 -O31 -C31 56.8(3)

O81 -Ce1 -O31 -C37 -100.2(4)

O82 -Ce1 -O31 -C31 108.1(4)

O82 -Ce1 -O31 -C37 -48.9(4)

O12 -Ce1 -O32 -Ce2 38.28(11)

O12 -Ce1 -O32 -C32 -130.9(3)

O13 -Ce1 -O32 -Ce2 68.7(2)

O13 -Ce1 -O32 -C32 -100.4(3)

O21 -Ce1 -O32 -Ce2 -27.59(19)

Table S7 - Torsion Angles (Degrees) (continued)

for: fa440 P2(1)/c R = 0.05

O21 -Ce1 -O32 -C32 163.3(3)

O22 -Ce1 -O32 -Ce2 -33.67(11)

O22 -Ce1 -O32 -C32 157.2(4)

O31 -Ce1 -O32 -Ce2 -163.62(17)

O31 -Ce1 -O32 -C32 27.2(3)

O41 -Ce1 -O32 -Ce2 -99.31(13)

O41 -Ce1 -O32 -C32 91.6(3)

O42 -Ce1 -O32 -Ce2 -132.34(15)

O42 -Ce1 -O32 -C32 58.5(4)

O81 -Ce1 -O32 -Ce2 116.99(14)

O81 -Ce1 -O32 -C32 -52.2(3)

O82 -Ce1 -O32 -Ce2 147.03(12)

O82 -Ce1 -O32 -C32 -22.1(4)

O12 -Ce1 -O41 -C41 149.2(3)

O12 -Ce1 -O41 -C47 -40.8(5)

O13 -Ce1 -O41 -C41 38.9(4)

O13 -Ce1 -O41 -C47 -151.1(4)

O21 -Ce1 -O41 -C41 74.3(3)

O21 -Ce1 -O41 -C47 -115.8(4)

O22 -Ce1 -O41 -C41 137.3(4)

O22 -Ce1 -O41 -C47 -52.7(4)

O31 -Ce1 -O41 -C41 -96.0(4)

O31 -Ce1 -O41 -C47 74.0(4)

O32 -Ce1 -O41 -C41 -155.8(3)

O32 -Ce1 -O41 -C47 14.2(4)

O42 -Ce1 -O41 -C41 -0.8(3)

O42 -Ce1 -O41 -C47 169.3(5)

O81 -Ce1 -O41 -C41 -97.9(4)

Table S7 - Torsion Angles (Degrees) (continued)

for: fa440 P2(1)/c R = 0.05

O81 -Ce1 -O41 -C47 72.1(5)

O82 -Ce1 -O41 -C41 -44.7(4)

O82 -Ce1 -O41 -C47 125.3(4)

O12 -Ce1 -O42 -C42 -119.6(4)

O13 -Ce1 -O42 -C42 -155.1(4)

O21 -Ce1 -O42 -C42 -85.6(4)

O22 -Ce1 -O42 -C42 -39.7(4)

O31 -Ce1 -O42 -C42 67.8(4)

O32 -Ce1 -O42 -C42 40.6(5)

O41 -Ce1 -O42 -C42 1.6(4)

O81 -Ce1 -O42 -C42 133.8(4)

O82 -Ce1 -O42 -C42 138.4(4)

O12 -Ce1 -O81 -N8 -144.3(3)

O13 -Ce1 -O81 -N8 -71.0(3)

O21 -Ce1 -O81 -N8 -84.5(4)

O22 -Ce1 -O81 -N8 -178.5(3)

O31 -Ce1 -O81 -N8 80.9(3)

O32 -Ce1 -O81 -N8 145.0(3)

O41 -Ce1 -O81 -N8 82.7(3)

O42 -Ce1 -O81 -N8 9.4(3)

O82 -Ce1 -O81 -N8 3.7(3)

O12 -Ce1 -O82 -N8 30.3(4)

O13 -Ce1 -O82 -N8 83.7(3)

O21 -Ce1 -O82 -N8 131.6(3)

O31 -Ce1 -O82 -N8 -88.6(3)

O32 -Ce1 -O82 -N8 -43.4(3)

O41 -Ce1 -O82 -N8 -138.1(3)

O42 -Ce1 -O82 -N8 -178.2(4)

Table S7 - Torsion Angles (Degrees) (continued)

for: fa440 P2(1)/c R = 0.05

O81 -Ce1 -O82 -N8 -3.7(3)

O12 -Ce2 -O11 -C11 9.7(4)

O12 -Ce2 -O11 -C17 -176.1(5)

O22 -Ce2 -O11 -C11 -19.9(4)

O22 -Ce2 -O11 -C17 154.3(4)

O23 -Ce2 -O11 -C11 -112.0(4)

O23 -Ce2 -O11 -C17 62.2(5)

O32 -Ce2 -O11 -C11 55.6(4)

O32 -Ce2 -O11 -C17 -130.2(4)

O33 -Ce2 -O11 -C11 112.0(4)

O33 -Ce2 -O11 -C17 -73.8(4)

O71 -Ce2 -O11 -C11 175.0(4)

O71 -Ce2 -O11 -C17 -10.8(4)

O72 -Ce2 -O11 -C11 138.6(4)

O72 -Ce2 -O11 -C17 -47.2(5)

O91 -Ce2 -O11 -C11 -127.4(4)

O91 -Ce2 -O11 -C17 46.8(4)

O92 -Ce2 -O11 -C11 -76.2(4)

O92 -Ce2 -O11 -C17 98.1(4)

O11 -Ce2 -O12 -Ce1 169.87(17)

O11 -Ce2 -O12 -C12 -9.5(3)

O22 -Ce2 -O12 -Ce1 -37.79(11)

O22 -Ce2 -O12 -C12 142.8(4)

O23 -Ce2 -O12 -Ce1 -59.75(19)

O23 -Ce2 -O12 -C12 120.9(4)

O32 -Ce2 -O12 -Ce1 36.95(11)

O32 -Ce2 -O12 -C12 -142.4(4)

O33 -Ce2 -O12 -Ce1 103.17(12)

Table S7 - Torsion Angles (Degrees) (continued)

for: fa440 P2(1)/c R = 0.05

O33 -Ce2 -O12 -C12 -76.2(4)

O71 -Ce2 -O12 -Ce1 134.9(2)

O71 -Ce2 -O12 -C12 -44.5(5)

O72 -Ce2 -O12 -Ce1 44.1(2)

O72 -Ce2 -O12 -C12 -135.2(4)

O91 -Ce2 -O12 -Ce1 -144.90(12)

O91 -Ce2 -O12 -C12 35.7(4)

O92 -Ce2 -O12 -Ce1 -114.19(14)

O92 -Ce2 -O12 -C12 66.4(4)

O11 -Ce2 -O22 -Ce1 67.08(17)

O11 -Ce2 -O22 -C22 -89.9(4)

O12 -Ce2 -O22 -Ce1 38.95(12)

O12 -Ce2 -O22 -C22 -118.0(4)

O23 -Ce2 -O22 -Ce1 -158.37(17)

O23 -Ce2 -O22 -C22 44.7(4)

O32 -Ce2 -O22 -Ce1 -34.28(12)

O32 -Ce2 -O22 -C22 168.7(4)

O33 -Ce2 -O22 -Ce1 -25.2(2)

O33 -Ce2 -O22 -C22 177.8(3)

O71 -Ce2 -O22 -Ce1 -136.11(16)

O71 -Ce2 -O22 -C22 66.9(4)

O72 -Ce2 -O22 -Ce1 -97.51(14)

O72 -Ce2 -O22 -C22 105.5(4)

O91 -Ce2 -O22 -Ce1 147.67(12)

O91 -Ce2 -O22 -C22 -9.3(4)

O92 -Ce2 -O22 -Ce1 122.89(15)

O92 -Ce2 -O22 -C22 -34.1(4)

O11 -Ce2 -O23 -C28 86.0(6)

Table S7 - Torsion Angles (Degrees) (continued)

for: fa440 P2(1)/c R = 0.05

O12 -Ce2 -O23 -C28 -5.4(6)

O22 -Ce2 -O23 -C28 -26.9(5)

O32 -Ce2 -O23 -C28 -81.6(5)

O33 -Ce2 -O23 -C28 -160.9(5)

O71 -Ce2 -O23 -C28 168.0(5)

O72 -Ce2 -O23 -C28 -140.0(6)

O91 -Ce2 -O23 -C28 101.5(5)

O92 -Ce2 -O23 -C28 50.6(5)

O11 -Ce2 -O32 -Ce1 -81.34(14)

O11 -Ce2 -O32 -C32 85.6(4)

O12 -Ce2 -O32 -Ce1 -38.30(11)

O12 -Ce2 -O32 -C32 128.6(4)

O22 -Ce2 -O32 -Ce1 34.48(12)

O22 -Ce2 -O32 -C32 -158.6(4)

O23 -Ce2 -O32 -Ce1 89.89(14)

O23 -Ce2 -O32 -C32 -103.2(4)

O33 -Ce2 -O32 -Ce1 -138.69(15)

O33 -Ce2 -O32 -C32 28.3(4)

O71 -Ce2 -O32 -Ce1 170.32(12)

O71 -Ce2 -O32 -C32 -22.7(4)

O72 -Ce2 -O32 -Ce1 146.87(16)

O72 -Ce2 -O32 -C32 -46.2(4)

O92 -Ce2 -O32 -Ce1 3.2(2)

O92 -Ce2 -O32 -C32 170.1(4)

O11 -Ce2 -O33 -C38 -155.6(5)

O12 -Ce2 -O33 -C38 -97.1(5)

O22 -Ce2 -O33 -C38 -41.6(6)

O23 -Ce2 -O33 -C38 65.0(5)

Table S7 - Torsion Angles (Degrees) (continued)

for: fa440 P2(1)/c R = 0.05

O32 -Ce2 -O33 -C38 -32.6(5)

O71 -Ce2 -O33 -C38 97.4(5)

O72 -Ce2 -O33 -C38 44.3(5)

O91 -Ce2 -O33 -C38 145.2(5)

O92 -Ce2 -O33 -C38 -168.0(5)

O11 -Ce2 -O71 -N7 -144.1(4)

O12 -Ce2 -O71 -N7 -113.8(4)

O22 -Ce2 -O71 -N7 55.9(4)

O23 -Ce2 -O71 -N7 77.5(4)

O32 -Ce2 -O71 -N7 -27.6(4)

O33 -Ce2 -O71 -N7 -79.1(4)

O72 -Ce2 -O71 -N7 2.1(3)

O91 -Ce2 -O71 -N7 152.7(4)

O92 -Ce2 -O71 -N7 142.7(3)

O11 -Ce2 -O72 -N7 49.0(4)

O12 -Ce2 -O72 -N7 142.3(3)

O22 -Ce2 -O72 -N7 -149.8(3)

O23 -Ce2 -O72 -N7 -88.6(3)

O32 -Ce2 -O72 -N7 149.3(4)

O33 -Ce2 -O72 -N7 75.7(3)

O71 -Ce2 -O72 -N7 -2.1(3)

O91 -Ce2 -O72 -N7 -29.2(4)

O92 -Ce2 -O72 -N7 -72.4(4)

O11 -Ce2 -O91 -N9 90.2(3)

O12 -Ce2 -O91 -N9 49.0(3)

O22 -Ce2 -O91 -N9 -25.4(3)

O23 -Ce2 -O91 -N9 -78.9(3)

O33 -Ce2 -O91 -N9 149.4(3)

Table S7 - Torsion Angles (Degrees) (continued)

for: fa440 P2(1)/c R = 0.05

O71 -Ce2 -O91 -N9 -160.3(3)

O72 -Ce2 -O91 -N9 -137.4(3)

O92 -Ce2 -O91 -N9 7.0(3)

O11 -Ce2 -O92 -N9 -86.2(3)

O12 -Ce2 -O92 -N9 -149.1(3)

O22 -Ce2 -O92 -N9 142.2(3)

O23 -Ce2 -O92 -N9 69.9(3)

O32 -Ce2 -O92 -N9 172.5(3)

O33 -Ce2 -O92 -N9 -73.9(4)

O71 -Ce2 -O92 -N9 4.9(3)

O72 -Ce2 -O92 -N9 54.2(4)

O91 -Ce2 -O92 -N9 -7.1(3)

Ce2 -O11 -C11 -C12 -9.9(6)

Ce2 -O11 -C11 -C16 171.7(5)

C17 -O11 -C11 -C12 175.5(5)

C17 -O11 -C11 -C16 -2.8(8)

Ce1 -O12 -C12 -C11 -170.7(3)

Ce1 -O12 -C12 -C13 10.3(8)

Ce2 -O12 -C12 -C11 8.4(6)

Ce2 -O12 -C12 -C13 -170.6(4)

Ce1 -O13 -C18 -C13 -9.1(11)

Ce1 -O21 -C21 -C22 17.5(5)

Ce1 -O21 -C21 -C26 -163.1(4)

C27 -O21 -C21 -C22 179.0(5)

C27 -O21 -C21 -C26 -1.6(7)

Ce1 -O22 -C22 -C21 -18.3(6)

Ce1 -O22 -C22 -C23 160.6(4)

Ce2 -O22 -C22 -C21 134.4(4)

Table S7 - Torsion Angles (Degrees) (continued)

for: fa440 P2(1)/c R = 0.05

Ce2 -O22 -C22 -C23 -46.8(6)

Ce2 -O23 -C28 -C23 8.6(9)

Ce1 -O31 -C31 -C32 18.1(5)

Ce1 -O31 -C31 -C36 -161.9(5)

C37 -O31 -C31 -C32 176.4(5)

C37 -O31 -C31 -C36 -3.6(8)

Ce1 -O32 -C32 -C31 -30.0(6)

Ce1 -O32 -C32 -C33 148.6(4)

Ce2 -O32 -C32 -C31 165.2(3)

Ce2 -O32 -C32 -C33 -16.3(7)

Ce2 -O33 -C38 -C33 26.3(9)

Ce1 -O41 -C41 -C42 0.1(5)

Ce1 -O41 -C41 -C46 -179.9(4)

C47 -O41 -C41 -C42 -170.6(5)

C47 -O41 -C41 -C46 9.4(8)

Ce1 -O42 -C42 -C41 -2.2(7)

Ce1 -O42 -C42 -C43 179.7(4)

Ce2 -O71 -N7 -O72 -3.7(6)

Ce2 -O71 -N7 -O73 175.6(6)

Ce2 -O72 -N7 -O71 3.7(6)

Ce2 -O72 -N7 -O73 -175.6(6)

Ce1 -O81 -N8 -O82 -6.5(5)

Ce1 -O81 -N8 -O83 174.0(5)

Ce1 -O82 -N8 -O81 6.4(5)

Ce1 -O82 -N8 -O83 -174.1(5)

Ce2 -O91 -N9 -O92 -12.4(5)

Ce2 -O91 -N9 -O93 171.2(5)

Ce2 -O92 -N9 -O91 12.4(5)

Table S7 - Torsion Angles (Degrees) (continued)

for: fa440 P2(1)/c R = 0.05

Ce2 -O92 -N9 -O93 -171.3(5)

C51 -N4 -C48 -C43 -177.9(7)

C48 -N4 -C51 -C52 -40.6(12)

C48 -N4 -C51 -C53 78.4(10)

C48 -N4 -C51 -C54 -164.3(8)

O11 -C11 -C12 -O12 1.5(7)

O11 -C11 -C12 -C13 -179.4(5)

C16 -C11 -C12 -O12 179.9(5)

C16 -C11 -C12 -C13 -1.0(8)

O11 -C11 -C16 -C15 178.5(6)

C12 -C11 -C16 -C15 0.3(10)

O12 -C12 -C13 -C14 179.8(5)

O12 -C12 -C13 -C18 3.0(9)

C11 -C12 -C13 -C14 0.8(8)

C11 -C12 -C13 -C18 -176.0(5)

C12 -C13 -C14 -C15 0.1(9)

C18 -C13 -C14 -C15 177.1(6)

C12 -C13 -C18 -O13 -4.0(10)

C14 -C13 -C18 -O13 179.2(6)

C13 -C14 -C15 -C16 -0.9(10)

C14 -C15 -C16 -C11 0.7(10)

O21 -C21 -C22 -O22 -1.1(6)

O21 -C21 -C22 -C23 -180.0(4)

C26 -C21 -C22 -O22 179.5(5)

C26 -C21 -C22 -C23 0.6(7)

O21 -C21 -C26 -C25 177.8(5)

C22 -C21 -C26 -C25 -2.8(8)

O22 -C22 -C23 -C24 -176.8(5)

Table S7 - Torsion Angles (Degrees) (continued)

for: fa440 P2(1)/c R = 0.05

O22 -C22 -C23 -C28 7.0(8)

C21 -C22 -C23 -C24 2.1(7)

C21 -C22 -C23 -C28 -174.1(5)

C22 -C23 -C24 -C25 -2.6(8)

C28 -C23 -C24 -C25 173.8(5)

C22 -C23 -C28 -O23 11.9(9)

C24 -C23 -C28 -O23 -164.5(6)

C23 -C24 -C25 -C26 0.4(9)

C24 -C25 -C26 -C21 2.3(8)

O31 -C31 -C32 -O32 5.1(7)

O31 -C31 -C32 -C33 -173.5(4)

C36 -C31 -C32 -O32 -174.9(5)

C36 -C31 -C32 -C33 6.5(8)

O31 -C31 -C36 -C35 177.7(6)

C32 -C31 -C36 -C35 -2.3(9)

O32 -C32 -C33 -C34 175.4(5)

O32 -C32 -C33 -C38 -10.6(8)

C31 -C32 -C33 -C34 -6.0(7)

C31 -C32 -C33 -C38 168.0(5)

C32 -C33 -C34 -C35 1.5(9)

C38 -C33 -C34 -C35 -172.8(6)

C32 -C33 -C38 -O33 4.9(9)

C34 -C33 -C38 -O33 179.0(6)

C33 -C34 -C35 -C36 2.9(10)

C34 -C35 -C36 -C31 -2.6(10)

O41 -C41 -C42 -O42 1.1(7)

O41 -C41 -C42 -C43 179.2(4)

C46 -C41 -C42 -O42 -178.9(5)

Table S7 - Torsion Angles (Degrees) (continued)

for: fa440 P2(1)/c R = 0.05

C46 -C41 -C42 -C43 -0.7(8)

O41 -C41 -C46 -C45 -179.7(5)

C42 -C41 -C46 -C45 0.3(8)

O42 -C42 -C43 -C44 178.3(5)

O42 -C42 -C43 -C48 -0.7(8)

C41 -C42 -C43 -C44 0.2(8)

C41 -C42 -C43 -C48 -178.8(5)

C42 -C43 -C44 -C45 0.9(9)

C48 -C43 -C44 -C45 179.9(6)

C42 -C43 -C48 -N4 -1.4(10)

C44 -C43 -C48 -N4 179.7(6)

C43 -C44 -C45 -C46 -1.4(10)

C44 -C45 -C46 -C41 0.8(9)

N4 -C51 -C54 -O5 65.1(11)

C52 -C51 -C54 -O5 -55.7(11)

C53 -C51 -C54 -O5 -178.6(10)

Table S8 - Contact Distances (Angstrom)

for: fa440 P2(1)/c R = 0.05

Ce1 .O83 4.264(6) O7 .O93 2.867(13)

Ce1 .C13 3.938(5) O7 .O6_g 2.83(4)

Ce1 .C22 3.390(5) O7 .O8 2.851(15)

Ce1 .C32 3.337(5) O8 .O7 2.851(15)

Ce1 .C42 3.391(4) O8 .O6_g 2.50(3)

Ce2 .C12 3.446(5) O11 .O91 3.014(6)

Ce2 .C23 3.863(5) O11 .O12 2.603(5)

Ce2 .C33 3.920(5) O11 .O92 3.091(6)

Ce2 .O93 4.263(4) O11 .O33 2.963(6)

Ce2 .O73 4.242(5) O12 .O13 2.843(5)

Ce1 .H47B 3.6100 O12 .O11 2.603(5)

Ce1 .H37C 3.5200 O12 .O81 3.049(5)

Ce1 .H4 3.8300 O12 .O32 2.747(5)

Ce1 .H27B 4.0200 O12 .O22 2.700(5)

Ce1 .H27C 3.5300 O13 .O82 2.858(6)

Ce2 .H17B 3.4200 O13 .O81 3.035(6)

Ce2 .H47B 3.8200 O13 .O12 2.843(5)

O5 .O82 2.865(14) O13 .O21 2.953(6)

O5 .N4 2.836(14) O21 .O42 2.947(6)

O5 .C52 2.886(19) O21 .O13 2.953(6)

O6 .C8_j 2.93(3) O21 .O22 2.602(5)

O6 .C51 2.44(3) O22 .O32 2.728(5)

O6 .C48 3.02(4) O22 .O23 2.802(5)

O6 .C51 2.44(3) O22 .O21 2.602(5)

O6 .N4 2.86(4) O22 .O41 2.866(5)

O6 .O8_j 2.50(3) O22 .O92 3.007(5)

O6 .C52 2.89(4) O22 .O12 2.700(5)

O6 .O7_i 2.83(4) O23 .O22 2.802(5)

Table S8 - Contact Distances (Angstrom) (continued)

for: fa440 P2(1)/c R = 0.05

O23 .O72 2.877(6) O71 .O72 2.163(6)

O23 .O92 3.106(6) O71 .O91 2.726(6)

O23 .O91 2.949(6) O72 .C63_f 3.269(15)

O23 .O71 3.078(6) O72 .O33 2.908(5)

O31 .O32 2.601(5) O72 .O32 2.941(5)

O31 .O41 2.950(6) O72 .O23 2.877(6)

O31 .O81 3.122(5) O72 .C33 3.182(7)

O31 .O82 3.018(6) O72 .O71 2.163(6)

O32 .O33 2.827(5) O72 .C53_f 3.269(15)

O32 .O81 2.993(5) O73 .Ce2 4.242(5)

O32 .O12 2.747(5) O73 .C18_f 3.294(9)

O32 .O22 2.728(5) O81 .C45_d 3.378(7)

O32 .O31 2.601(5) O81 .O31 3.122(5)

O32 .O72 2.941(5) O81 .O12 3.049(5)

O33 .O32 2.827(5) O81 .O82 2.150(6)

O33 .O11 2.963(6) O81 .O13 3.035(6)

O33 .O72 2.908(5) O81 .O32 2.993(5)

O33 .O71 2.862(6) O82 .O13 2.858(6)

O41 .O42 2.589(5) O82 .O5 2.865(14)

O41 .O31 2.950(6) O82 .O31 3.018(6)

O41 .O22 2.866(5) O82 .O81 2.150(6)

O42 .O21 2.947(6) O82 .O42 2.842(5)

O42 .O41 2.589(5) O83 .C48_b 3.142(9)

O42 .C48 2.813(7) O83 .Ce1 4.264(6)

O42 .O82 2.842(5) O91 .O23 2.949(6)

O42 .N4 2.575(6) O91 .O92 2.157(5)

O71 .O23 3.078(6) O91 .O71 2.726(6)

O71 .O33 2.862(6) O91 .O11 3.014(6)

Table S8 - Contact Distances (Angstrom) (continued)

for: fa440 P2(1)/c R = 0.05

O91 .C7 3.354(15) N7 .O23 3.206(7)

O92 .C23 3.253(7) O7 .H8 2.3200

O92 .O22 3.007(5) N8 .O13 3.095(6)

O92 .O11 3.091(6) O8 .H6_g 2.3400

O92 .O91 2.157(5) O8 .H7 2.2000

O92 .O23 3.106(6) O8 .H38_t 2.5500

O93 .C27_g 3.280(8) O8 .H35_u 2.5400

O93 .Ce2 4.263(4) O8 .H53B_g 2.8800

O93 .C15_h 3.323(9) N9 .O23 3.112(6)

O93 .O7 2.867(13) O11 .H16 2.6500

N4 .O6 2.86(4) O13 .H27C 2.5000

N4 .O5 2.836(14) O21 .H26 2.6800

N4 .C42 2.828(7) O22 .H47B 2.6800

N4 .O42 2.575(6) O23 .H28_c 2.9000

O5 .H4 2.7100 O31 .H36 2.6600

O5 .H52C_b 2.7800 O33 .H46_d 2.8400

O5 .H8C_a 2.9000 O33 .H45_d 2.8600

O5 .H52A 2.5800 O41 .H46 2.6800

O6 .H53A 1.9500 O42 .H4 1.8500

O6 .H48 2.7300 O42 .H37C 2.6500

O6 .H53C 1.9700 O71 .H28_c 2.7700

O6 .H52C 2.5200 O71 .H7B_e 2.7300

O6 .H7_i 2.5800 O71 .H24_c 2.6800

O6 .H8_j 2.8700 O72 .H63B_f 2.8000

O6 .H8A_j 2.5000 O72 .H63A_f 2.8100

N7 .C38 3.322(8) O72 .H53A_f 2.8300

N7 .O33 3.022(7) O72 .H53C_f 2.8200

O7 .H6_g 2.0800 O73 .H54B_f 2.8600

Table S8 - Contact Distances (Angstrom) (continued)

for: fa440 P2(1)/c R = 0.05

O73 .H18_f 2.6400 C11 .O12 2.342(6)

O73 .H64B_f 2.8100 C11 .C45_d 3.380(8)

O73 .H27C_f 2.8800 C12 .C15 2.805(8)

O73 .H24_c 2.8200 C12 .C45_d 3.469(8)

O81 .H45_d 2.6900 C12 .O13 2.955(6)

O81 .H44_d 2.8700 C12 .O11 2.362(6)

O82 .H5 2.3300 C13 .C16 2.787(9)

O83 .H37C_b 2.8400 C13 .Ce1 3.938(5)

O83 .H52A_b 2.8600 C14 .C11 2.764(9)

O91 .H28_c 2.6600 C15 .C12 2.805(8)

O91 .H17B 2.7500 C15 .O93_h 3.323(9)

O92 .H26_g 2.6600 C16 .C26_d 3.563(9)

O92 .H27A_g 2.8100 C16 .C17 2.811(11)

O93 .H27B_g 2.8600 C16 .C13 2.787(9)

O93 .H15_h 2.4300 C17 .O91 3.115(8)

N4 .H64C 2.6000 C17 .C16 2.811(11)

N4 .H52C 2.6500 C18 .O12 2.928(7)

N4 .H53B 2.6200 C18 .O73_k 3.294(9)

N4 .H63A 2.6300 C21 .O22 2.358(6)

N4 .H64B 2.6000 C21 .C24 2.765(8)

N4 .H54B 2.5800 C22 .O21 2.334(6)

N4 .H53C 2.6200 C22 .O92 3.036(6)

N4 .H5 2.4800 C22 .C47 3.461(8)

N4 .H52A 2.6200 C22 .O23 2.939(6)

C7 .O91 3.354(15) C22 .C25 2.803(7)

C8 .O6_g 2.93(3) C22 .O41 3.178(6)

N9 .H15_h 2.8500 C23 .C26 2.778(8)

C11 .C14 2.764(9) C23 .Ce2 3.863(5)

Table S8 - Contact Distances (Angstrom) (continued)

for: fa440 P2(1)/c R = 0.05

C23 .O92 3.253(7) C37 .O82 3.156(8)

C24 .C21 2.765(8) C37 .O42 3.394(8)

C25 .C22 2.803(7) C37 .C36 2.841(10)

C26 .C27 2.810(9) C38 .O72 3.066(7)

C26 .C23 2.778(8) C38 .O32 2.926(7)

C26 .C16_l 3.563(9) C38 .N7 3.322(8)

C27 .O93_g 3.280(8) C41 .O42 2.358(6)

C27 .C26 2.810(9) C41 .C44 2.768(8)

C27 .O13 3.149(8) C42 .C37 3.597(8)

C27 .O42 3.171(8) C42 .C45 2.815(7)

C28 .O22 2.916(7) C42 .O41 2.314(6)

C28 .O92 3.351(7) C42 .N4 2.828(7)

C31 .O32 2.341(6) C43 .C46 2.786(9)

C31 .O81 3.240(6) C44 .C41 2.768(8)

C31 .C34 2.768(8) C45 .C42 2.815(7)

C32 .C35 2.810(8) C45 .C11_l 3.380(8)

C32 .O33 2.957(6) C45 .C12_l 3.469(8)

C32 .O72 3.204(6) C45 .O81_l 3.378(7)

C32 .O31 2.341(6) C46 .C43 2.786(9)

C32 .O81 3.103(6) C46 .C47 2.862(9)

C33 .C36 2.789(8) C47 .C46 2.862(9)

C33 .O72 3.182(7) C47 .C22 3.461(8)

C33 .Ce2 3.920(5) C47 .O22 3.150(7)

C34 .C31 2.768(8) C48 .O42 2.813(7)

C35 .C32 2.810(8) C48 .C53 3.179(15)

C36 .C37 2.841(10) C48 .O83_n 3.142(9)

C36 .C33 2.789(8) C48 .O6 3.02(4)

C37 .C42 3.597(8) C48 .C53 3.179(15)

Table S8 - Contact Distances (Angstrom) (continued)

for: fa440 P2(1)/c R = 0.05

C48 .C52 2.936(16) C21 .H27B 2.6600

C52 .C48 2.936(16) C21 .H27A 2.5400

C52 .O5 2.886(19) C24 .H28 2.5700

C52 .O6 2.89(4) C25 .H16_l 2.8700

C53 .O72_k 3.269(15) C26 .H16_l 2.7100

C53 .C48 3.179(15) C26 .H27B 2.8500

C61 .O5 2.405(16) C26 .H27A 2.6200

C63 .C48 3.179(15) C27 .H26 2.5200

C63 .C54 2.492(18) C28 .H24 2.5900

C63 .O72_k 3.269(15) C31 .H37B 2.6400

C63 .C54 2.492(18) C31 .H37A 2.6700

C64 .C53 2.492(18) C34 .H38 2.5400

C64 .C53 2.492(18) C34 .H64A_f 2.9200

C7 .H17B_t 2.8200 C34 .H52B_m 2.9900

C7 .H8 2.8000 C34 .H37A_b 2.8300

C8 .H6_g 3.0500 C34 .H54A_f 2.9100

C8 .H38_t 2.9400 C35 .H37A_b 2.9300

C11 .H17C 2.6600 C36 .H37B 2.7700

C11 .H17A 2.5900 C36 .H37A 2.7900

C13 .H25_g 2.7100 C37 .H36 2.5400

C14 .H25_g 2.9900 C38 .H45_d 3.0600

C14 .H18 2.5300 C38 .H34 2.5900

C16 .H17A 2.7000 C41 .H37C 3.0700

C16 .H17C 2.7900 C41 .H47A 2.6500

C17 .H7A_e 3.0200 C41 .H47C 2.6300

C17 .H16 2.5000 C42 .H37C 2.7500

C18 .H14 2.6000 C42 .H4 2.4500

C18 .H25_g 2.8700 C43 .H4 2.4800

Table S8 - Contact Distances (Angstrom) (continued)

for: fa440 P2(1)/c R = 0.05

C44 .H48 2.6200 C53 .H4 2.9400

C44 .H37B_n 2.9400 C54 .H53A 2.7100

C45 .H37B_n 2.8800 C54 .H53C 2.6500

C46 .H47A 2.7700 C54 .H4 2.4100

C46 .H17A_l 3.0700 C54 .H52B 2.7300

C46 .H47C 2.8300 C54 .H52A 2.7600

C47 .H7_o 2.9700 C61 .H54A 2.0800

C47 .H46 2.5800 C61 .H5 2.5200

C48 .H52A 3.0400 C61 .H54B 2.0800

C48 .H53B 2.9600 C61 .H53A 2.0800

C48 .H44 2.6400 C61 .H53B 2.0800

C48 .H52C 2.7400 C61 .H53C 2.0800

C51 .H5 2.5200 C61 .H48 2.6700

C51 .H48 2.6700 C63 .H52C 2.6400

C52 .H8C_a 2.9800 C63 .H64A 2.7000

C52 .H64C 2.7500 C63 .H64B 2.6500

C52 .H54A 2.7900 C63 .H52B 2.7100

C52 .H53B 2.6800 C63 .H4 2.9400

C52 .H64A 2.7400 C63 .H54A 2.6700

C52 .H48 2.6900 C63 .H54B 2.6900

C52 .H34_p 2.8500 C64 .H52B 2.7300

C52 .H63B 2.7100 C64 .H53A 2.7100

C52 .H53A 2.6900 C64 .H53C 2.6500

C52 .H5 3.0800 C64 .H63A 2.6500

C53 .H54B 2.6900 C64 .H4 2.4100

C53 .H52C 2.6400 C64 .H63B 2.7000

C53 .H54A 2.6700 C64 .H5 1.9000

C53 .H52B 2.7100 C64 .H52A 2.7600

Table S8 - Contact Distances (Angstrom) (continued)

for: fa440 P2(1)/c R = 0.05

H4 .O42 1.8500 H6 .O8_j 2.3400

H4 .C42 2.4500 H6 .H63A 2.2000

H4 .C43 2.4800 H6 .H63B 2.1900

H4 .C53 2.9400 H7 .H47A_c 2.3700

H4 .C54 2.4100 H7 .H6_g 1.8200

H4 .Ce1 3.8300 H7 .H8 1.6800

H4 .O5 2.7100 H7 .O8 2.2000

H4 .H5 2.2300 H7 .C47_c 2.9700

H4 .C53 2.9400 H7 .H7B 2.0600

H4 .C54 2.4100 H7 .H7A 2.3200

H4 .H64B 2.3400 H7 .O6_g 2.5800

H4 .H54B 2.2900 H7A .H7 2.3200

H4 .H64C 2.4800 H7A .H17B_t 2.2400

H5 .H4 2.2300 H7A .C17_t 3.0200

H5 .C51 2.5200 H7B .H8 2.3500

H5 .H54B 2.2600 H7B .H17B_t 2.5500

H5 .N4 2.4800 H7B .H7 2.0600

H5 .C52 3.0800 H7B .O71_t 2.7300

H5 .O82 2.3300 H8 .H7 1.6800

H6 .H53B 1.1000 H8 .C7 2.8000

H6 .H7_i 1.8200 H8 .O7 2.3200

H6 .H53A 2.1700 H8 .H8B 2.1000

H6 .H53C 2.2000 H8 .H7B 2.3500

H6 .H8_j 2.4800 H8 .H8A 2.3700

H6 .C8_j 3.0500 H8 .H6_g 2.4800

H6 .C53 1.8700 H8 .O6_g 2.8700

H6 .C53 1.8700 H8 .H38_t 2.4000

H6 .O7_i 2.0800 H8A .H48_g 2.5600

Table S8 - Contact Distances (Angstrom) (continued)

for: fa440 P2(1)/c R = 0.05

H8A .H8 2.3700 H17B .Ce2 3.4200

H8A .O6_g 2.5000 H17B .H7B_e 2.5500

H8B .H8 2.1000 H17C .H16 2.3200

H8B .H18_h 2.5600 H17C .C11 2.6600

H8C .C52_v 2.9800 H17C .C16 2.7900

H8C .O5_v 2.9000 H18 .O73_k 2.6400

H8C .H52A_v 2.4200 H18 .H8B_q 2.5600

H14 .H18 2.3300 H18 .H14 2.3300

H14 .C18 2.6000 H18 .C14 2.5300

H14 .H15 2.2800 H24 .O73_c 2.8200

H15 .O93_h 2.4300 H24 .O71_c 2.6800

H15 .H16 2.3300 H24 .C28 2.5900

H15 .N9_h 2.8500 H24 .H25 2.3000

H15 .H14 2.2800 H24 .H28 2.3600

H16 .H17A 2.2600 H25 .C18_g 2.8700

H16 .O11 2.6500 H25 .H26 2.3300

H16 .C26_d 2.7100 H25 .C14_g 2.9900

H16 .C17 2.5000 H25 .H24 2.3000

H16 .C25_d 2.8700 H25 .C13_g 2.7100

H16 .H17C 2.3200 H26 .C27 2.5200

H16 .H15 2.3300 H26 .H25 2.3300

H17A .H16 2.2600 H26 .H27A 2.1400

H17A .C16 2.7000 H26 .H27B 2.4600

H17A .C11 2.5900 H26 .O92_g 2.6600

H17A .C46_d 3.0700 H26 .O21 2.6800

H17B .O91 2.7500 H27A .C26 2.6200

H17B .H7A_e 2.2400 H27A .O92_g 2.8100

H17B .C7_e 2.8200 H27A .C21 2.5400

Table S8 - Contact Distances (Angstrom) (continued)

for: fa440 P2(1)/c R = 0.05

H27A .H26 2.1400 H37A .C36 2.7900

H27B .C26 2.8500 H37A .H36 2.3200

H27B .H26 2.4600 H37A .C31 2.6700

H27B .Ce1 4.0200 H37A .C34_n 2.8300

H27B .C21 2.6600 H37B .H36 2.3500

H27B .O93_g 2.8600 H37B .C44_b 2.9400

H27C .O73_k 2.8800 H37B .C31 2.6400

H27C .Ce1 3.5300 H37B .C45_b 2.8800

H27C .O13 2.5000 H37B .C36 2.7700

H28 .O91_c 2.6600 H37C .O42 2.6500

H28 .O71_c 2.7700 H37C .Ce1 3.5200

H28 .O23_c 2.9000 H37C .C42 2.7500

H28 .C24 2.5700 H37C .O83_n 2.8400

H28 .H24 2.3600 H37C .C41 3.0700

H34 .H38 2.3300 H38 .H8_s 2.4000

H34 .H35 2.2900 H38 .C8_s 2.9400

H34 .C38 2.5900 H38 .C34 2.5400

H34 .C52_m 2.8500 H38 .H34 2.3300

H34 .H52B_m 2.1200 H38 .O8_s 2.5500

H35 .H34 2.2900 H44 .O81_l 2.8700

H35 .H36 2.3500 H44 .H48 2.4400

H35 .O8_r 2.5400 H44 .C48 2.6400

H36 .H35 2.3500 H44 .H45 2.2900

H36 .C37 2.5400 H45 .C38_l 3.0600

H36 .O31 2.6600 H45 .O33_l 2.8600

H36 .H37A 2.3200 H45 .H44 2.2900

H36 .H37B 2.3500 H45 .H46 2.3500

H37A .C35_n 2.9300 H45 .O81_l 2.6900

Table S8 - Contact Distances (Angstrom) (continued)

for: fa440 P2(1)/c R = 0.05

H46 .O41 2.6800 H52A .C48 3.0400

H46 .C47 2.5800 H52A .C54 2.7600

H46 .O33_l 2.8400 H52A .H8C_a 2.4200

H46 .H47A 2.2800 H52B .C34_p 2.9900

H46 .H47C 2.4600 H52B .C53 2.7100

H46 .H45 2.3500 H52B .C54 2.7300

H47A .H46 2.2800 H52B .C53 2.7100

H47A .H7_o 2.3700 H52B .C54 2.7300

H47A .C41 2.6500 H52B .H53A 2.5500

H47A .C46 2.7700 H52B .H63B 2.5600

H47B .Ce2 3.8200 H52B .H64A 2.5700

H47B .Ce1 3.6100 H52B .H34_p 2.1200

H47B .O22 2.6800 H52C .C53 2.6400

H47C .H46 2.4600 H52C .C53 2.6400

H47C .C41 2.6300 H52C .N4 2.6500

H47C .C46 2.8300 H52C .O6 2.5200

H48 .C51 2.6700 H52C .C48 2.7400

H48 .C44 2.6200 H52C .H48 2.2000

H48 .H44 2.4400 H52C .H53B 2.4500

H48 .H52C 2.2000 H52C .O5_n 2.7800

H48 .O6 2.7300 H53A .C52 2.6900

H48 .C51 2.6700 H53A .H54A 2.5200

H48 .C52 2.6900 H53A .H52B 2.5500

H48 .H8A_j 2.5600 H53A .O72_k 2.8300

H52A .C54 2.7600 H53A .C54 2.7100

H52A .O83_n 2.8600 H53B .O8_j 2.8800

H52A .O5 2.5800 H53B .N4 2.6200

H52A .N4 2.6200 H53B .H52C 2.4500

Table S8 - Contact Distances (Angstrom) (continued)

for: fa440 P2(1)/c R = 0.05

H53B .C48 2.9600 H63B .C51 2.0800

H53B .C52 2.6800 H63B .C52 2.7100

H53C .N4 2.6200 H63B .C54 2.7000

H53C .H54B 2.4800 H63B .H53B 1.6200

H53C .O72_k 2.8200 H63B .H53C 1.5900

H53C .C54 2.6500 H63B .H54A 2.5000

H54A .C52 2.7900 H63B .H6 2.1900

H54A .C53 2.6700 H63B .C51 2.0800

H54A .H53A 2.5200 H63B .C54 2.7000

H54A .C34_k 2.9100 H63B .H52B 2.5600

H54B .O73_k 2.8600 H63B .H64A 2.5400

H54B .N4 2.5800 H64A .C51 2.0700

H54B .H4 2.2900 H64A .C52 2.7400

H54B .H53C 2.4800 H64A .C34_k 2.9200

H54B .C53 2.6900 H64A .C51 2.0700

H54B .H5 2.2600 H64A .C53 2.7000

H63A .N4 2.6300 H64A .C53 2.7000

H63A .C51 2.0800 H64A .H53A 2.5500

H63A .C51 2.0800 H64A .H54B 1.6400

H63A .C54 2.6500 H64A .H63B 2.5400

H63A .C54 2.6500 H64A .H52B 2.5700

H63A .O72_k 2.8100 H64A .O5 1.9600

H63A .H6 2.2000 H64B .N4 2.6000

H63A .H64B 2.4200 H64B .O5 2.0600

H63A .H54B 2.4700 H64B .O73_k 2.8100

H63A .H53A 1.6100 H64B .H4 2.3400

H63A .H53B 1.6100 H64B .H5 2.3100

H63B .O72_k 2.8000 H64B .H53C 2.4300

Table S8 - Contact Distances (Angstrom) (continued)

for: fa440 P2(1)/c R = 0.05

H64B .H54A 1.5600 H64C .H5 1.0600

H64B .H63A 2.4200 H64C .H54A 1.6500

H64B .C51 2.0700 H64C .H54B 1.5700

H64B .C51 2.0700 H64C .C51 2.0700

H64B .C53 2.6500 H64C .C52 2.7500

H64B .C53 2.6500 H64C .C51 2.0700

H64C .N4 2.6000 H64C .H4 2.4800

Table S9 - Hydrogen Bonds (Angstrom, Deg)

for: fa440 P2(1)/c R = 0.05

N4 -- H4 .. O42 0.8800 1.8500 2.575(6) 139.00 .

O5 -- H5 .. O82 0.8400 2.3300 2.865(14) 122.00 .

O5 -- H5 .. N4 0.8400 2.4800 2.836(14) 106.00 .

O7 -- H7 .. O8 0.8400 2.2000 2.851(15) 134.00 .

O8 -- H8 .. O7 0.8400 2.3200 2.851(15) 122.00 .

C8 -- H8A .. O6 0.9800 2.5000 2.93(3) 107.00 3_666

C15 -- H15 .. O93 0.9500 2.4300 3.323(9) 156.00 3_667

C27 -- H27C .. O13 0.9800 2.5000 3.149(8) 124.00 .

C35 -- H35 .. O8 0.9500 2.5400 3.425(12) 155.00 2_546

C38 -- H38 .. O8 0.9500 2.5500 3.431(13) 154.00 3_567

C52 -- H52C .. O6 0.9800 2.5200 2.89(4) 102.00 .
